# Supplementary material
Source: publisher site journal article supplement (https://www.dovepress.com/get_supplementary_file.php?f=369219.docx)
Supplement: Supplementary file 1 [file get_supplementary_file.php]

Supplements

**Figure S1.** DEPDC1B expression in LUSC. (A) DEPDC1B expression levels in LUSC and normal tissues in TCGA. (B) DEPDC1B expression levels in LUSC and matched normal tissues in TCGA. (C) DEPDC1B expression of IHC on 60 patients with LUSC tissues and 60 adjacent normal lung tissues. Representative IHC images of DEPDC1B expression in normal tissues (D) and LUSC tissues (E).

DEPDC1B, DEP domain-containing 1 B; LUSC, lung [squamous cell carcinoma](https://www.cancer.gov/Common/PopUps/popDefinition.aspx?id=CDR0000046595&version=Patient&language=English); TCGA, The Cancer Genome Atlas; IHC, immunohistochemistry.

**Figure S2.** Association of DEPDC1B expression with clinicopathologic characteristics in LUSC. (A) T stage, (B) N stage, (C) pathologic stage and (D)age.

DEPDC1B, DEP domain-containing 1 B; LUSC, lung [squamous cell carcinoma](https://www.cancer.gov/Common/PopUps/popDefinition.aspx?id=CDR0000046595&version=Patient&language=English).

**Figure S3.** Kaplan-Meier survival curves comparing high and low DEPDC1B expression in patients with LUSC in TCGA. (A) Overall survival. (B) Progression-free interval. Kaplan-Meier survival curves comparing high and low DEPDC1B expression of 60 LUSC patients (C) Overall survival. (D) Progress Free Interval.

DEPDC1B, DEP domain-containing 1 B; LUSC, lung [squamous cell carcinoma](https://www.cancer.gov/Common/PopUps/popDefinition.aspx?id=CDR0000046595&version=Patient&language=English); TCGA, The Cancer Genome Atlas.

**Figure S4.** Kaplan-Meier survival curves comparing high and low DEPDC1B expression of LUAD patients in TCGA. (A-H) Subgroup analysis for T, N, M, and pathologic stage in LUAD.

DEPDC1B, DEP domain-containing 1 B; LUAD, lung adenocarcinoma; TCGA, The Cancer Genome Atlas;

**Figure S5.** Calibration plot of the nomogram for predicting the likelihood of overall survival.

**Table S1**. The raw data about LUAD and LUSC in TCGA database

**Table S2**. Clinicopathological Characteristics in 100 Patients with LUAD and 60 Patients with LUSC.

**Figure S1.** DEPDC1B expression in LUSC. (A) DEPDC1B expression levels in LUSC and normal tissues in TCGA. (B) DEPDC1B expression levels in LUSC and matched normal tissues in TCGA. (C) DEPDC1B expression of IHC on 60 patients with LUSC tissues and 60 adjacent normal lung tissues. Representative IHC images of DEPDC1B expression in normal tissues (D) and LUSC tissues (E).

**
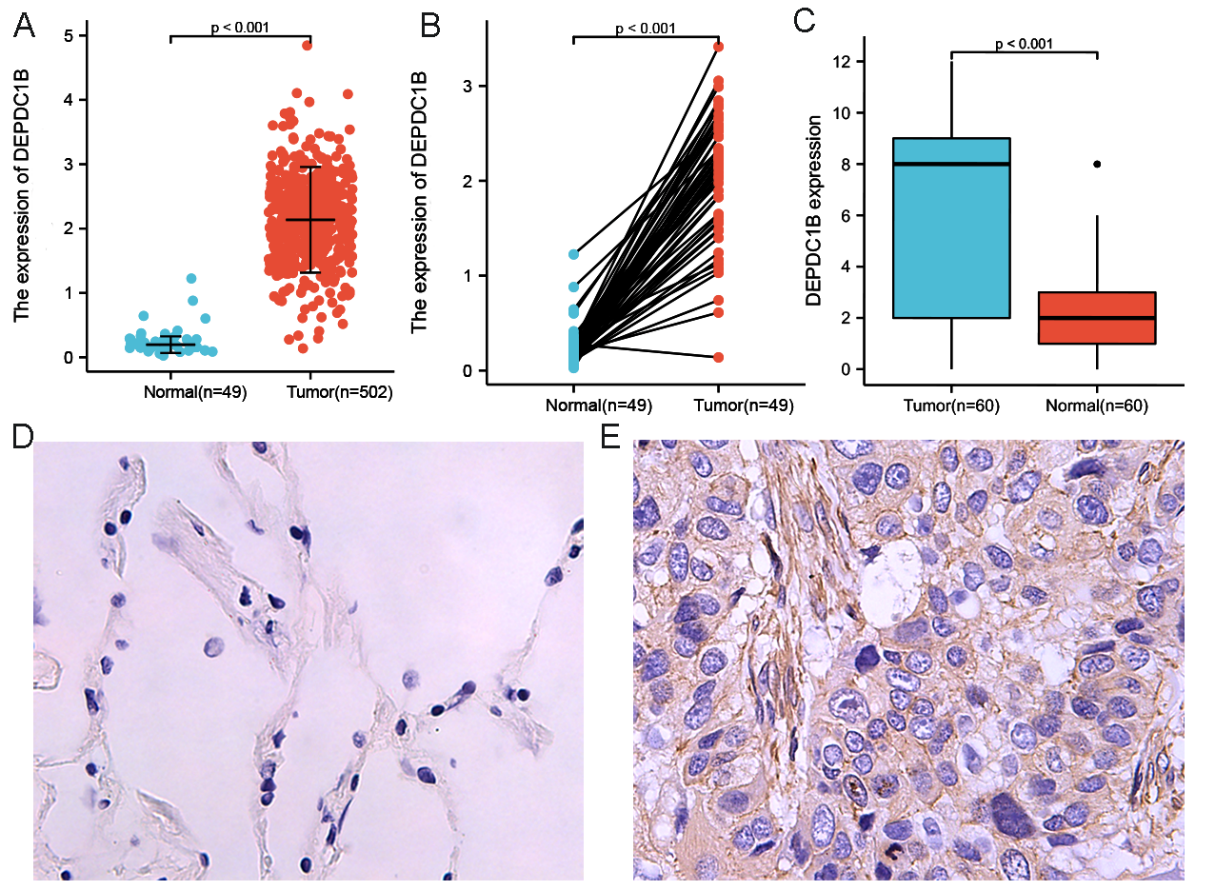
**

DEPDC1B, DEP domain-containing 1 B; LUSC, lung [squamous cell carcinoma](https://www.cancer.gov/Common/PopUps/popDefinition.aspx?id=CDR0000046595&version=Patient&language=English); TCGA, The Cancer Genome Atlas; IHC, immunohistochemistry.

**Figure S2.** Association of DEPDC1B expression with clinicopathologic characteristics in LUSC. (A) T stage, (B) N stage, (C) pathologic stage and (D)age.


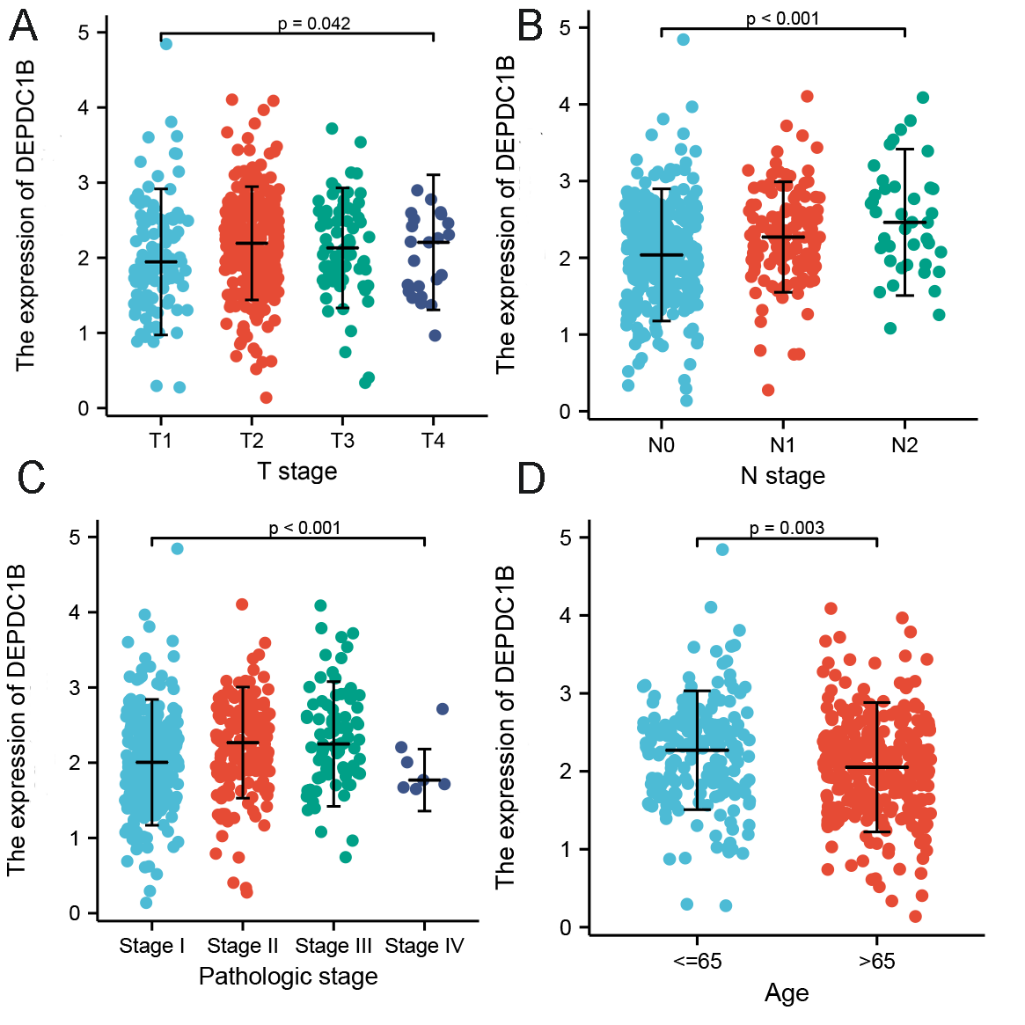


DEPDC1B, DEP domain-containing 1 B; LUSC, lung [squamous cell carcinoma](https://www.cancer.gov/Common/PopUps/popDefinition.aspx?id=CDR0000046595&version=Patient&language=English)

**Figure S3.** Kaplan-Meier survival curves comparing high and low DEPDC1B expression in patients with LUSC in TCGA. (A) Overall survival. (B) Progression-free interval. Kaplan-Meier survival curves comparing high and low DEPDC1B expression of 60 LUSC patients (C) Overall survival. (D) Progress Free Interval.

**
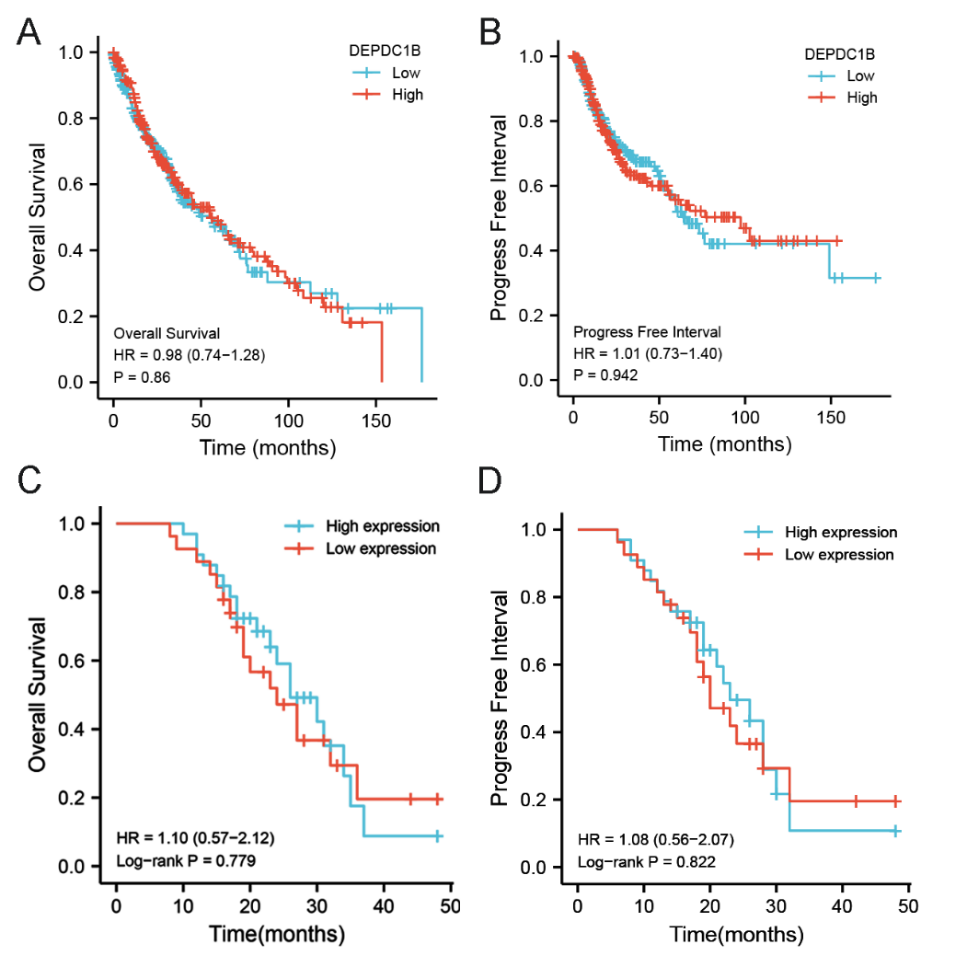
**

DEPDC1B, DEP domain-containing 1 B; LUSC, lung [squamous cell carcinoma](https://www.cancer.gov/Common/PopUps/popDefinition.aspx?id=CDR0000046595&version=Patient&language=English); TCGA, The Cancer Genome Atlas.

**Figure S4.** Kaplan-Meier survival curves comparing high and low DEPDC1B expression of LUAD patients in TCGA.

(A-H) Subgroup analysis for T, N, M, and pathologic stage in LUAD.

**
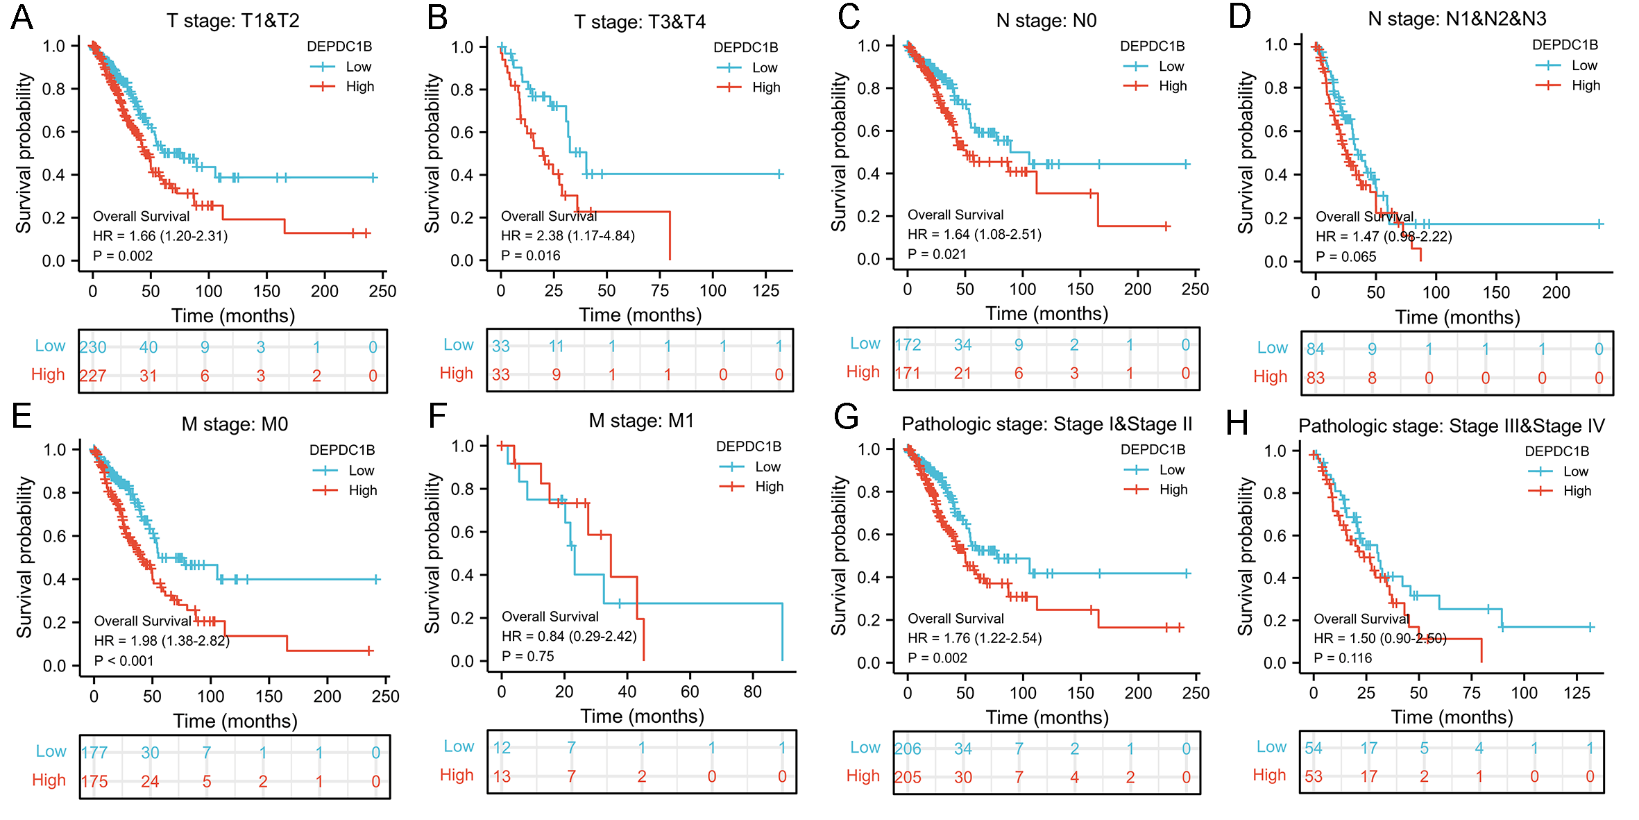
**

DEPDC1B, DEP domain-containing 1 B; LUAD, lung adenocarcinoma; TCGA, The Cancer Genome Atlas;

**Figure S5.** Calibration plot of the nomogram for predicting the likelihood of overall survival.

**
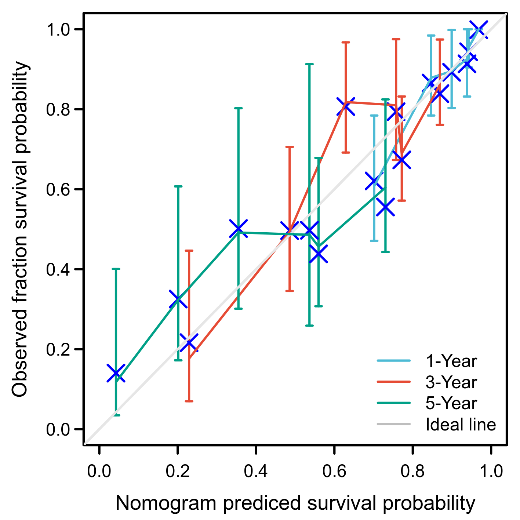
**

| **Table S1.** The raw data about LUAD and LUSC in TCGA database | | | | | | | | | | | | | |  |
| --- | --- | --- | --- | --- | --- | --- | --- | --- | --- | --- | --- | --- | --- | --- |
| RNAseq sample number | Status | Type | Residual tumor | Pathologic stage | M stage | N stage | T stage | Smoker | Vital status | Gender | Race | Age at initial pathologic  diagnosis | OS |  |
| TCGA-05- 4244-01A-01R-  1107-07 | Tumor | LUAD | RX | Stage IV | M1 | N2 | T2 | Yes | Alive | MALE | Not Available | 70 | 0 |  |
| TCGA-05- 4249-01A-01R-  1107-07 | Tumor | LUAD | R0 | Stage IB | M0 | N0 | T2 | Yes | Alive | MALE | Not Available | 67 | 1523 |  |
| TCGA-05- 4250-01A-01R-  1107-07 | Tumor | LUAD | R2 | Stage IIIA | M0 | N1 | T3 | Yes | Dead | FEMALE | Not Available | 79 | 121 |  |
| TCGA-05- 4382-01A-01R-  1206-07 | Tumor | LUAD | R0 | Stage IB | M0 | N0 | T2 | Yes | Alive | MALE | Not Available | 68 | 607 |  |
| TCGA-05- 4384-01A-01R-  1755-07 | Tumor | LUAD | RX | Stage IIIA | M0 | N2 | T2 | Yes | Alive | MALE | Not Available | 66 | 426 |  |
| TCGA-05- 4389-01A-01R-  1206-07 | Tumor | LUAD | R0 | Stage IA | M0 | N0 | T1 | Yes | Alive | MALE | Not Available | 70 | 1369 |  |
| TCGA-05- 4390-01A-02R-  1755-07 | Tumor | LUAD | R0 | Stage IB | M0 | N0 | T2 | Yes | Alive | FEMALE | Not Available | 58 | 1126 |  |
| TCGA-05- 4395-01A-01R-  1206-07 | Tumor | LUAD | R0 | Stage IIIB | M0 | N2 | T4 | Yes | Dead | MALE | Not Available | 76 | 0 |  |
| TCGA-05- 4396-01A-21R-  1858-07 | Tumor | LUAD | R0 | Stage IIIB | M0 | N1 | T4 | Yes | Dead | MALE | Not Available | 76 | 303 |  |
| TCGA-05- 4397-01A-01R-  1206-07 | Tumor | LUAD | R0 | Stage IIB | M0 | N1 | T2 | Yes | Dead | MALE | Not Available | 65 | 731 |  |
| TCGA-05- 4398-01A-01R-  1206-07 | Tumor | LUAD | R0 | Stage IIIB | M0 | N3 | T4 | Yes | Alive | FEMALE | Not Available | 47 | 1431 |  |
| TCGA-05- 4402-01A-01R-  1206-07 | Tumor | LUAD | R2 | Stage IV | M1 | NX | T2 | No | Dead | FEMALE | Not Available | 57 | 244 |  |
| TCGA-05- 4403-01A-01R-  1206-07 | Tumor | LUAD | R0 | Stage IB | M0 | N0 | T2 | Yes | Alive | MALE | Not Available | 76 | 578 |  |
| TCGA-05- 4405-01A-21R-  1858-07 | Tumor | LUAD | R0 | Stage IB | M0 | N0 | T2 | Yes | Alive | FEMALE | Not Available | 74 | 610 |  |
| TCGA-05- 4410-01A-21R-  1858-07 | Tumor | LUAD | RX | Stage IB | M0 | N0 | T2 | Yes | Alive | MALE | Not Available | 62 | 0 |  |
| TCGA-05- 4415-01A-22R-  1858-07 | Tumor | LUAD | R0 | Stage IIIB | M0 | N2 | T4 | Yes | Dead | MALE | Not Available | 57 | 91 |  |
| TCGA-05- 4417-01A-22R-  1858-07 | Tumor | LUAD | R0 | Stage IB | M0 | N0 | T2 | Yes | Alive | FEMALE | Not Available | 51 | 455 |  |
| TCGA-05- 4418-01A-01R-  1206-07 | Tumor | LUAD | R0 | Stage IIIA | M0 | N2 | T3 | Yes | Dead | MALE | Not Available | 69 | 274 |  |
| TCGA-05- 4420-01A-01R-  1206-07 | Tumor | LUAD | R0 | Stage IB | M0 | N0 | T2 | Yes | Alive | MALE | Not Available | 41 | 912 |  |
| TCGA-05- 4422-01A-01R-  1206-07 | Tumor | LUAD | R0 | Stage IB | M0 | N0 | T2 | Yes | Alive | MALE | Not Available | 68 | 365 |  |
| TCGA-05- 4424-01A-22R-  1858-07 | Tumor | LUAD | R1 | Stage IIB | M0 | N0 | T3 | Yes | Alive | MALE | Not Available | 70 | 913 |  |
| TCGA-05- 4425-01A-01R-  1755-07 | Tumor | LUAD | R1 | Stage IV | M1 | N0 | T2 | Yes | Alive | FEMALE | Not Available | 70 | 669 |  |
| TCGA-05- 4426-01A-01R-  1206-07 | Tumor | LUAD | R0 | Stage IB | M0 | N0 | T2 | Yes | Alive | MALE | Not Available | 71 | 791 |  |
| TCGA-05- 4427-01A-21R-  1858-07 | Tumor | LUAD | R0 | Stage IIB | M0 | N1 | T2 | Yes | Alive | FEMALE | Not Available | 65 | 791 |  |
| TCGA-05- 4430-01A-02R-  1206-07 | Tumor | LUAD | R0 | Stage IB | M0 | N0 | T2 | Yes | Alive | FEMALE | Not Available | 59 | 761 |  |
| TCGA-05- 4432-01A-01R-  1206-07 | Tumor | LUAD | R0 | Stage IIB | M0 | N1 | T2 | Yes | Alive | MALE | Not Available | 66 | 761 |  |
| TCGA-05- 4433-01A-22R-  1858-07 | Tumor | LUAD | R0 | Stage IB | M0 | N0 | T2 | Yes | Alive | MALE | Not Available | 82 | 730 |  |
| TCGA-05- 4434-01A-01R-  1206-07 | Tumor | LUAD | R2 | Stage IV | M1 | N1 | T4 | Yes | Dead | FEMALE | Not Available | 67 | 457 |  |
| TCGA-05- 5420-01A-01R-  1628-07 | Tumor | LUAD | R0 | Stage IIIA | M0 | N2 | T2 | Yes | Alive | MALE | Not Available | 67 | 457 |  |
| TCGA-05- 5423-01A-01R-  1628-07 | Tumor | LUAD | R0 | Stage IIB | M0 | N1 | T2 | Yes | Alive | MALE | Not Available | 65 | 151 |  |
| TCGA-05- 5425-01A-02R-  1628-07 | Tumor | LUAD | R0 | Stage IIB | M0 | N1 | T2b | Yes | Alive | MALE | Not Available | 68 | 882 |  |
| TCGA-05- 5428-01A-01R-  1628-07 | Tumor | LUAD | R0 | Stage IIA | M0 | N1 | T1b | Yes | Alive | MALE | Not Available | 57 | 670 |  |
| TCGA-05- 5429-01A-01R-  1628-07 | Tumor | LUAD | R0 | Stage IIIA | M0 | N2 | T3 | No | Alive | MALE | Not Available | 60 | 275 |  |
| TCGA-05- 5715-01A-01R-  1628-07 | Tumor | LUAD | R0 | Stage IB | M0 | N0 | T2a | No | Alive | FEMALE | Not Available | 69 | 62 |  |
| TCGA-35- 3615-01A-01R-  0946-07 | Tumor | LUAD | R0 | Stage IB | M0 | N0 | T2 | No | Alive | MALE | WHITE | 57 | 14 |  |
| TCGA-35- 4122-01A-01R-  1107-07 | Tumor | LUAD | R0 | Stage IA | M0 | N0 | T1 | Yes | Alive | MALE | WHITE | 69 | 225 |  |
| TCGA-35- 4123-01A-01R-  1107-07 | Tumor | LUAD | R0 | Stage IA | M0 | N0 | T1 | Yes | Alive | MALE | WHITE | 38 | 182 |  |
| TCGA-35- 5375-01A-01R-  1628-07 | Tumor | LUAD | R0 | Stage IIIA | M0 | N2 | T2 | Yes | Alive | MALE | WHITE | 61 | 264 |  |
| TCGA-38- 4625-01A-01R-  1206-07 | Tumor | LUAD | R0 | Stage IB | M0 | N0 | T2a | Yes | Alive | FEMALE | WHITE | 66 | 2973 |  |
| TCGA-38- 4625-11A-01R-  1758-07 | Normal | LUAD | R0 | Stage IB | M0 | N0 | T2a | Yes | Alive | FEMALE | WHITE | 66 | 2973 |  |
| TCGA-38- 4626-01A-01R-  1206-07 | Tumor | LUAD | R0 | Discrepancy | M0 | N0 | T2b | Yes | Alive | FEMALE | WHITE | 57 | 3674 |  |
| TCGA-38- 4626-11A-01R-  1758-07 | Normal | LUAD | R0 | Discrepancy | M0 | N0 | T2b | Yes | Alive | FEMALE | WHITE | 57 | 3674 |  |
| TCGA-38- 4627-01A-01R-  1206-07 | Tumor | LUAD | R0 | Stage IIA | M0 | N1 | T1b | Yes | Dead | FEMALE | WHITE | 64 | 1147 |  |
| TCGA-38- 4627-11A-01R-  1758-07 | Normal | LUAD | R0 | Stage IIA | M0 | N1 | T1b | Yes | Dead | FEMALE | WHITE | 64 | 1147 |  |
| TCGA-38- 4628-01A-01R-  1206-07 | Tumor | LUAD | R0 | Stage IIB | M0 | N1 | T2 | No | Dead | FEMALE | WHITE | 65 | 1492 |  |
| TCGA-38- 4629-01A-02R-  1206-07 | Tumor | LUAD | R0 | Stage IIB | M0 | N0 | T3 | Yes | Dead | MALE | WHITE | 68 | 864 |  |
| TCGA-38- 4630-01A-01R-  1206-07 | Tumor | LUAD | R1 | Stage IB | M0 | N0 | T2 | No | Dead | FEMALE | WHITE | 75 | 1073 |  |
| TCGA-38- 4631-01A-01R-  1755-07 | Tumor | LUAD | R0 | Stage IB | M0 | N0 | T2 | Yes | Dead | FEMALE | WHITE | 72 | 354 |  |
| TCGA-38- 4632-01A-01R-  1755-07 | Tumor | LUAD | R0 | Stage IV | M1 | N1 | T2 | Yes | Dead | MALE | BLACK OR AFRICAN AMERICAN | 42 | 1357 |  |
| TCGA-38- 4632-11A-01R-  1755-07 | Normal | LUAD | R0 | Stage IV | M1 | N1 | T2 | Yes | Dead | MALE | BLACK OR AFRICAN AMERICAN | 42 | 1357 |  |
| TCGA-38- 6178-01A-11R-  1755-07 | Tumor | LUAD | R1 | Stage IIIA | Not Available | N2 | T2b | No | Alive | FEMALE | WHITE | 70 | 448 |  |
| TCGA-38- 7271-01A-11R-  2039-07 | Tumor | LUAD | R0 | Stage IA | M0 | N0 | T1 | Yes | Dead | FEMALE | WHITE | 72 | 800 |  |
| TCGA-38-  A44F-01A-11R- A24H-07 | Tumor | LUAD | R0 | Stage IB | M0 | N0 | T2a | Yes | Alive | MALE | WHITE | 80 | 133 |  |
| TCGA-44- 2655-01A-01R-  0946-07 | Tumor | LUAD | R0 | Stage IA | M0 | N0 | T1 | Yes | Alive | FEMALE | WHITE | 65 | 1324 |  |
| TCGA-44- 2655-11A-01R-  1758-07 | Normal | LUAD | R0 | Stage IA | M0 | N0 | T1 | Yes | Alive | FEMALE | WHITE | 65 | 1324 |  |
| TCGA-44- 2656-01A-02R-  0946-07 | Tumor | LUAD | Not Available | Stage IB | M0 | N0 | T2 | Yes | Alive | MALE | WHITE | 59 | 1429 |  |
| TCGA-44- 2656-01A-02R- A278-07 | Tumor | LUAD | Not Available | Stage IB | M0 | N0 | T2 | Yes | Alive | MALE | WHITE | 59 | 1429 |  |
| TCGA-44- 2656-01B-06R- A277-07 | Tumor | LUAD | Not Available | Stage IB | M0 | N0 | T2 | Yes | Alive | MALE | WHITE | 59 | 1429 |  |
| TCGA-44- 2657-01A-01R-  1107-07 | Tumor | LUAD | R0 | Stage IB | M0 | NX | T2 | Yes | Alive | FEMALE | WHITE | 74 | 1351 |  |
| TCGA-44- 2657-11A-01R-  1758-07 | Normal | LUAD | R0 | Stage IB | M0 | NX | T2 | Yes | Alive | FEMALE | WHITE | 74 | 1351 |  |
| TCGA-44- 2659-01A-01R-  0946-07 | Tumor | LUAD | R0 | Stage IIB | M0 | N1 | T1 | Yes | Alive | FEMALE | WHITE | 65 | 1367 |  |
| TCGA-44- 2661-01A-01R-  1107-07 | Tumor | LUAD | R0 | Stage IA | M0 | N0 | T1 | No | Alive | FEMALE | WHITE | 69 | 1159 |  |
| TCGA-44- 2661-11A-01R-  1758-07 | Normal | LUAD | R0 | Stage IA | M0 | N0 | T1 | No | Alive | FEMALE | WHITE | 69 | 1159 |  |
| TCGA-44- 2662-01A-01R-  0946-07 | Tumor | LUAD | R0 | Stage IB | M0 | N0 | T2 | Yes | Alive | MALE | WHITE | 65 | 1280 |  |
| TCGA-44- 2662-01A-01R- A278-07 | Tumor | LUAD | R0 | Stage IB | M0 | N0 | T2 | Yes | Alive | MALE | WHITE | 65 | 1280 |  |
| TCGA-44- 2662-01B-02R- A277-07 | Tumor | LUAD | R0 | Stage IB | M0 | N0 | T2 | Yes | Alive | MALE | WHITE | 65 | 1280 |  |
| TCGA-44- 2662-11A-01R-  1758-07 | Normal | LUAD | R0 | Stage IB | M0 | N0 | T2 | Yes | Alive | MALE | WHITE | 65 | 1280 |  |
| TCGA-44- 2665-01A-01R-  0946-07 | Tumor | LUAD | R0 | Stage IIB | M0 | N1 | T2 | No | Alive | FEMALE | WHITE | 55 | 1301 |  |
| TCGA-44- 2665-11A-01R-  1758-07 | Normal | LUAD | R0 | Stage IIB | M0 | N1 | T2 | No | Alive | FEMALE | WHITE | 55 | 1301 |  |
| TCGA-44- 2666-01A-01R-  0946-07 | Tumor | LUAD | R0 | Stage IB | M0 | N0 | T2 | Yes | Dead | MALE | WHITE | 43 | 97 |  |
| TCGA-44- 2666-01A-01R- A278-07 | Tumor | LUAD | R0 | Stage IB | M0 | N0 | T2 | Yes | Dead | MALE | WHITE | 43 | 97 |  |
| TCGA-44- 2666-01B-02R- A277-07 | Tumor | LUAD | R0 | Stage IB | M0 | N0 | T2 | Yes | Dead | MALE | WHITE | 43 | 97 |  |
| TCGA-44- 2668-01A-01R-  0946-07 | Tumor | LUAD | R0 | Stage IB | M0 | N0 | T2 | Yes | Alive | MALE | WHITE | 51 | 761 |  |
| TCGA-44-  2668-01A-01R- A278-07 | Tumor | LUAD | R0 | Stage IB | M0 | N0 | T2 | Yes | Alive | MALE | WHITE | 51 | 761 |  |
| TCGA-44- 2668-01B-02R- A277-07 | Tumor | LUAD | R0 | Stage IB | M0 | N0 | T2 | Yes | Alive | MALE | WHITE | 51 | 761 |  |
| TCGA-44- 2668-11A-01R-  1758-07 | Normal | LUAD | R0 | Stage IB | M0 | N0 | T2 | Yes | Alive | MALE | WHITE | 51 | 761 |  |
| TCGA-44- 3396-01A-01R-  1206-07 | Tumor | LUAD | R0 | Stage IIIA | M0 | N2 | T2 | Yes | Alive | FEMALE | WHITE | 74 | 1130 |  |
| TCGA-44- 3396-11A-01R-  1758-07 | Normal | LUAD | R0 | Stage IIIA | M0 | N2 | T2 | Yes | Alive | FEMALE | WHITE | 74 | 1130 |  |
| TCGA-44- 3398-01A-01R-  1107-07 | Tumor | LUAD | R0 | Stage IA | M0 | N0 | T1b | Yes | Alive | FEMALE | WHITE | 77 | 1163 |  |
| TCGA-44- 3398-11B-01R-  1758-07 | Normal | LUAD | R0 | Stage IA | M0 | N0 | T1b | Yes | Alive | FEMALE | WHITE | 77 | 1163 |  |
| TCGA-44-  3917-01A-01R- A278-07 | Tumor | LUAD | R0 | Stage IB | M0 | N0 | T2 | Yes | Alive | FEMALE | WHITE | 33 | 1183 |  |
| TCGA-44- 3917-01B-02R- A277-07 | Tumor | LUAD | R0 | Stage IB | M0 | N0 | T2 | Yes | Alive | FEMALE | WHITE | 33 | 1183 |  |
| TCGA-44- 3918-01A-01R-  1107-07 | Tumor | LUAD | R0 | Stage IA | M0 | N0 | T1 | Yes | Alive | FEMALE | WHITE | 60 | 1036 |  |
| TCGA-44- 3918-01A-01R- A278-07 | Tumor | LUAD | R0 | Stage IA | M0 | N0 | T1 | Yes | Alive | FEMALE | WHITE | 60 | 1036 |  |
| TCGA-44- 3918-01B-02R- A277-07 | Tumor | LUAD | R0 | Stage IA | M0 | N0 | T1 | Yes | Alive | FEMALE | WHITE | 60 | 1036 |  |
| TCGA-44- 3919-01A-02R-  1107-07 | Tumor | LUAD | R0 | Stage IA | M0 | N0 | T1 | No | Alive | FEMALE | WHITE | 71 | 1026 |  |
| TCGA-44- 4112-01A-01R-  1107-07 | Tumor | LUAD | R0 | Stage IB | M0 | N0 | T2a | Yes | Alive | FEMALE | WHITE | 60 | 808 |  |
| TCGA-44-  4112-01B-06R- A277-07 | Tumor | LUAD | R0 | Stage IB | M0 | N0 | T2a | Yes | Alive | FEMALE | WHITE | 60 | 808 |  |
| TCGA-44- 5643-01A-01R-  1628-07 | Tumor | LUAD | Not Available | Stage IIIA | M0 | N2 | T2b | Yes | Alive | MALE | BLACK OR AFRICAN AMERICAN | 53 | 1013 |  |
| TCGA-44- 5644-01A-21R-  2039-07 | Tumor | LUAD | Not Available | Stage IB | Not Available | N0 | T2a | Yes | Alive | FEMALE | WHITE | 51 | 863 |  |
| TCGA-44- 5645-01A-01R-  1628-07 | Tumor | LUAD | Not Available | Stage IA | Not Available | NX | T1 | Yes | Alive | FEMALE | BLACK OR AFRICAN AMERICAN | 61 | 852 |  |
| TCGA-44- 5645-01A-01R- A278-07 | Tumor | LUAD | Not Available | Stage IA | Not Available | NX | T1 | Yes | Alive | FEMALE | BLACK OR AFRICAN AMERICAN | 61 | 852 |  |
| TCGA-44- 5645-01B-04R- A277-07 | Tumor | LUAD | Not Available | Stage IA | Not Available | NX | T1 | Yes | Alive | FEMALE | BLACK OR AFRICAN AMERICAN | 61 | 852 |  |
| TCGA-44- 5645-11A-01R-  1628-07 | Normal | LUAD | Not Available | Stage IA | Not Available | NX | T1 | Yes | Alive | FEMALE | BLACK OR AFRICAN AMERICAN | 61 | 852 |  |
| TCGA-44- 6144-11A-01R-  1755-07 | Normal | LUAD | RX | Stage IA | M0 | N0 | T1a | Yes | Alive | MALE | WHITE | 58 | 723 |  |
| TCGA-44- 6145-01A-11R-  1755-07 | Tumor | LUAD | Not Available | Stage IA | M0 | N0 | T1 | Yes | Alive | FEMALE | WHITE | 62 | 595 |  |
| TCGA-44- 6145-11A-01R-  1858-07 | Normal | LUAD | Not Available | Stage IA | M0 | N0 | T1 | Yes | Alive | FEMALE | WHITE | 62 | 595 |  |
| TCGA-44- 6146-01A-11R-  1755-07 | Tumor | LUAD | Not Available | Stage IIB | M0 | N0 | T3 | Yes | Alive | MALE | WHITE | 64 | 728 |  |
| TCGA-44- 6146-01A-11R- A278-07 | Tumor | LUAD | Not Available | Stage IIB | M0 | N0 | T3 | Yes | Alive | MALE | WHITE | 64 | 728 |  |
| TCGA-44- 6146-01B-04R- A277-07 | Tumor | LUAD | Not Available | Stage IIB | M0 | N0 | T3 | Yes | Alive | MALE | WHITE | 64 | 728 |  |
| TCGA-44- 6146-11A-01R-  1858-07 | Normal | LUAD | Not Available | Stage IIB | M0 | N0 | T3 | Yes | Alive | MALE | WHITE | 64 | 728 |  |
| TCGA-44- 6147-01A-11R-  1755-07 | Tumor | LUAD | Not Available | Stage IA | M0 | NX | T1b | Yes | Alive | FEMALE | WHITE | 67 | 845 |  |
| TCGA-44- 6147-01A-11R- A278-07 | Tumor | LUAD | Not Available | Stage IA | M0 | NX | T1b | Yes | Alive | FEMALE | WHITE | 67 | 845 |  |
| TCGA-44-  6147-01B-06R- A277-07 | Tumor | LUAD | Not Available | Stage IA | M0 | NX | T1b | Yes | Alive | FEMALE | WHITE | 67 | 845 |  |
| TCGA-44- 6147-11A-01R-  1858-07 | Normal | LUAD | Not Available | Stage IA | M0 | NX | T1b | Yes | Alive | FEMALE | WHITE | 67 | 845 |  |
| TCGA-44- 6148-01A-11R-  1755-07 | Tumor | LUAD | RX | Stage IA | M0 | N0 | T1b | Yes | Alive | MALE | WHITE | 60 | 704 |  |
| TCGA-44- 6148-11A-01R-  1858-07 | Normal | LUAD | RX | Stage IA | M0 | N0 | T1b | Yes | Alive | MALE | WHITE | 60 | 704 |  |
| TCGA-44- 6774-01A-21R-  1858-07 | Tumor | LUAD | Not Available | Stage IIIA | M0 | N2 | T1 | Yes | Alive | FEMALE | WHITE | 56 | 658 |  |
| TCGA-44- 6775-01A-11R-  1858-07 | Tumor | LUAD | RX | Stage IB | MX | N0 | T2a | Yes | Alive | FEMALE | WHITE | 72 | 705 |  |
| TCGA-44- 6775-01A-11R- A278-07 | Tumor | LUAD | RX | Stage IB | MX | N0 | T2a | Yes | Alive | FEMALE | WHITE | 72 | 705 |  |
| TCGA-44-  6775-01C-02R- A277-07 | Tumor | LUAD | RX | Stage IB | MX | N0 | T2a | Yes | Alive | FEMALE | WHITE | 72 | 705 |  |
| TCGA-44- 6776-01A-11R-  1858-07 | Tumor | LUAD | Not Available | Stage IA | MX | N0 | T1 | Yes | Alive | FEMALE | WHITE | 60 | 2616 |  |
| TCGA-44- 6776-11A-01R-  1858-07 | Normal | LUAD | Not Available | Stage IA | MX | N0 | T1 | Yes | Alive | FEMALE | WHITE | 60 | 2616 |  |
| TCGA-44- 6777-01A-11R-  1858-07 | Tumor | LUAD | Not Available | Stage IB | MX | NX | T2 | Yes | Dead | FEMALE | WHITE | 85 | 987 |  |
| TCGA-44- 6777-11A-01R-  1858-07 | Normal | LUAD | Not Available | Stage IB | MX | NX | T2 | Yes | Dead | FEMALE | WHITE | 85 | 987 |  |
| TCGA-44- 6778-01A-11R-  1858-07 | Tumor | LUAD | Not Available | Stage IA | MX | N0 | T1 | Yes | Alive | MALE | BLACK OR AFRICAN AMERICAN | 59 | 1864 |  |
| TCGA-44- 6778-11A-01R-  1858-07 | Normal | LUAD | Not Available | Stage IA | MX | N0 | T1 | Yes | Alive | MALE | BLACK OR AFRICAN AMERICAN | 59 | 1864 |  |
| TCGA-44- 6779-01A-11R-  1858-07 | Tumor | LUAD | Not Available | Stage IIB | MX | N1 | T2 | Yes | Dead | FEMALE | WHITE | 50 | 500 |  |
| TCGA-44- 7659-01A-11R-  2066-07 | Tumor | LUAD | Not Available | Stage IA | MX | N0 | T1b | Yes | Alive | MALE | WHITE | 70 | 691 |  |
| TCGA-44- 7660-01A-11R-  2066-07 | Tumor | LUAD | Not Available | Stage IB | MX | N0 | T2 | Yes | Alive | MALE | WHITE | 72 | 592 |  |
| TCGA-44- 7661-01A-11R-  2066-07 | Tumor | LUAD | Not Available | Stage IB | M0 | N0 | T2a | Yes | Alive | FEMALE | WHITE | 69 | 557 |  |
| TCGA-44- 7662-01A-11R-  2066-07 | Tumor | LUAD | Not Available | Stage IB | MX | N0 | T2a | Yes | Alive | MALE | WHITE | 61 | 218 |  |
| TCGA-44- 7667-01A-31R-  2066-07 | Tumor | LUAD | Not Available | Stage IIB | MX | N0 | T3 | Yes | Alive | FEMALE | WHITE | 49 | 1097 |  |
| TCGA-44- 7669-01A-21R-  2066-07 | Tumor | LUAD | Not Available | Stage IIA | MX | N1 | T1b | Yes | Dead | MALE | BLACK OR AFRICAN AMERICAN | 59 | 574 |  |
| TCGA-44- 7670-01A-11R-  2066-07 | Tumor | LUAD | Not Available | Stage IIA | M0 | N1 | T1b | Yes | Alive | FEMALE | WHITE | 47 | 882 |  |
| TCGA-44- 7671-01A-11R-  2066-07 | Tumor | LUAD | Not Available | Stage IB | M0 | N0 | T2a | Yes | Alive | MALE | BLACK OR AFRICAN AMERICAN | 64 | 889 |  |
| TCGA-44- 7672-01A-11R-  2066-07 | Tumor | LUAD | Not Available | Stage IA | M0 | N0 | T1b | Yes | Alive | FEMALE | WHITE | 52 | 719 |  |
| TCGA-44- 8117-01A-11R-  2241-07 | Tumor | LUAD | Not Available | Stage IB | M0 | N0 | T2a | Yes | Alive | FEMALE | WHITE | 54 | 385 |  |
| TCGA-44- 8119-01A-11R-  2241-07 | Tumor | LUAD | Not Available | Stage IIB | M0 | N0 | T3 | Yes | Alive | MALE | WHITE | 73 | 285 |  |
| TCGA-44- 8120-01A-11R-  2241-07 | Tumor | LUAD | Not Available | Stage IB | M0 | N0 | T2a | Yes | Alive | MALE | BLACK OR AFRICAN AMERICAN | 58 | 260 |  |
| TCGA-44- A479-01A-31R- A24H-07 | Tumor | LUAD | R0 | Stage IB | MX | N0 | T2 | Yes | Alive | FEMALE | BLACK OR AFRICAN AMERICAN | 73 | 486 |  |
| TCGA-44-  A47A-01A- 21R-A24H-07 | Tumor | LUAD | R0 | Stage IB | MX | N0 | T2a | Yes | Alive | FEMALE | WHITE | 78 | 466 |  |
| TCGA-44- A47B-01A-11R- A24H-07 | Tumor | LUAD | R0 | Stage IB | M0 | N0 | T2a | Yes | Alive | MALE | WHITE | 79 | 287 |  |
| TCGA-44- A47G-01A- 21R-A24H-07 | Tumor | LUAD | R0 | Stage IA | M0 | N0 | T1 | Yes | Alive | FEMALE | WHITE | 73 | 351 |  |
| TCGA-44- A4SS-01A- 11R-A24X-07 | Tumor | LUAD | Not Available | Stage IA | M0 | N0 | T1b | Yes | Alive | MALE | WHITE | 73 | 415 |  |
| TCGA-44- A4SU-01A- 11R-A24X-07 | Tumor | LUAD | R0 | Stage IA | MX | N0 | T1a | Yes | Alive | FEMALE | WHITE | 67 | 409 |  |
| TCGA-49- 4486-01A-01R-  1206-07 | Tumor | LUAD | R0 | Stage IA | M0 | N0 | T1 | Yes | Dead | MALE | WHITE | 72 | 2318 |  |
| TCGA-49- 4487-01A-21R-  1858-07 | Tumor | LUAD | R0 | Stage IA | M0 | N0 | T1 | Yes | Dead | FEMALE | WHITE | 72 | 855 |  |
| TCGA-49- 4488-01A-01R-  1755-07 | Tumor | LUAD | R0 | Stage IA | MX | N0 | T1 | Yes | Dead | FEMALE | WHITE | 74 | 869 |  |
| TCGA-49- 4490-01A-21R-  1858-07 | Tumor | LUAD | Not Available | Stage IIIA | M0 | N2 | T3 | Yes | Dead | FEMALE | WHITE | 45 | 385 |  |
| TCGA-49- 4490-11A-01R-  1858-07 | Normal | LUAD | Not Available | Stage IIIA | M0 | N2 | T3 | Yes | Dead | FEMALE | WHITE | 45 | 385 |  |
| TCGA-49- 4494-01A-01R-  1206-07 | Tumor | LUAD | R0 | Stage IIIA | M0 | N2 | T3 | Yes | Dead | MALE | WHITE | 77 | 1081 |  |
| TCGA-49- 4501-01A-01R-  1206-07 | Tumor | LUAD | R0 | Stage IB | M0 | N0 | T2 | No | Dead | FEMALE | WHITE | 67 | 1421 |  |
| TCGA-49- 4505-01A-01R-  1206-07 | Tumor | LUAD | R0 | Stage IIB | M0 | N1 | T2 | Yes | Dead | FEMALE | WHITE | 61 | 428 |  |
| TCGA-49- 4506-01A-01R-  1206-07 | Tumor | LUAD | R1 | Stage IIB | M0 | N1 | T2 | Yes | Dead | FEMALE | WHITE | 68 | 999 |  |
| TCGA-49- 4507-01A-01R-  1206-07 | Tumor | LUAD | R0 | Stage IIIA | M0 | N1 | T3 | Yes | Dead | FEMALE | WHITE | 73 | 268 |  |
| TCGA-49- 4510-01A-01R-  1206-07 | Tumor | LUAD | R0 | Stage IIB | M0 | N1 | T2 | Yes | Dead | FEMALE | BLACK OR AFRICAN AMERICAN | 51 | 896 |  |
| TCGA-49- 4512-01A-21R-  1858-07 | Tumor | LUAD | R1 | Stage IIIA | MX | N2 | T2 | No | Dead | FEMALE | WHITE | 69 | 905 |  |
| TCGA-49- 4512-11A-01R-  1858-07 | Normal | LUAD | R1 | Stage IIIA | MX | N2 | T2 | No | Dead | FEMALE | WHITE | 69 | 905 |  |
| TCGA-49- 4514-01A-21R-  1858-07 | Tumor | LUAD | R0 | Stage IA | M0 | N0 | T1 | Yes | Alive | FEMALE | WHITE | 79 | 1700 |  |
| TCGA-49- 6742-01A-11R-  1858-07 | Tumor | LUAD | R0 | Stage IIA | M0 | N1 | T2a | Yes | Alive | MALE | WHITE | 70 | 488 |  |
| TCGA-49- 6742-11A-01R-  1858-07 | Normal | LUAD | R0 | Stage IIA | M0 | N1 | T2a | Yes | Alive | MALE | WHITE | 70 | 488 |  |
| TCGA-49- 6743-01A-11R-  1858-07 | Tumor | LUAD | Not Available | Stage IIIA | MX | N2 | T1 | Yes | Alive | FEMALE | WHITE | 81 | 1621 |  |
| TCGA-49- 6743-11A-01R-  1858-07 | Normal | LUAD | Not Available | Stage IIIA | MX | N2 | T1 | Yes | Alive | FEMALE | WHITE | 81 | 1621 |  |
| TCGA-49- 6744-01A-11R-  1858-07 | Tumor | LUAD | R0 | Stage IIA | MX | N1 | T2a | Yes | Alive | FEMALE | WHITE | 64 | 1683 |  |
| TCGA-49- 6744-11A-01R-  1858-07 | Normal | LUAD | R0 | Stage IIA | MX | N1 | T2a | Yes | Alive | FEMALE | WHITE | 64 | 1683 |  |
| TCGA-49- 6745-01A-11R-  1858-07 | Tumor | LUAD | Not Available | Stage IIIA | M0 | N2 | T2a | Yes | Alive | MALE | WHITE | 82 | 522 |  |
| TCGA-49- 6745-11A-01R-  1858-07 | Normal | LUAD | Not Available | Stage IIIA | M0 | N2 | T2a | Yes | Alive | MALE | WHITE | 82 | 522 |  |
| TCGA-49- 6761-01A-31R-  1949-07 | Tumor | LUAD | R0 | Stage IIIA | MX | N2 | T1 | Yes | Alive | FEMALE | WHITE | 68 | 354 |  |
| TCGA-49- 6761-11A-01R-  1949-07 | Normal | LUAD | R0 | Stage IIIA | MX | N2 | T1 | Yes | Alive | FEMALE | WHITE | 68 | 354 |  |
| TCGA-49- 6767-01A-11R-  1858-07 | Tumor | LUAD | R0 | Stage IIB | MX | N0 | T3 | Yes | Alive | FEMALE | WHITE | 46 | 677 |  |
| TCGA-49- AAQV-01A- 11R-A39D-07 | Tumor | LUAD | R0 | Stage II | MX | N1 | T1 | No | Dead | FEMALE | BLACK OR AFRICAN AMERICAN | 63 | 677 |  |
| TCGA-49- AAR0-01A- 21R-A39D-07 | Tumor | LUAD | R0 | Stage IA | MX | N0 | T1 | Yes | Alive | MALE | BLACK OR AFRICAN AMERICAN | 57 | 4765 |  |
| TCGA-49- AAR2-01A- 11R-A39D-07 | Tumor | LUAD | R0 | Stage IB | MX | N0 | T2 | Yes | Alive | MALE | BLACK OR AFRICAN AMERICAN | 64 | 2224 |  |
| TCGA-49- AAR3-01A- 11R-A41B-07 | Tumor | LUAD | R0 | Stage IIB | MX | N1 | T2 | Unknown | Alive | MALE | BLACK OR AFRICAN AMERICAN | 69 | 1893 |  |
| TCGA-49- AAR4-01A- 12R-A41B-07 | Tumor | LUAD | R0 | Stage IIIA | MX | N2 | T2 | Yes | Dead | MALE | BLACK OR AFRICAN AMERICAN | 51 | 879 |  |
| TCGA-49- AAR9-01A- 21R-A41B-07 | Tumor | LUAD | R0 | Stage IIB | MX | N0 | T3 | Yes | Dead | MALE | BLACK OR AFRICAN AMERICAN | 61 | 260 |  |
| TCGA-49- AARE-01A- 11R-A41B-07 | Tumor | LUAD | R0 | Stage IA | MX | N0 | T1 | Yes | Dead | FEMALE | BLACK OR AFRICAN AMERICAN | 51 | 1229 |  |
| TCGA-49- AARN-01A- 21R-A41B-07 | Tumor | LUAD | R0 | Stage IA | MX | N0 | T1 | Yes | Dead | FEMALE | BLACK OR AFRICAN AMERICAN | 56 | 1135 |  |
| TCGA-49- AARO-01A- 12R-A41B-07 | Tumor | LUAD | R0 | Stage IA | MX | N0 | T1a | Yes | Alive | FEMALE | BLACK OR AFRICAN AMERICAN | 39 | 3759 |  |
| TCGA-49- AARQ-01A- 11R-A41B-07 | Tumor | LUAD | R0 | Stage I | MX | N0 | T2 | Yes | Alive | FEMALE | BLACK OR AFRICAN AMERICAN | 41 | 6732 |  |
| TCGA-49- AARR-01A- 11R-A41B-07 | Tumor | LUAD | R0 | Stage IA | MX | N0 | T1 | Yes | Alive | MALE | BLACK OR AFRICAN AMERICAN | 68 | 4992 |  |
| TCGA-4B- A93V-01A-11R- A39D-07 | Tumor | LUAD | R0 | Stage IA | M0 | N0 | T1b | Yes | Alive | FEMALE | BLACK OR AFRICAN AMERICAN | 52 | 300 |  |
| TCGA-50- 5044-01A-21R-  1858-07 | Tumor | LUAD | Not Available | Stage IIIB | M0 | N1 | T4 | Not Available | Dead | FEMALE | WHITE | 72 | 624 |  |
| TCGA-50- 5045-01A-01R-  1628-07 | Tumor | LUAD | Not Available | Discrepancy | M0 | N1 | T2 | Not Available | Dead | FEMALE | BLACK OR AFRICAN AMERICAN | 57 | 2174 |  |
| TCGA-50- 5049-01A-01R-  1628-07 | Tumor | LUAD | Not Available | Stage IA | M0 | N0 | T2 | Not Available | Alive | MALE | WHITE | 70 | 3094 |  |
| TCGA-50- 5051-01A-21R-  1858-07 | Tumor | LUAD | R0 | Stage IIIA | M0 | N2 | T2 | Yes | Alive | FEMALE | WHITE | 42 | 478 |  |
| TCGA-50- 5055-01A-01R-  1628-07 | Tumor | LUAD | R0 | Stage IIA | M0 | N1 | T1 | Not Available | Alive | FEMALE | WHITE | 79 | 1830 |  |
| TCGA-50- 5066-01A-01R-  1628-07 | Tumor | LUAD | R0 | Stage IB | M0 | N0 | T2 | No | Alive | MALE | BLACK OR AFRICAN AMERICAN | 72 | 1442 |  |
| TCGA-50- 5066-02A-11R-  2090-07 | Tumor | LUAD | R0 | Stage IB | M0 | N0 | T2 | No | Alive | MALE | BLACK OR AFRICAN AMERICAN | 72 | 1442 |  |
| TCGA-50- 5068-01A-01R-  1628-07 | Tumor | LUAD | Not Available | Stage IIB | MX | N1 | T2 | Not Available | Dead | FEMALE | WHITE | 59 | 1499 |  |
| TCGA-50- 5072-01A-21R-  1858-07 | Tumor | LUAD | Not Available | Stage IIIA | M0 | N2 | T2 | Yes | Alive | MALE | WHITE | 74 | 250 |  |
| TCGA-50- 5930-01A-11R-  1755-07 | Tumor | LUAD | Not Available | Stage IIIA | M0 | N2 | T2 | Not Available | Dead | MALE | WHITE | 47 | 282 |  |
| TCGA-50- 5930-11A-01R-  1755-07 | Normal | LUAD | Not Available | Stage IIIA | M0 | N2 | T2 | Not Available | Dead | MALE | WHITE | 47 | 282 |  |
| TCGA-50- 5931-01A-11R-  1755-07 | Tumor | LUAD | R0 | Stage IB | M0 | N0 | T2 | Yes | Dead | FEMALE | WHITE | 75 | 434 |  |
| TCGA-50- 5931-11A-01R-  1858-07 | Normal | LUAD | R0 | Stage IB | M0 | N0 | T2 | Yes | Dead | FEMALE | WHITE | 75 | 434 |  |
| TCGA-50- 5932-01A-11R-  1755-07 | Tumor | LUAD | Not Available | Stage IIB | M0 | N1 | T2 | Not Available | Dead | MALE | WHITE | 75 | 1235 |  |
| TCGA-50- 5932-11A-01R-  1755-07 | Normal | LUAD | Not Available | Stage IIB | M0 | N1 | T2 | Not Available | Dead | MALE | WHITE | 75 | 1235 |  |
| TCGA-50- 5933-01A-11R-  1755-07 | Tumor | LUAD | Not Available | Stage IIIB | M0 | N2 | T4 | Not Available | Dead | MALE | WHITE | 72 | 2393 |  |
| TCGA-50- 5933-11A-01R-  1755-07 | Normal | LUAD | Not Available | Stage IIIB | M0 | N2 | T4 | Not Available | Dead | MALE | WHITE | 72 | 2393 |  |
| TCGA-50- 5935-01A-11R-  1755-07 | Tumor | LUAD | Not Available | Stage IA | M0 | N0 | T1 | Not Available | Dead | FEMALE | WHITE | 86 | 653 |  |
| TCGA-50- 5935-11A-01R-  1858-07 | Normal | LUAD | Not Available | Stage IA | M0 | N0 | T1 | Not Available | Dead | FEMALE | WHITE | 86 | 653 |  |
| TCGA-50- 5936-01A-11R-  1628-07 | Tumor | LUAD | Not Available | Stage IIIA | M0 | N2 | T2 | Not Available | Dead | MALE | WHITE | 58 | 257 |  |
| TCGA-50- 5936-11A-01R-  1628-07 | Normal | LUAD | Not Available | Stage IIIA | M0 | N2 | T2 | Not Available | Dead | MALE | WHITE | 58 | 257 |  |
| TCGA-50- 5939-01A-11R-  1628-07 | Tumor | LUAD | Not Available | Stage IB | M0 | N0 | T2 | Yes | Dead | MALE | WHITE | 85 | 460 |  |
| TCGA-50- 5939-11A-01R-  1628-07 | Normal | LUAD | Not Available | Stage IB | M0 | N0 | T2 | Yes | Dead | MALE | WHITE | 85 | 460 |  |
| TCGA-50- 5941-01A-11R-  1755-07 | Tumor | LUAD | Not Available | Stage IIIA | M0 | N2 | T2a | Yes | Alive | FEMALE | WHITE | 55 | 1474 |  |
| TCGA-50- 5942-01A-21R-  1755-07 | Tumor | LUAD | R0 | Stage IA | M0 | N0 | T1 | Yes | Alive | FEMALE | WHITE | 67 | 1847 |  |
| TCGA-50- 5944-01A-11R-  1755-07 | Tumor | LUAD | R0 | Stage IA | M0 | N0 | T1 | Not Available | Alive | FEMALE | WHITE | 69 | 1750 |  |
| TCGA-50- 5946-01A-11R-  1755-07 | Tumor | LUAD | Not Available | Stage IA | MX | N0 | T1 | Yes | Alive | MALE | WHITE | 62 | 1617 |  |
| TCGA-50- 5946-02A-11R-  2090-07 | Tumor | LUAD | Not Available | Stage IA | MX | N0 | T1 | Yes | Alive | MALE | WHITE | 62 | 1617 |  |
| TCGA-50- 6590-01A-12R-  1858-07 | Tumor | LUAD | Not Available | Stage IB | M0 | N0 | T2 | Yes | Dead | FEMALE | WHITE | 72 | 1288 |  |
| TCGA-50- 6591-01A-11R-  1755-07 | Tumor | LUAD | Not Available | Stage IV | M1 | N0 | T2 | No | Dead | FEMALE | WHITE | 63 | 119 |  |
| TCGA-50- 6592-01A-11R-  1755-07 | Tumor | LUAD | Not Available | Stage IB | M0 | N0 | T2 | Yes | Dead | FEMALE | WHITE | 71 | 777 |  |
| TCGA-50- 6593-01A-11R-  1755-07 | Tumor | LUAD | R0 | Stage IIIA | M0 | N2 | T1 | Yes | Dead | FEMALE | WHITE | 49 | 336 |  |
| TCGA-50- 6594-01A-11R-  1755-07 | Tumor | LUAD | Not Available | Stage IIIA | M0 | N2 | T3 | Yes | Dead | FEMALE | BLACK OR AFRICAN AMERICAN | 79 | 370 |  |
| TCGA-50- 6595-01A-12R-  1858-07 | Tumor | LUAD | Not Available | Stage IIIA | M0 | N2 | T2 | Yes | Dead | FEMALE | WHITE | 74 | 189 |  |
| TCGA-50- 6595-11A-01R-  1858-07 | Normal | LUAD | Not Available | Stage IIIA | M0 | N2 | T2 | Yes | Dead | FEMALE | WHITE | 74 | 189 |  |
| TCGA-50- 6597-01A-11R-  1858-07 | Tumor | LUAD | R0 | Stage IB | M0 | N0 | T2 | No | Alive | FEMALE | WHITE | 79 | 1268 |  |
| TCGA-50- 6673-01A-11R-  1949-07 | Tumor | LUAD | R0 | Stage I | M0 | N0 | T1 | No | Dead | FEMALE | WHITE | 84 | 22 |  |
| TCGA-50- 7109-01A-11R-  2039-07 | Tumor | LUAD | Not Available | Stage IA | M0 | N0 | T1 | Yes | Alive | MALE | WHITE | 60 | 308 |  |
| TCGA-50- 8457-01A-11R-  2326-07 | Tumor | LUAD | Not Available | Stage IA | M0 | N0 | T1a | Yes | Alive | FEMALE | BLACK OR AFRICAN AMERICAN | 63 | 1125 |  |
| TCGA-50- 8459-01A-11R-  2326-07 | Tumor | LUAD | Not Available | Stage IIB | M0 | N0 | T3 | Yes | Alive | MALE | WHITE | 68 | 1119 |  |
| TCGA-50- 8460-01A-11R-  2326-07 | Tumor | LUAD | R0 | Stage IA | M0 | N0 | T1a | Unknown | Alive | MALE | WHITE | 74 | 829 |  |
| TCGA-53- 7624-01A-11R-  2066-07 | Tumor | LUAD | R0 | Stage IV | M1 | N0 | T2 | Yes | Dead | FEMALE | WHITE | 40 | 1043 |  |
| TCGA-53- 7626-01A-12R-  2066-07 | Tumor | LUAD | R0 | Stage IIA | M0 | N1 | T1 | Yes | Dead | FEMALE | WHITE | 76 | 929 |  |
| TCGA-53- 7813-01A-11R-  2170-07 | Tumor | LUAD | Not Available | Stage IIIB | M0 | N0 | T4 | Yes | Alive | FEMALE | WHITE | 51 | 424 |  |
| TCGA-53- A4EZ-01A- 12R-A24X-07 | Tumor | LUAD | RX | Stage IIA | MX | N1 | T2a | Yes | Alive | MALE | WHITE | 63 | 1071 |  |
| TCGA-55- 1592-01A-01R-  0946-07 | Tumor | LUAD | R0 | Stage IA | M0 | N0 | T2 | Yes | Dead | MALE | WHITE | 65 | 701 |  |
| TCGA-55- 1594-01A-01R-  0946-07 | Tumor | LUAD | R0 | Stage IIIA | M0 | N2 | T2 | Yes | Alive | MALE | WHITE | 68 | 1178 |  |
| TCGA-55- 1596-01A-01R-  0946-07 | Tumor | LUAD | R0 | Stage IIB | M0 | N1 | T2 | Yes | Alive | MALE | ASIAN | 55 | 2065 |  |
| TCGA-55- 5899-01A-11R-  1628-07 | Tumor | LUAD | R0 | Discrepancy | M0 | N1 | T1a | Yes | Alive | MALE | WHITE | 58 | 930 |  |
| TCGA-55- 6543-01A-11R-  1755-07 | Tumor | LUAD | Not Available | Stage IA | MX | N0 | T1b | Yes | Alive | FEMALE | WHITE | 60 | 435 |  |
| TCGA-55- 6642-01A-11R-  1858-07 | Tumor | LUAD | R0 | Stage IB | MX | N0 | T2 | Yes | Alive | MALE | WHITE | 63 | 2449 |  |
| TCGA-55- 6712-01A-11R-  1858-07 | Tumor | LUAD | R1 | Stage IIA | MX | N1 | T2a | Yes | Alive | MALE | WHITE | 71 | 171 |  |
| TCGA-55- 6968-01A-11R-  1949-07 | Tumor | LUAD | Not Available | Stage IV | M1 | N0 | T1 | Yes | Dead | MALE | WHITE | 61 | 1293 |  |
| TCGA-55- 6968-11A-01R-  1949-07 | Normal | LUAD | Not Available | Stage IV | M1 | N0 | T1 | Yes | Dead | MALE | WHITE | 61 | 1293 |  |
| TCGA-55- 6969-11A-01R-  1949-07 | Normal | LUAD | Not Available | Stage IB | M0 | N0 | T2 | Yes | Alive | MALE | WHITE | 52 | 1239 |  |
| TCGA-55- 6970-01A-11R-  1949-07 | Tumor | LUAD | R1 | Stage IIIA | MX | N2 | T2 | Yes | Dead | FEMALE | WHITE | 67 | 464 |  |
| TCGA-55- 6970-11A-01R-  1949-07 | Normal | LUAD | R1 | Stage IIIA | MX | N2 | T2 | Yes | Dead | FEMALE | WHITE | 67 | 464 |  |
| TCGA-55- 6971-01A-11R-  1949-07 | Tumor | LUAD | R0 | Stage IB | MX | N0 | T2 | Yes | Alive | FEMALE | WHITE | 59 | 1400 |  |
| TCGA-55- 6971-11A-01R-  1949-07 | Normal | LUAD | R0 | Stage IB | MX | N0 | T2 | Yes | Alive | FEMALE | WHITE | 59 | 1400 |  |
| TCGA-55- 6972-01A-11R-  1949-07 | Tumor | LUAD | R0 | Stage IB | M0 | N0 | T2 | Yes | Alive | MALE | WHITE | 72 | 1632 |  |
| TCGA-55- 6972-11A-01R-  1949-07 | Normal | LUAD | R0 | Stage IB | M0 | N0 | T2 | Yes | Alive | MALE | WHITE | 72 | 1632 |  |
| TCGA-55- 6975-01A-11R-  1949-07 | Tumor | LUAD | Not Available | Stage IIB | M0 | N1 | T2 | Yes | Dead | MALE | WHITE | 61 | 118 |  |
| TCGA-55- 6975-11A-01R-  1949-07 | Normal | LUAD | Not Available | Stage IIB | M0 | N1 | T2 | Yes | Dead | MALE | WHITE | 61 | 118 |  |
| TCGA-55- 6978-01A-11R-  1949-07 | Tumor | LUAD | Not Available | Stage IIA | MX | N0 | T2b | No | Dead | MALE | WHITE | 81 | 176 |  |
| TCGA-55- 6978-11A-01R-  1949-07 | Normal | LUAD | Not Available | Stage IIA | MX | N0 | T2b | No | Dead | MALE | WHITE | 81 | 176 |  |
| TCGA-55- 6979-01A-11R-  1949-07 | Tumor | LUAD | Not Available | Stage IIB | M0 | N1 | T2 | Yes | Dead | FEMALE | WHITE | 59 | 237 |  |
| TCGA-55- 6979-11A-01R-  1949-07 | Normal | LUAD | Not Available | Stage IIB | M0 | N1 | T2 | Yes | Dead | FEMALE | WHITE | 59 | 237 |  |
| TCGA-55- 6980-01A-11R-  1949-07 | Tumor | LUAD | R0 | Stage IA | M0 | N0 | T1 | No | Alive | MALE | WHITE | 56 | 2109 |  |
| TCGA-55- 6980-11A-01R-  1949-07 | Normal | LUAD | R0 | Stage IA | M0 | N0 | T1 | No | Alive | MALE | WHITE | 56 | 2109 |  |
| TCGA-55- 6981-01A-11R-  1949-07 | Tumor | LUAD | R0 | Stage IIIA | M0 | N2 | T1 | Yes | Dead | FEMALE | WHITE | 53 | 1379 |  |
| TCGA-55- 6981-11A-01R-  1949-07 | Normal | LUAD | R0 | Stage IIIA | M0 | N2 | T1 | Yes | Dead | FEMALE | WHITE | 53 | 1379 |  |
| TCGA-55- 6982-01A-11R-  1949-07 | Tumor | LUAD | Not Available | Stage IIB | M0 | N1 | T2 | No | Dead | FEMALE | WHITE | 79 | 995 |  |
| TCGA-55- 6982-11A-01R-  1949-07 | Normal | LUAD | Not Available | Stage IIB | M0 | N1 | T2 | No | Dead | FEMALE | WHITE | 79 | 995 |  |
| TCGA-55- 6983-01A-11R-  1949-07 | Tumor | LUAD | R0 | Stage IIB | M0 | N1 | T2 | Yes | Alive | MALE | WHITE | 81 | 2823 |  |
| TCGA-55- 6983-11A-01R-  1949-07 | Normal | LUAD | R0 | Stage IIB | M0 | N1 | T2 | Yes | Alive | MALE | WHITE | 81 | 2823 |  |
| TCGA-55- 6984-01A-11R-  1949-07 | Tumor | LUAD | Not Available | Stage IIB | M0 | N1 | T2 | Not Available | Dead | FEMALE | WHITE | 71 | 760 |  |
| TCGA-55- 6984-11A-01R-  1949-07 | Normal | LUAD | Not Available | Stage IIB | M0 | N1 | T2 | Not Available | Dead | FEMALE | WHITE | 71 | 760 |  |
| TCGA-55- 6985-01A-11R-  1949-07 | Tumor | LUAD | R0 | Stage IB | MX | N0 | T2 | Yes | Alive | FEMALE | WHITE | 58 | 1233 |  |
| TCGA-55- 6985-11A-01R-  1949-07 | Normal | LUAD | R0 | Stage IB | MX | N0 | T2 | Yes | Alive | FEMALE | WHITE | 58 | 1233 |  |
| TCGA-55- 6986-01A-11R-  1949-07 | Tumor | LUAD | Not Available | Stage IB | M0 | N0 | T2 | No | Alive | FEMALE | WHITE | 74 | 3261 |  |
| TCGA-55- 6986-11A-01R-  1949-07 | Normal | LUAD | Not Available | Stage IB | M0 | N0 | T2 | No | Alive | FEMALE | WHITE | 74 | 3261 |  |
| TCGA-55- 6987-01A-11R-  1949-07 | Tumor | LUAD | Not Available | Stage IA | M0 | N0 | T1 | Yes | Alive | MALE | WHITE | 77 | 2137 |  |
| TCGA-55- 7227-01A-11R-  2039-07 | Tumor | LUAD | R0 | Stage IIIA | MX | N1 | T3 | Yes | Alive | MALE | WHITE | 77 | 952 |  |
| TCGA-55- 7281-01A-11R-  2039-07 | Tumor | LUAD | R0 | Stage IA | M0 | N0 | T1b | Yes | Alive | FEMALE | WHITE | 70 | 872 |  |
| TCGA-55- 7283-01A-11R-  2039-07 | Tumor | LUAD | Not Available | Stage IIIA | MX | N2 | T3 | Yes | Alive | FEMALE | WHITE | 76 | 609 |  |
| TCGA-55- 7284-01B-11R-  2241-07 | Tumor | LUAD | R0 | Stage IIB | MX | N0 | T3 | Yes | Alive | MALE | WHITE | 74 | 243 |  |
| TCGA-55- 7570-01A-11R-  2039-07 | Tumor | LUAD | R0 | Stage IA | MX | N0 | T1a | Yes | Alive | MALE | BLACK OR AFRICAN AMERICAN | 60 | 824 |  |
| TCGA-55- 7573-01A-11R-  2039-07 | Tumor | LUAD | Not Available | Stage IA | MX | N0 | T1b | Yes | Alive | FEMALE | WHITE | 72 | 487 |  |
| TCGA-55- 7574-01A-11R-  2039-07 | Tumor | LUAD | R1 | Stage IB | M0 | N0 | T2a | Yes | Alive | FEMALE | WHITE | 64 | 995 |  |
| TCGA-55- 7576-01A-11R-  2066-07 | Tumor | LUAD | R0 | Stage IB | M0 | N0 | T2a | Yes | Alive | MALE | BLACK OR AFRICAN AMERICAN | 54 | 670 |  |
| TCGA-55- 7724-01A-11R-  2170-07 | Tumor | LUAD | R0 | Stage IB | MX | N0 | T2a | Yes | Alive | FEMALE | WHITE | 76 | 705 |  |
| TCGA-55- 7725-01A-11R-  2170-07 | Tumor | LUAD | R0 | Stage IA | MX | N0 | T1a | Yes | Alive | FEMALE | WHITE | 68 | 442 |  |
| TCGA-55- 7726-01A-11R-  2170-07 | Tumor | LUAD | R0 | Stage IA | MX | N0 | T1b | Yes | Alive | FEMALE | WHITE | 72 | 652 |  |
| TCGA-55- 7727-01A-11R-  2170-07 | Tumor | LUAD | R0 | Stage IIIA | MX | N2 | T1a | Yes | Alive | MALE | WHITE | 70 | 119 |  |
| TCGA-55- 7728-01A-11R-  2187-07 | Tumor | LUAD | R0 | Stage IB | MX | N0 | T2a | Yes | Alive | FEMALE | WHITE | 64 | 704 |  |
| TCGA-55- 7815-01A-11R-  2170-07 | Tumor | LUAD | R0 | Stage IB | MX | N0 | T2a | No | Alive | MALE | Not Available | 76 | 773 |  |
| TCGA-55- 7816-01A-11R-  2170-07 | Tumor | LUAD | Not Available | Stage IV | MX | NX | TX | No | Alive | FEMALE | WHITE | 49 | 468 |  |
| TCGA-55- 7903-01A-11R-  2170-07 | Tumor | LUAD | R0 | Stage IA | MX | N0 | T1b | Yes | Alive | MALE | WHITE | 64 | 567 |  |
| TCGA-55- 7907-01A-11R-  2170-07 | Tumor | LUAD | R0 | Stage IIA | MX | N1 | T2a | Yes | Alive | MALE | WHITE | 77 | 343 |  |
| TCGA-55- 7910-01A-11R-  2170-07 | Tumor | LUAD | R0 | Stage IIA | M0 | N0 | T2b | Yes | Alive | FEMALE | BLACK OR AFRICAN AMERICAN | 50 | 1040 |  |
| TCGA-55- 7911-01A-11R-  2170-07 | Tumor | LUAD | R0 | Stage IA | MX | N0 | T1a | Yes | Alive | FEMALE | WHITE | 70 | 537 |  |
| TCGA-55- 7913-01B-11R-  2241-07 | Tumor | LUAD | R0 | Stage IA | MX | N0 | T1b | Yes | Alive | FEMALE | BLACK OR AFRICAN AMERICAN | 61 | 561 |  |
| TCGA-55- 7914-01A-11R-  2170-07 | Tumor | LUAD | R0 | Stage IIA | MX | N1 | T1b | Yes | Alive | FEMALE | WHITE | 71 | 187 |  |
| TCGA-55- 7994-01A-11R-  2187-07 | Tumor | LUAD | R0 | Stage IIB | MX | N0 | T3 | Yes | Alive | MALE | WHITE | 81 | 603 |  |
| TCGA-55- 7995-01A-11R-  2187-07 | Tumor | LUAD | R0 | Stage IA | M0 | N0 | T1b | Yes | Alive | FEMALE | WHITE | 73 | 889 |  |
| TCGA-55- 8085-01A-11R-  2241-07 | Tumor | LUAD | R0 | Stage IA | M0 | N0 | T1b | Yes | Alive | MALE | WHITE | 64 | 904 |  |
| TCGA-55- 8087-01A-11R-  2241-07 | Tumor | LUAD | R0 | Stage IB | MX | N0 | T2a | No | Alive | FEMALE | WHITE | 59 | 462 |  |
| TCGA-55- 8089-01A-11R-  2241-07 | Tumor | LUAD | R0 | Stage IA | M0 | N0 | T1a | Yes | Alive | MALE | WHITE | 56 | 702 |  |
| TCGA-55- 8090-01A-11R-  2241-07 | Tumor | LUAD | R0 | Stage IA | M0 | N0 | T1a | Yes | Alive | MALE | WHITE | 80 | 598 |  |
| TCGA-55- 8091-01A-11R-  2241-07 | Tumor | LUAD | R0 | Stage IB | MX | N0 | T2 | Yes | Alive | MALE | WHITE | 74 | 600 |  |
| TCGA-55- 8092-01A-11R-  2241-07 | Tumor | LUAD | R0 | Stage IIB | MX | N0 | T3 | Yes | Alive | MALE | WHITE | 75 | 154 |  |
| TCGA-55- 8094-01A-11R-  2241-07 | Tumor | LUAD | R0 | Stage IV | M1b | N0 | T2b | Yes | Alive | MALE | WHITE | 51 | 541 |  |
| TCGA-55- 8096-01A-11R-  2241-07 | Tumor | LUAD | Not Available | Stage IB | MX | N0 | T2a | Yes | Alive | FEMALE | WHITE | 67 | 719 |  |
| TCGA-55- 8097-01A-11R-  2241-07 | Tumor | LUAD | R0 | Stage IA | MX | N0 | T1a | Yes | Alive | FEMALE | WHITE | 60 | 476 |  |
| TCGA-55- 8203-01A-11R-  2241-07 | Tumor | LUAD | R0 | Stage IA | M0 | N0 | T1b | Yes | Alive | FEMALE | WHITE | 69 | 547 |  |
| TCGA-55- 8204-01A-11R-  2241-07 | Tumor | LUAD | R0 | Stage IB | MX | N0 | T2a | Yes | Alive | FEMALE | WHITE | 87 | 515 |  |
| TCGA-55- 8205-01A-11R-  2241-07 | Tumor | LUAD | R0 | Stage IIA | M0 | N0 | T2b | Yes | Alive | FEMALE | WHITE | 76 | 599 |  |
| TCGA-55- 8206-01A-11R-  2241-07 | Tumor | LUAD | R0 | Stage IA | M0 | N0 | T1b | No | Alive | MALE | WHITE | 56 | 888 |  |
| TCGA-55- 8207-01A-11R-  2241-07 | Tumor | LUAD | R0 | Stage IB | MX | N0 | T2a | Yes | Alive | MALE | WHITE | 73 | 977 |  |
| TCGA-55- 8208-01A-11R-  2241-07 | Tumor | LUAD | R0 | Stage IA | M0 | N0 | T1b | Yes | Alive | FEMALE | WHITE | 73 | 674 |  |
| TCGA-55- 8299-01A-11R-  2287-07 | Tumor | LUAD | R0 | Stage IA | MX | N0 | T1b | Yes | Alive | FEMALE | WHITE | 61 | 469 |  |
| TCGA-55- 8301-01A-11R-  2287-07 | Tumor | LUAD | R0 | Stage IB | MX | N0 | T2a | Yes | Alive | MALE | WHITE | 58 | 534 |  |
| TCGA-55- 8302-01A-11R-  2326-07 | Tumor | LUAD | R0 | Stage IB | MX | N0 | T2 | Yes | Alive | MALE | WHITE | 54 | 478 |  |
| TCGA-55- 8505-01A-11R-  2403-07 | Tumor | LUAD | R0 | Stage IIIA | MX | N2 | T1a | No | Alive | MALE | WHITE | 62 | 440 |  |
| TCGA-55- 8506-01A-11R-  2403-07 | Tumor | LUAD | R0 | Stage IIB | MX | N0 | T3 | Yes | Alive | FEMALE | WHITE | 62 | 11 |  |
| TCGA-55- 8507-01A-11R-  2403-07 | Tumor | LUAD | R0 | Stage IA | MX | N0 | T1a | Yes | Alive | MALE | WHITE | 53 | 418 |  |
| TCGA-55- 8508-01A-11R-  2403-07 | Tumor | LUAD | R0 | Stage IIA | MX | N1 | T2a | Yes | Alive | FEMALE | BLACK OR AFRICAN AMERICAN | 60 | 617 |  |
| TCGA-55- 8510-01A-11R-  2403-07 | Tumor | LUAD | R0 | Stage IB | MX | N0 | T2a | Yes | Alive | FEMALE | WHITE | 55 | 539 |  |
| TCGA-55- 8511-01A-11R-  2403-07 | Tumor | LUAD | R0 | Stage IB | MX | N0 | T2a | Yes | Alive | FEMALE | WHITE | 73 | 552 |  |
| TCGA-55- 8512-01A-11R-  2403-07 | Tumor | LUAD | R0 | Stage IV | M1b | N1 | T1a | Yes | Alive | MALE | WHITE | 41 | 607 |  |
| TCGA-55- 8513-01A-11R-  2403-07 | Tumor | LUAD | R0 | Stage IIB | MX | N0 | T3 | No | Alive | FEMALE | WHITE | 77 | 791 |  |
| TCGA-55- 8514-01A-11R-  2403-07 | Tumor | LUAD | R0 | Stage IB | MX | N0 | T2a | Yes | Alive | FEMALE | BLACK OR AFRICAN AMERICAN | 70 | 520 |  |
| TCGA-55- 8614-01A-11R-  2403-07 | Tumor | LUAD | R0 | Stage IB | MX | N0 | T2a | Yes | Alive | MALE | WHITE | 76 | 536 |  |
| TCGA-55- 8615-01A-11R-  2403-07 | Tumor | LUAD | R0 | Stage IIIA | MX | N2 | T3 | Yes | Alive | MALE | WHITE | 67 | 446 |  |
| TCGA-55- 8616-01A-11R-  2403-07 | Tumor | LUAD | R0 | Stage IB | M0 | N0 | T2a | Yes | Alive | FEMALE | WHITE | 58 | 48 |  |
| TCGA-55- 8619-01A-11R-  2403-07 | Tumor | LUAD | R0 | Stage IIB | MX | N0 | T3 | No | Alive | FEMALE | WHITE | 72 | 416 |  |
| TCGA-55- 8620-01A-11R-  2403-07 | Tumor | LUAD | R0 | Stage IV | M1b | N1 | T1a | Yes | Alive | MALE | WHITE | 60 | 375 |  |
| TCGA-55- 8621-01A-11R-  2403-07 | Tumor | LUAD | R0 | Stage IA | MX | N0 | T1a | Yes | Alive | FEMALE | WHITE | 75 | 515 |  |
| TCGA-55- A48X-01A-11R- A24H-07 | Tumor | LUAD | R0 | Stage IIA | M0 | N1 | T1b | Yes | Alive | FEMALE | WHITE | 63 | 689 |  |
| TCGA-55-  A48Y-01A-11R- A24H-07 | Tumor | LUAD | R0 | Stage IIA | M0 | N0 | T2b | Yes | Alive | MALE | WHITE | 69 | 630 |  |
| TCGA-55- A48Z-01A-12R- A24X-07 | Tumor | LUAD | R0 | Stage IIIB | MX | N3 | T1a | Yes | Alive | FEMALE | WHITE | 60 | 651 |  |
| TCGA-55- A490-01A-11R- A466-07 | Tumor | LUAD | R0 | Stage IIA | MX | N0 | T2b | Yes | Alive | MALE | WHITE | 78 | 99 |  |
| TCGA-55- A491-01A-11R- A24H-07 | Tumor | LUAD | R0 | Stage IA | MX | N0 | T1b | Yes | Alive | FEMALE | WHITE | 81 | 626 |  |
| TCGA-55- A492-01A-11R- A24H-07 | Tumor | LUAD | R0 | Stage IA | MX | N0 | T1a | Yes | Alive | FEMALE | WHITE | 70 | 596 |  |
| TCGA-55- A493-01A-11R- A24H-07 | Tumor | LUAD | R0 | Stage IB | M0 | N0 | T2a | Yes | Alive | FEMALE | WHITE | 54 | 28 |  |
| TCGA-55- A494-01A-11R- A24X-07 | Tumor | LUAD | R0 | Stage IB | MX | N0 | T2a | Yes | Alive | FEMALE | WHITE | 61 | 481 |  |
| TCGA-55-  A4DF-01A- 11R-A24H-07 | Tumor | LUAD | R0 | Stage IA | MX | N0 | T1b | Yes | Alive | MALE | WHITE | 88 | 614 |  |
| TCGA-55- A4DG-01A- 11R-A24H-07 | Tumor | LUAD | R0 | Stage IA | MX | N0 | T1b | Yes | Alive | MALE | WHITE | 71 | 608 |  |
| TCGA-55- A57B-01A- 12R-A39D-07 | Tumor | LUAD | R0 | Stage IA | M0 | N0 | T1b | No | Alive | FEMALE | BLACK OR AFRICAN AMERICAN | 80 | 546 |  |
| TCGA-62- 8394-01A-11R-  2326-07 | Tumor | LUAD | R0 | Stage IIIB | M0 | N2 | T4 | No | Dead | FEMALE | WHITE | 65 | 139 |  |
| TCGA-62- 8395-01A-11R-  2326-07 | Tumor | LUAD | R0 | Stage IIB | M0 | N0 | T3 | No | Alive | FEMALE | WHITE | 80 | 1216 |  |
| TCGA-62- 8397-01A-11R-  2326-07 | Tumor | LUAD | R0 | Stage IIB | M0 | N0 | T3 | No | Alive | FEMALE | WHITE | 70 | 1289 |  |
| TCGA-62- 8398-01A-11R-  2326-07 | Tumor | LUAD | R0 | Stage IIIA | M0 | N2 | T2 | Yes | Dead | MALE | WHITE | 55 | 444 |  |
| TCGA-62- 8399-01A-21R-  2326-07 | Tumor | LUAD | R0 | Stage IIIA | M0 | N2 | T2 | Yes | Alive | MALE | WHITE | 62 | 2696 |  |
| TCGA-62- 8402-01A-11R-  2326-07 | Tumor | LUAD | R0 | Stage IIIA | M0 | N2 | T2 | No | Alive | FEMALE | WHITE | 73 | 1498 |  |
| TCGA-62- A46O-01A- 11R-A24H-07 | Tumor | LUAD | R0 | Stage IB | M0 | N0 | T2 | Yes | Dead | FEMALE | WHITE | 65 | 1454 |  |
| TCGA-62- A46P-01A-11R- A24H-07 | Tumor | LUAD | R0 | Stage IB | M0 | N0 | T2 | Yes | Dead | MALE | WHITE | 65 | 594 |  |
| TCGA-62- A46R-01A- 11R-A24H-07 | Tumor | LUAD | R0 | Stage IB | M0 | N0 | T2 | Yes | Dead | FEMALE | WHITE | 54 | 1725 |  |
| TCGA-62- A46S-01A-11R- A24H-07 | Tumor | LUAD | R0 | Stage IB | M0 | N0 | T2 | Yes | Dead | MALE | WHITE | 73 | 1653 |  |
| TCGA-62-  A46V-01A-11R- A24H-07 | Tumor | LUAD | R0 | Stage IB | M0 | N0 | T2 | Yes | Alive | FEMALE | WHITE | 78 | 2199 |  |
| TCGA-62- A46Y-01A-11R- A24H-07 | Tumor | LUAD | R0 | Stage IIIA | M0 | N2 | T2 | No | Dead | FEMALE | WHITE | 70 | 414 |  |
| TCGA-62- A470-01A-11R- A24H-07 | Tumor | LUAD | R0 | Stage IB | M0 | N0 | T2 | Yes | Dead | MALE | WHITE | 84 | 1194 |  |
| TCGA-62- A471-01A-12R- A24H-07 | Tumor | LUAD | R0 | Stage IIB | M0 | N1 | T2b | Yes | Alive | MALE | WHITE | 64 | 1246 |  |
| TCGA-62- A472-01A-11R- A24H-07 | Tumor | LUAD | R0 | Stage IIB | M0 | N0 | T3 | Yes | Alive | MALE | WHITE | 70 | 910 |  |
| TCGA-64- 1676-01A-01R-  0946-07 | Tumor | LUAD | R0 | Stage IA | M0 | N0 | T1a | Yes | Alive | MALE | WHITE | 58 | 1728 |  |
| TCGA-64- 1677-01A-01R-  0946-07 | Tumor | LUAD | R0 | Stage IIIA | M0 | N2 | T2 | Yes | Dead | FEMALE | WHITE | 77 | 628 |  |
| TCGA-64- 1678-01A-01R-  0946-07 | Tumor | LUAD | R0 | Discrepancy | M0 | N0 | T2b | Yes | Alive | FEMALE | WHITE | 70 | 1189 |  |
| TCGA-64- 1679-01A-21R-  2066-07 | Tumor | LUAD | R0 | Stage IIIA | M0 | N2 | T1 | Yes | Alive | FEMALE | WHITE | 58 | 2488 |  |
| TCGA-64- 1680-01A-02R-  0946-07 | Tumor | LUAD | R0 | Stage IV | M1 | N2 | T2a | Yes | Alive | MALE | WHITE | 63 | 1126 |  |
| TCGA-64- 1681-01A-11R-  2066-07 | Tumor | LUAD | R0 | Stage IA | M0 | N0 | T1 | Yes | Dead | FEMALE | WHITE | 61 | 1167 |  |
| TCGA-64- 5774-01A-01R-  1628-07 | Tumor | LUAD | R0 | Stage IB | M0 | N0 | T2 | Yes | Alive | MALE | WHITE | 60 | 2676 |  |
| TCGA-64- 5775-01A-01R-  1628-07 | Tumor | LUAD | R0 | Stage IIIA | M0 | N0 | T4 | Yes | Dead | MALE | WHITE | 71 | 62 |  |
| TCGA-64- 5778-01A-01R-  1628-07 | Tumor | LUAD | R0 | Stage IB | M0 | N0 | T2 | Yes | Alive | MALE | WHITE | 60 | 1305 |  |
| TCGA-64- 5779-01A-01R-  1628-07 | Tumor | LUAD | R0 | Stage IIIA | M0 | N2 | T2 | Yes | Alive | MALE | WHITE | 61 | 864 |  |
| TCGA-64- 5781-01A-01R-  1628-07 | Tumor | LUAD | R0 | Stage IB | M0 | N0 | T2 | Yes | Alive | FEMALE | WHITE | 55 | 1559 |  |
| TCGA-64- 5815-01A-01R-  1628-07 | Tumor | LUAD | R0 | Stage IIB | M0 | N1 | T2 | Yes | Alive | MALE | WHITE | 74 | 866 |  |
| TCGA-67- 3770-01A-01R-  0946-07 | Tumor | LUAD | R0 | Stage IA | M0 | N0 | T1 | Yes | Alive | FEMALE | WHITE | 70 | 610 |  |
| TCGA-67- 3771-01A-01R-  0946-07 | Tumor | LUAD | R0 | Stage IA | M0 | N0 | T1 | Yes | Alive | FEMALE | BLACK OR AFRICAN AMERICAN | 77 | 610 |  |
| TCGA-67- 3772-01A-01R-  0946-07 | Tumor | LUAD | Not Available | Stage IB | M0 | N0 | T2 | No | Alive | FEMALE | WHITE | 82 | 573 |  |
| TCGA-67- 3773-01A-01R-  0946-07 | Tumor | LUAD | R0 | Stage IB | M0 | N0 | T2 | Yes | Alive | FEMALE | WHITE | 84 | 427 |  |
| TCGA-67- 3774-01A-01R-  0946-07 | Tumor | LUAD | RX | Stage IB | M0 | N0 | T2 | Yes | Alive | FEMALE | WHITE | 73 | 385 |  |
| TCGA-67- 4679-01B-01R-  1755-07 | Tumor | LUAD | R0 | Discrepancy | M0 | N0 | T3 | Yes | Alive | MALE | WHITE | 69 | 448 |  |
| TCGA-67- 6215-01A-11R-  1755-07 | Tumor | LUAD | R0 | Stage IB | M0 | N0 | T2a | No | Alive | FEMALE | WHITE | 52 | 174 |  |
| TCGA-67- 6216-01A-11R-  1755-07 | Tumor | LUAD | R0 | Stage IA | M0 | N0 | T1a | No | Alive | FEMALE | WHITE | 57 | 141 |  |
| TCGA-67- 6217-01A-11R-  1755-07 | Tumor | LUAD | R0 | Stage IIA | M0 | N1 | T2a | Yes | Alive | FEMALE | WHITE | 73 | 422 |  |
| TCGA-69- 7760-01A-11R-  2170-07 | Tumor | LUAD | Not Available | Stage IIB | M0 | N0 | T3 | No | Alive | MALE | WHITE | 73 | 202 |  |
| TCGA-69- 7761-01A-11R-  2170-07 | Tumor | LUAD | Not Available | Stage IB | MX | N0 | T2a | Yes | Alive | MALE | WHITE | 84 | 186 |  |
| TCGA-69- 7763-01A-11R-  2170-07 | Tumor | LUAD | Not Available | Stage IA | M0 | N0 | T1b | Yes | Alive | MALE | WHITE | 69 | 690 |  |
| TCGA-69- 7764-01A-11R-  2170-07 | Tumor | LUAD | Not Available | Stage IA | M0 | N0 | T1b | Yes | Alive | MALE | WHITE | 75 | 414 |  |
| TCGA-69- 7765-01A-11R-  2170-07 | Tumor | LUAD | Not Available | Discrepancy | MX | N0 | T4 | Yes | Alive | MALE | BLACK OR AFRICAN AMERICAN | 56 | 165 |  |
| TCGA-69- 7973-01A-11R-  2187-07 | Tumor | LUAD | Not Available | Stage IB | M0 | N0 | T2a | Yes | Alive | FEMALE | WHITE | 42 | 230 |  |
| TCGA-69- 7974-01A-11R-  2187-07 | Tumor | LUAD | Not Available | Stage IIIA | MX | N2 | T2a | Yes | Alive | FEMALE | WHITE | 54 | 184 |  |
| TCGA-69- 7978-01A-11R-  2187-07 | Tumor | LUAD | Not Available | Stage IIB | MX | N1 | T2b | Yes | Alive | MALE | WHITE | 59 | 134 |  |
| TCGA-69- 7979-01A-11R-  2187-07 | Tumor | LUAD | Not Available | Stage IB | MX | N0 | T2a | Yes | Alive | FEMALE | WHITE | 71 | 408 |  |
| TCGA-69- 7980-01A-11R-  2187-07 | Tumor | LUAD | Not Available | Stage I | M0 | N0 | T1b | Yes | Alive | FEMALE | WHITE | 70 | 411 |  |
| TCGA-69- 8253-01A-11R-  2287-07 | Tumor | LUAD | Not Available | Stage IIA | MX | N1 | T1a | Yes | Alive | FEMALE | BLACK OR AFRICAN AMERICAN | 59 | 426 |  |
| TCGA-69- 8254-01A-11R-  2287-07 | Tumor | LUAD | Not Available | Not Available | Not Available | Not Available | T2b | Yes | Alive | MALE | WHITE | 85 | 409 |  |
| TCGA-69- 8255-01A-11R-  2287-07 | Tumor | LUAD | Not Available | Stage IA | M0 | N0 | T1a | Yes | Alive | MALE | WHITE | 71 | 129 |  |
| TCGA-69- 8453-01A-12R-  2326-07 | Tumor | LUAD | Not Available | Stage IIB | MX | N0 | T3 | Yes | Alive | MALE | WHITE | 77 | 813 |  |
| TCGA-69- A59K-01A-11R- A262-07 | Tumor | LUAD | Not Evaluated | Stage IIB | M0 | N0 | T3 | Yes | Alive | FEMALE | BLACK OR AFRICAN AMERICAN | 60 | 591 |  |
| TCGA-71- 6725-01A-11R-  1858-07 | Tumor | LUAD | RX | Stage IB | M0 | N0 | T2 | Yes | Alive | FEMALE | ASIAN | 48 | 256 |  |
| TCGA-71- 8520-01A-11R-  2403-07 | Tumor | LUAD | R0 | Stage IB | M0 | N0 | T2 | No | Alive | FEMALE | ASIAN | 60 | 210 |  |
| TCGA-73- 4658-01A-01R-  1755-07 | Tumor | LUAD | R0 | Stage IB | M0 | N0 | T2 | Yes | Dead | FEMALE | WHITE | 80 | 1600 |  |
| TCGA-73- 4659-01A-01R-  1206-07 | Tumor | LUAD | R0 | Stage IIIA | M0 | N2 | T2 | Yes | Dead | MALE | WHITE | 66 | 711 |  |
| TCGA-73- 4662-01A-01R-  1206-07 | Tumor | LUAD | R0 | Stage IA | M0 | N0 | T1 | Yes | Alive | FEMALE | WHITE | 65 | 2515 |  |
| TCGA-73- 4666-01A-01R-  1206-07 | Tumor | LUAD | R0 | Stage IV | M1 | N0 | T1 | Yes | Alive | FEMALE | WHITE | 52 | 800 |  |
| TCGA-73- 4668-01A-01R-  1206-07 | Tumor | LUAD | R0 | Stage IIB | M0 | N1 | T2 | Yes | Alive | FEMALE | AMERICAN INDIAN OR ALASKA NATIVE | 66 | 467 |  |
| TCGA-73- 4670-01A-01R-  1206-07 | Tumor | LUAD | R0 | Stage IV | M1 | N0 | T2 | Yes | Alive | FEMALE | WHITE | 69 | 131 |  |
| TCGA-73- 4675-01A-01R-  1206-07 | Tumor | LUAD | RX | Stage IIIA | M0 | N1 | T3 | Yes | Alive | MALE | WHITE | 59 | 922 |  |
| TCGA-73- 4676-01A-01R-  1755-07 | Tumor | LUAD | R0 | Stage IIA | M0 | N1 | T2a | Yes | Alive | MALE | WHITE | 45 | 281 |  |
| TCGA-73- 4676-11A-01R-  1755-07 | Normal | LUAD | R0 | Stage IIA | M0 | N1 | T2a | Yes | Alive | MALE | WHITE | 45 | 281 |  |
| TCGA-73- 4677-01A-01R-  1206-07 | Tumor | LUAD | R0 | Discrepancy | M0 | N0 | T2a | Yes | Dead | MALE | WHITE | 74 | 38 |  |
| TCGA-73- 7498-01A-12R-  2187-07 | Tumor | LUAD | R0 | Stage IA | M0 | N0 | T1b | Yes | Alive | FEMALE | WHITE | 58 | 1189 |  |
| TCGA-73- 7499-01A-11R-  2187-07 | Tumor | LUAD | R0 | Stage IB | M0 | N0 | T2a | No | Alive | FEMALE | WHITE | 81 | 1531 |  |
| TCGA-73- A9RS-01A- 11R-A41B-07 | Tumor | LUAD | R0 | Stage IIB | M0 | N0 | T3 | Yes | Alive | MALE | BLACK OR AFRICAN AMERICAN | 41 | 340 |  |
| TCGA-75- 5122-01A-01R-  1755-07 | Tumor | LUAD | R0 | Stage IB | M0 | N0 | T2 | Yes | Dead | MALE | Not Available | Not Available |  |  |
| TCGA-75- 5125-01A-01R-  1755-07 | Tumor | LUAD | R0 | Stage IIB | M0 | N1 | T2 | Yes | Alive | MALE | Not Available | Not Available | 2027 |  |
| TCGA-75- 5126-01A-01R-  1755-07 | Tumor | LUAD | R2 | Stage IIIA | M0 | N2 | T3 | Yes | Alive | FEMALE | Not Available | Not Available |  |  |
| TCGA-75- 5146-01A-01R-  1628-07 | Tumor | LUAD | R0 | Stage IB | M0 | N0 | T2 | Yes | Alive | MALE | Not Available | Not Available | 2368 |  |
| TCGA-75- 5147-01A-01R-  1628-07 | Tumor | LUAD | R0 | Stage IB | M0 | N0 | T2 | No | Alive | FEMALE | Not Available | Not Available | 1333 |  |
| TCGA-75- 6203-01A-11R-  1755-07 | Tumor | LUAD | R0 | Stage IIIA | M0 | N2 | T2 | No | Alive | FEMALE | Not Available | Not Available |  |  |
| TCGA-75- 6205-01A-11R-  1755-07 | Tumor | LUAD | R0 | Stage IB | M0 | N0 | T2a | No | Dead | FEMALE | Not Available | Not Available |  |  |
| TCGA-75- 6206-01A-11R-  1755-07 | Tumor | LUAD | R0 | Stage IB | M0 | N0 | T2 | Yes | Alive | MALE | Not Available | Not Available | 2590 |  |
| TCGA-75- 6207-01A-11R-  1755-07 | Tumor | LUAD | R0 | Stage IIIA | M0 | N2 | T2 | Yes | Dead | MALE | Not Available | Not Available |  |  |
| TCGA-75- 6211-01A-11R-  1755-07 | Tumor | LUAD | R0 | Stage IB | M0 | N0 | T2 | Yes | Dead | FEMALE | Not Available | Not Available |  |  |
| TCGA-75- 6212-01A-11R-  1755-07 | Tumor | LUAD | R0 | Stage IIB | M0 | N1 | T2 | No | Alive | FEMALE | Not Available | Not Available | 1516 |  |
| TCGA-75- 6214-01A-41R-  1949-07 | Tumor | LUAD | R0 | Stage IIIA | M0 | N2 | T2 | Yes | Alive | FEMALE | Not Available | Not Available | 1115 |  |
| TCGA-75- 7025-01A-12R-  1949-07 | Tumor | LUAD | R0 | Stage IB | M0 | N0 | T2 | Yes | Alive | MALE | Not Available | Not Available | 3305 |  |
| TCGA-75- 7027-01A-11R-  1949-07 | Tumor | LUAD | R0 | Stage IB | M0 | N0 | T2 | Yes | Alive | MALE | Not Available | Not Available | 3059 |  |
| TCGA-75- 7030-01A-11R-  1949-07 | Tumor | LUAD | R0 | Stage IIB | M0 | N0 | T3 | No | Alive | MALE | Not Available | Not Available |  |  |
| TCGA-75- 7031-01A-11R-  1949-07 | Tumor | LUAD | R0 | Stage IB | M0 | N0 | T2 | Yes | Alive | FEMALE | Not Available | Not Available |  |  |
| TCGA-78- 7143-01A-11R-  2039-07 | Tumor | LUAD | R0 | Stage IB | M0 | N0 | T2 | No | Dead | FEMALE | WHITE | 62 | 4961 |  |
| TCGA-78- 7145-01A-11R-  2039-07 | Tumor | LUAD | R1 | Stage IV | M1 | N1 | T4 | Yes | Dead | FEMALE | WHITE | 52 | 826 |  |
| TCGA-78- 7146-01A-11R-  2039-07 | Tumor | LUAD | R0 | Stage IIIA | M0 | N2 | T2 | Yes | Dead | FEMALE | WHITE | 71 | 173 |  |
| TCGA-78- 7147-01A-11R-  2039-07 | Tumor | LUAD | R0 | Stage IIB | M0 | N1 | T2 | Yes | Dead | FEMALE | WHITE | 67 | 586 |  |
| TCGA-78- 7148-01A-11R-  2039-07 | Tumor | LUAD | R0 | Stage IIB | M0 | N1 | T2 | Yes | Dead | MALE | WHITE | 71 | 626 |  |
| TCGA-78- 7149-01A-11R-  2039-07 | Tumor | LUAD | R0 | Stage IIIB | M0 | N0 | T4 | Yes | Alive | MALE | WHITE | 71 | 3940 |  |
| TCGA-78- 7150-01A-21R-  2039-07 | Tumor | LUAD | R0 | Stage IIB | M0 | N1 | T2 | Yes | Dead | MALE | WHITE | 59 | 666 |  |
| TCGA-78- 7152-01A-11R-  2039-07 | Tumor | LUAD | R0 | Stage IB | M0 | N0 | T2 | Yes | Alive | MALE | WHITE | 65 | 1215 |  |
| TCGA-78- 7153-01A-11R-  2039-07 | Tumor | LUAD | R0 | Stage IB | M0 | N0 | T2 | Yes | Alive | FEMALE | WHITE | 65 | 3635 |  |
| TCGA-78- 7154-01A-11R-  2039-07 | Tumor | LUAD | R0 | Stage IIIA | M0 | N2 | T3 | Yes | Dead | MALE | WHITE | 72 | 593 |  |
| TCGA-78- 7155-01A-11R-  2039-07 | Tumor | LUAD | R0 | Stage IB | M0 | N0 | T2 | Yes | Dead | MALE | WHITE | 68 | 1171 |  |
| TCGA-78- 7156-01A-11R-  2039-07 | Tumor | LUAD | R0 | Stage IV | M1 | N1 | T4 | Yes | Dead | MALE | WHITE | 62 | 976 |  |
| TCGA-78- 7158-01A-11R-  2039-07 | Tumor | LUAD | R1 | Stage IIIB | M0 | N2 | T4 | Yes | Dead | FEMALE | WHITE | 59 | 179 |  |
| TCGA-78- 7159-01A-11R-  2039-07 | Tumor | LUAD | R0 | Stage IA | M0 | NX | T1 | Yes | Alive | FEMALE | WHITE | 60 | 1974 |  |
| TCGA-78- 7160-01A-11R-  2039-07 | Tumor | LUAD | R0 | Stage IV | M1 | N2 | T4 | Yes | Alive | MALE | WHITE | 61 | 697 |  |
| TCGA-78- 7161-01A-11R-  2039-07 | Tumor | LUAD | R1 | Stage IIB | M0 | N0 | T3 | Yes | Alive | FEMALE | WHITE | 69 | 291 |  |
| TCGA-78- 7162-01A-21R-  2066-07 | Tumor | LUAD | R0 | Stage IA | M0 | N0 | T1 | Yes | Dead | MALE | WHITE | 75 | 3169 |  |
| TCGA-78- 7163-01A-12R-  2066-07 | Tumor | LUAD | R0 | Stage IB | M0 | N0 | T2 | Yes | Alive | MALE | WHITE | 60 | 7248 |  |
| TCGA-78- 7166-01A-12R-  2066-07 | Tumor | LUAD | R0 | Stage IIB | M0 | N1 | T2 | Yes | Dead | MALE | WHITE | 84 | 258 |  |
| TCGA-78- 7167-01A-11R-  2066-07 | Tumor | LUAD | R0 | Stage IV | M1 | N0 | T2 | Yes | Dead | MALE | WHITE | 77 | 2681 |  |
| TCGA-78- 7220-01A-11R-  2039-07 | Tumor | LUAD | R0 | Stage IIIA | M0 | N2 | T2 | Yes | Dead | FEMALE | WHITE | 53 | 807 |  |
| TCGA-78- 7535-01A-11R-  2066-07 | Tumor | LUAD | R0 | Stage IB | M0 | N0 | T2 | Yes | Dead | MALE | WHITE | 45 | 949 |  |
| TCGA-78- 7536-01A-11R-  2066-07 | Tumor | LUAD | R0 | Stage IIIA | M0 | N2 | T2 | Yes | Dead | MALE | WHITE | 69 | 244 |  |
| TCGA-78- 7537-01A-11R-  2066-07 | Tumor | LUAD | R0 | Stage IB | M0 | N0 | T2 | Yes | Dead | MALE | Not Available | 72 | 1622 |  |
| TCGA-78- 7539-01A-11R-  2066-07 | Tumor | LUAD | R0 | Stage IIA | M0 | N0 | T2b | Yes | Alive | FEMALE | WHITE | 75 | 791 |  |
| TCGA-78- 7540-01A-11R-  2066-07 | Tumor | LUAD | R0 | Stage IB | M0 | N0 | T2 | No | Alive | FEMALE | WHITE | 66 | 1197 |  |
| TCGA-78- 7542-01A-21R-  2066-07 | Tumor | LUAD | R0 | Stage IB | M0 | N0 | T2 | Yes | Dead | MALE | WHITE | 56 | 321 |  |
| TCGA-78- 7633-01A-11R-  2066-07 | Tumor | LUAD | R0 | Stage IB | M0 | N0 | T2 | Yes | Alive | MALE | WHITE | 67 | 1528 |  |
| TCGA-78- 8640-01A-11R-  2403-07 | Tumor | LUAD | R0 | Stage IIA | M0 | N1 | T1 | Yes | Alive | MALE | Not Evaluated | 59 | 7062 |  |
| TCGA-78- 8648-01A-11R-  2403-07 | Tumor | LUAD | R0 | Stage IIB | M0 | N0 | T3 | Yes | Dead | FEMALE | Not Evaluated | 58 | 1209 |  |
| TCGA-78- 8655-01A-11R-  2403-07 | Tumor | LUAD | R0 | Stage IA | M0 | N0 | T1 | Yes | Alive | FEMALE | Not Evaluated | 77 | 2360 |  |
| TCGA-78- 8660-01A-11R-  2403-07 | Tumor | LUAD | R0 | Stage IIB | M0 | N1 | T2 | Yes | Dead | MALE | Not Evaluated | 69 | 321 |  |
| TCGA-78- 8662-01A-11R-  2403-07 | Tumor | LUAD | R0 | Stage IB | M0 | N0 | T2 | Yes | Dead | FEMALE | Not Evaluated | 53 | 3361 |  |
| TCGA-80- 5607-01A-31R-  1949-07 | Tumor | LUAD | R0 | Stage IIB | M0 | N1 | T2 | Yes | Alive | FEMALE | Not Available | Not Available |  |  |
| TCGA-80- 5608-01A-31R-  1949-07 | Tumor | LUAD | R0 | Stage IA | M0 | N0 | T1 | Yes | Alive | FEMALE | Not Available | Not Available | 2832 |  |
| TCGA-80- 5611-01A-01R-  1628-07 | Tumor | LUAD | R0 | Stage IB | M0 | N0 | T2 | Yes | Alive | MALE | Not Available | Not Available | 2595 |  |
| TCGA-83- 5908-01A-21R-  2287-07 | Tumor | LUAD | R0 | Stage IA | M0 | N0 | T1 | Yes | Alive | FEMALE | WHITE | 59 | 824 |  |
| TCGA-86- 6562-01A-11R-  1755-07 | Tumor | LUAD | R0 | Stage IIA | M0 | N1 | T2a | No | Alive | MALE | WHITE | 52 | 376 |  |
| TCGA-86- 6851-01A-11R-  1949-07 | Tumor | LUAD | Not Available | Stage IIA | M0 | N1 | T1b | Yes | Alive | FEMALE | WHITE | 73 | 179 |  |
| TCGA-86- 7701-01A-11R-  2170-07 | Tumor | LUAD | R0 | Stage IV | M1 | N0 | T2 | No | Alive | MALE | WHITE | 66 | 947 |  |
| TCGA-86- 7711-01A-11R-  2066-07 | Tumor | LUAD | R0 | Stage IIA | M0 | N1 | T2a | Yes | Alive | MALE | WHITE | 70 | 1046 |  |
| TCGA-86- 7713-01A-11R-  2066-07 | Tumor | LUAD | R0 | Stage IIA | M0 | N0 | T2b | No | Alive | MALE | WHITE | 70 | 1157 |  |
| TCGA-86- 7714-01A-12R-  2170-07 | Tumor | LUAD | R0 | Stage IIIA | M0 | N2 | T1b | Yes | Alive | FEMALE | BLACK OR AFRICAN AMERICAN | 61 | 625 |  |
| TCGA-86- 7953-01A-11R-  2187-07 | Tumor | LUAD | RX | Stage IA | M0 | N0 | T1b | No | Alive | FEMALE | WHITE | 69 | 997 |  |
| TCGA-86- 7954-01A-11R-  2187-07 | Tumor | LUAD | R0 | Stage IB | M0 | N0 | T2 | Yes | Alive | FEMALE | WHITE | 68 | 605 |  |
| TCGA-86- 7955-01A-11R-  2187-07 | Tumor | LUAD | RX | Stage IB | M0 | N0 | T2a | No | Alive | MALE | WHITE | 62 | 1072 |  |
| TCGA-86- 8054-01A-11R-  2241-07 | Tumor | LUAD | R0 | Stage IIB | M0 | N1 | T2b | Yes | Alive | MALE | WHITE | 61 | 1148 |  |
| TCGA-86- 8055-01A-11R-  2241-07 | Tumor | LUAD | R0 | Stage IIA | M0 | N1 | T2a | Yes | Alive | MALE | WHITE | 79 | 124 |  |
| TCGA-86- 8056-01A-11R-  2241-07 | Tumor | LUAD | R0 | Stage IIIA | M0 | N0 | T4 | Yes | Alive | FEMALE | WHITE | 63 | 139 |  |
| TCGA-86- 8073-01A-11R-  2241-07 | Tumor | LUAD | R0 | Stage IB | M0 | N0 | T2a | Yes | Alive | MALE | WHITE | 58 | 740 |  |
| TCGA-86- 8074-01A-11R-  2241-07 | Tumor | LUAD | R0 | Stage IIA | M0 | N1 | T1b | Yes | Alive | FEMALE | WHITE | 62 | 24 |  |
| TCGA-86- 8075-01A-11R-  2241-07 | Tumor | LUAD | R0 | Stage IB | M0 | N0 | T2 | No | Alive | FEMALE | WHITE | 66 | 694 |  |
| TCGA-86- 8076-01A-31R-  2241-07 | Tumor | LUAD | R0 | Stage IA | M0 | N0 | T1 | No | Alive | MALE | WHITE | 42 | 993 |  |
| TCGA-86- 8278-01A-11R-  2287-07 | Tumor | LUAD | R0 | Stage IIB | M0 | N1 | T2 | No | Alive | FEMALE | WHITE | 63 | 944 |  |
| TCGA-86- 8279-01A-11R-  2287-07 | Tumor | LUAD | R0 | Stage IIA | M0 | N1 | T2a | No | Alive | MALE | WHITE | 46 | 949 |  |
| TCGA-86- 8280-01A-11R-  2287-07 | Tumor | LUAD | R0 | Stage IIA | M0 | N0 | T2b | No | Alive | FEMALE | WHITE | 54 | 701 |  |
| TCGA-86- 8281-01A-11R-  2287-07 | Tumor | LUAD | Not Evaluated | Stage IA | M0 | NX | T1 | Yes | Alive | MALE | WHITE | 75 | 0 |  |
| TCGA-86- 8358-01A-11R-  2326-07 | Tumor | LUAD | R0 | Stage IB | M0 | N0 | T2a | Yes | Alive | MALE | WHITE | 44 | 653 |  |
| TCGA-86- 8359-01A-11R-  2326-07 | Tumor | LUAD | R0 | Stage IIIA | M0 | N2 | T3 | Yes | Alive | MALE | WHITE | 52 | 444 |  |
| TCGA-86- 8585-01A-11R-  2403-07 | Tumor | LUAD | R0 | Stage IB | M0 | N0 | T2a | No | Alive | MALE | WHITE | 57 | 353 |  |
| TCGA-86- 8668-01A-11R-  2403-07 | Tumor | LUAD | R0 | Stage IA | M0 | N0 | T1b | No | Alive | FEMALE | WHITE | 61 | 423 |  |
| TCGA-86- 8669-01A-11R-  2403-07 | Tumor | LUAD | R0 | Stage IA | M0 | N0 | T1b | Yes | Alive | MALE | WHITE | 64 | 938 |  |
| TCGA-86- 8671-01A-11R-  2403-07 | Tumor | LUAD | R0 | Stage IIB | M0 | N1 | T2b | No | Alive | FEMALE | WHITE | 72 | 839 |  |
| TCGA-86- 8672-01A-21R-  2403-07 | Tumor | LUAD | R0 | Stage IIB | M0 | N0 | T3 | No | Alive | MALE | WHITE | 59 | 19 |  |
| TCGA-86- 8673-01A-11R-  2403-07 | Tumor | LUAD | R0 | Stage IB | M0 | N0 | T2 | Yes | Alive | MALE | WHITE | 61 | 862 |  |
| TCGA-86- 8674-01A-21R-  2403-07 | Tumor | LUAD | R0 | Stage IIA | M0 | N1 | T2a | Yes | Alive | MALE | WHITE | 50 | 806 |  |
| TCGA-86- A456-01A-11R- A24H-07 | Tumor | LUAD | R0 | Stage IA | M0 | N0 | T1a | Yes | Alive | FEMALE | ASIAN | 78 | 896 |  |
| TCGA-86-  A4D0-01A- 11R-A24H-07 | Tumor | LUAD | R0 | Stage IIA | M0 | N0 | T2b | Yes | Alive | MALE | WHITE | 48 | 116 |  |
| TCGA-86- A4JF-01A-11R- A24X-07 | Tumor | LUAD | R0 | Stage IIB | M0 | N0 | T3 | Yes | Alive | MALE | WHITE | 56 | 737 |  |
| TCGA-86- A4P7-01A-11R- A24X-07 | Tumor | LUAD | R0 | Stage IB | M0 | N0 | T2a | No | Alive | FEMALE | WHITE | 63 | 415 |  |
| TCGA-86- A4P8-01A-11R- A24X-07 | Tumor | LUAD | Not Evaluated | Stage IIIA | MX | N2 | T1b | No | Alive | FEMALE | WHITE | 59 | 805 |  |
| TCGA-91- 6828-01A-11R-  1858-07 | Tumor | LUAD | R0 | Stage IA | M0 | N0 | T1a | Yes | Alive | MALE | WHITE | 70 | 323 |  |
| TCGA-91- 6828-11A-01R-  1858-07 | Normal | LUAD | R0 | Stage IA | M0 | N0 | T1a | Yes | Alive | MALE | WHITE | 70 | 323 |  |
| TCGA-91- 6829-01A-21R-  1858-07 | Tumor | LUAD | R0 | Stage IB | MX | N0 | T2 | Yes | Dead | MALE | WHITE | 78 | 1258 |  |
| TCGA-91- 6829-11A-01R-  1858-07 | Normal | LUAD | R0 | Stage IB | MX | N0 | T2 | Yes | Dead | MALE | WHITE | 78 | 1258 |  |
| TCGA-91- 6830-01A-11R-  1949-07 | Tumor | LUAD | Not Available | Stage IIA | MX | N1 | T1 | Yes | Alive | FEMALE | WHITE | 65 | 60 |  |
| TCGA-91- 6831-01A-11R-  1858-07 | Tumor | LUAD | Not Available | Stage IB | MX | N0 | T2 | Yes | Alive | MALE | WHITE | 66 | 310 |  |
| TCGA-91- 6831-11A-02R-  1858-07 | Normal | LUAD | Not Available | Stage IB | MX | N0 | T2 | Yes | Alive | MALE | WHITE | 66 | 310 |  |
| TCGA-91- 6835-01A-11R-  1858-07 | Tumor | LUAD | R0 | Stage IA | M0 | N0 | T1 | Yes | Alive | FEMALE | WHITE | 81 | 79 |  |
| TCGA-91- 6835-11A-01R-  1858-07 | Normal | LUAD | R0 | Stage IA | M0 | N0 | T1 | Yes | Alive | FEMALE | WHITE | 81 | 79 |  |
| TCGA-91- 6836-01A-21R-  1858-07 | Tumor | LUAD | Not Available | Stage IB | MX | N0 | T2 | Yes | Alive | FEMALE | WHITE | 52 | 417 |  |
| TCGA-91- 6836-11A-01R-  1858-07 | Normal | LUAD | Not Available | Stage IB | MX | N0 | T2 | Yes | Alive | FEMALE | WHITE | 52 | 417 |  |
| TCGA-91- 6840-01A-11R-  1949-07 | Tumor | LUAD | R0 | Stage IA | M0 | N0 | T1b | Yes | Alive | FEMALE | WHITE | 59 | 372 |  |
| TCGA-91- 6847-01A-11R-  1949-07 | Tumor | LUAD | Not Available | Stage IB | MX | N0 | T2 | Yes | Alive | FEMALE | WHITE | 62 | 842 |  |
| TCGA-91- 6847-11A-01R-  1949-07 | Normal | LUAD | Not Available | Stage IB | MX | N0 | T2 | Yes | Alive | FEMALE | WHITE | 62 | 842 |  |
| TCGA-91- 6848-01A-11R-  1949-07 | Tumor | LUAD | Not Available | Stage IIIA | MX | N2 | T2 | Yes | Alive | MALE | WHITE | 59 | 224 |  |
| TCGA-91- 6849-01A-11R-  1949-07 | Tumor | LUAD | Not Available | Stage IIIA | MX | N2 | T2 | Yes | Alive | FEMALE | BLACK OR AFRICAN AMERICAN | 75 | 35 |  |
| TCGA-91- 6849-11A-01R-  1949-07 | Normal | LUAD | Not Available | Stage IIIA | MX | N2 | T2 | Yes | Alive | FEMALE | BLACK OR AFRICAN AMERICAN | 75 | 35 |  |
| TCGA-91- 7771-01A-11R-  2170-07 | Tumor | LUAD | Not Available | Stage IIB | MX | N0 | T3 | Yes | Alive | MALE | WHITE | 62 | 492 |  |
| TCGA-91- 8496-01A-11R-  2403-07 | Tumor | LUAD | Not Evaluated | Stage IB | MX | NX | T2a | No | Alive | FEMALE | WHITE | 63 | 505 |  |
| TCGA-91- 8497-01A-11R-  2403-07 | Tumor | LUAD | Not Evaluated | Stage IA | MX | N0 | T1a | No | Alive | FEMALE | WHITE | 75 | 434 |  |
| TCGA-91- 8499-01A-11R-  2403-07 | Tumor | LUAD | Not Evaluated | Stage IA | MX | N0 | T1b | Yes | Alive | FEMALE | WHITE | 76 | 36 |  |
| TCGA-91-  A4BC-01A- 11R-A24H-07 | Tumor | LUAD | Not Evaluated | Stage IIA | MX | N0 | T2b | Yes | Alive | MALE | WHITE | 59 | 44 |  |
| TCGA-91- A4BD-01A- 11R-A24H-07 | Tumor | LUAD | RX | Stage IIA | MX | N1 | T1b | Yes | Alive | MALE | WHITE | 78 | 603 |  |
| TCGA-93- 7347-01A-11R-  2187-07 | Tumor | LUAD | R0 | Stage IA | MX | N0 | T1a | Yes | Alive | FEMALE | WHITE | 76 | 683 |  |
| TCGA-93- 7348-01A-21R-  2039-07 | Tumor | LUAD | R0 | Stage IA | MX | N0 | T1a | Yes | Alive | FEMALE | WHITE | 75 | 531 |  |
| TCGA-93- 8067-01A-11R-  2287-07 | Tumor | LUAD | RX | Stage IB | MX | N0 | T2a | Yes | Alive | MALE | ASIAN | 77 | 186 |  |
| TCGA-93- A4JN-01A-11R- A24X-07 | Tumor | LUAD | RX | Stage IV | M1a | N0 | T2a | Yes | Alive | MALE | WHITE | 71 | 718 |  |
| TCGA-93- A4JO-01A- 21R-A24X-07 | Tumor | LUAD | RX | Stage IA | MX | N0 | T1a | Yes | Dead | MALE | WHITE | 70 | 33 |  |
| TCGA-93-  A4JP-01A-11R- A24X-07 | Tumor | LUAD | RX | Stage IV | M1b | NX | TX | No | Alive | MALE | ASIAN | 64 | 578 |  |
| TCGA-93- A4JQ-01A- 11R-A24X-07 | Tumor | LUAD | RX | Stage IA | MX | N0 | T1b | Yes | Alive | MALE | WHITE | 49 | 526 |  |
| TCGA-95- 7039-01A-11R-  1949-07 | Tumor | LUAD | Not Available | Stage IIB | MX | N0 | T3 | Yes | Alive | FEMALE | WHITE | 54 | 1272 |  |
| TCGA-95- 7043-01A-11R-  1949-07 | Tumor | LUAD | Not Available | Stage IA | MX | N0 | T1a | Yes | Alive | FEMALE | WHITE | 63 | 503 |  |
| TCGA-95- 7562-01A-11R-  2241-07 | Tumor | LUAD | RX | Stage IIA | M0 | N1 | T2a | Yes | Dead | MALE | BLACK OR AFRICAN AMERICAN | 71 | 87 |  |
| TCGA-95- 7567-01A-11R-  2066-07 | Tumor | LUAD | Not Available | Stage IIB | M0 | N1 | T2b | Yes | Alive | MALE | WHITE | 61 | 568 |  |
| TCGA-95- 7944-01A-11R-  2187-07 | Tumor | LUAD | R0 | Stage IA | M0 | N0 | T1a | Yes | Alive | MALE | WHITE | 71 | 377 |  |
| TCGA-95- 7947-01A-11R-  2187-07 | Tumor | LUAD | R0 | Stage IA | M0 | N0 | T1a | Yes | Alive | MALE | WHITE | 67 | 477 |  |
| TCGA-95- 7948-01A-11R-  2187-07 | Tumor | LUAD | R0 | Stage IB | M0 | N0 | T2a | Yes | Alive | FEMALE | WHITE | 42 | 476 |  |
| TCGA-95- 8039-01A-11R-  2241-07 | Tumor | LUAD | RX | Stage IA | MX | N0 | T1 | No | Alive | MALE | WHITE | 72 | 830 |  |
| TCGA-95- 8494-01A-11R-  2326-07 | Tumor | LUAD | Not Evaluated | Stage IIA | M0 | N1 | T2a | Yes | Alive | MALE | WHITE | 67 | 84 |  |
| TCGA-95- A4VK-01A- 11R-A262-07 | Tumor | LUAD | RX | Stage IIIA | M0 | N2 | T2b | Yes | Alive | FEMALE | WHITE | 74 | 651 |  |
| TCGA-95- A4VN-01A- 11R-A262-07 | Tumor | LUAD | R0 | Stage IIA | M0 | N1 | T2a | Yes | Alive | FEMALE | WHITE | 62 | 553 |  |
| TCGA-95-  A4VP-01A- 21R-A262-07 | Tumor | LUAD | Not Evaluated | Stage IIIA | M0 | N2 | T2b | Yes | Alive | FEMALE | WHITE | 66 | 605 |  |
| TCGA-97- 7546-01A-11R-  2039-07 | Tumor | LUAD | R0 | Stage IA | MX | N0 | T1 | Yes | Alive | FEMALE | WHITE | 76 | 1285 |  |
| TCGA-97- 7547-01A-11R-  2039-07 | Tumor | LUAD | Not Available | Stage IB | MX | N0 | T2 | Yes | Alive | FEMALE | WHITE | 67 | 1965 |  |
| TCGA-97- 7552-01A-11R-  2039-07 | Tumor | LUAD | Not Available | Stage IB | MX | N0 | T2 | Yes | Alive | MALE | WHITE | 70 | 1932 |  |
| TCGA-97- 7553-01A-21R-  2039-07 | Tumor | LUAD | Not Available | Stage IA | MX | N0 | T1 | Yes | Alive | FEMALE | WHITE | 58 | 1870 |  |
| TCGA-97- 7554-01A-11R-  2039-07 | Tumor | LUAD | R0 | Stage IIIA | M0 | N2 | T2a | Yes | Alive | FEMALE | WHITE | 83 | 775 |  |
| TCGA-97- 7937-01A-11R-  2170-07 | Tumor | LUAD | Not Available | Stage IB | MX | N0 | T2a | Yes | Alive | MALE | WHITE | 65 | 564 |  |
| TCGA-97- 7938-01A-11R-  2170-07 | Tumor | LUAD | R0 | Stage IA | MX | N0 | T1a | Yes | Dead | FEMALE | WHITE | 76 | 18 |  |
| TCGA-97- 7941-01A-11R-  2187-07 | Tumor | LUAD | R0 | Stage IA | MX | N0 | T1b | Yes | Alive | FEMALE | WHITE | 72 | 484 |  |
| TCGA-97- 8171-01A-11R-  2287-07 | Tumor | LUAD | Not Available | Stage IV | M1a | N2 | T2a | Yes | Alive | MALE | ASIAN | 81 | 568 |  |
| TCGA-97- 8172-01A-11R-  2287-07 | Tumor | LUAD | Not Available | Stage IB | M0 | N0 | T2a | Yes | Alive | FEMALE | WHITE | 75 | 545 |  |
| TCGA-97- 8174-01A-11R-  2287-07 | Tumor | LUAD | Not Available | Stage IIA | M0 | N0 | T2b | Yes | Dead | MALE | WHITE | 67 | 164 |  |
| TCGA-97- 8175-01A-11R-  2287-07 | Tumor | LUAD | Not Available | Stage IB | M0 | N0 | T2a | Yes | Alive | FEMALE | WHITE | 55 | 551 |  |
| TCGA-97- 8176-01A-11R-  2403-07 | Tumor | LUAD | R0 | Stage IIIA | M0 | N1 | T3 | Yes | Alive | MALE | WHITE | 63 | 468 |  |
| TCGA-97- 8177-01A-11R-  2287-07 | Tumor | LUAD | Not Available | Stage IB | M0 | N0 | T2a | No | Alive | FEMALE | WHITE | 59 | 499 |  |
| TCGA-97- 8179-01A-11R-  2287-07 | Tumor | LUAD | Not Available | Stage IA | M0 | N0 | T1a | Yes | Alive | MALE | WHITE | 72 | 435 |  |
| TCGA-97- 8547-01A-11R-  2403-07 | Tumor | LUAD | Not Evaluated | Stage IIIA | MX | N2 | T2a | No | Alive | FEMALE | Not Evaluated | 78 | 657 |  |
| TCGA-97- 8552-01A-11R-  2403-07 | Tumor | LUAD | Not Evaluated | Stage I | MX | N0 | T1a | No | Alive | FEMALE | WHITE | 55 | 626 |  |
| TCGA-97- A4LX-01A-11R- A24X-07 | Tumor | LUAD | Not Evaluated | Stage IB | M0 | N0 | T2a | Yes | Alive | MALE | WHITE | 81 | 614 |  |
| TCGA-97- A4M0-01A- 11R-A24X-07 | Tumor | LUAD | Not Evaluated | Stage IB | M0 | N0 | T2a | Yes | Alive | FEMALE | WHITE | 60 | 652 |  |
| TCGA-97- A4M1-01A- 11R-A24X-07 | Tumor | LUAD | Not Evaluated | Stage IA | M0 | N0 | T1a | Yes | Alive | FEMALE | WHITE | 52 | 601 |  |
| TCGA-97-  A4M2-01A- 12R-A24X-07 | Tumor | LUAD | R0 | Stage IA | M0 | N0 | T1a | Yes | Alive | MALE | WHITE | 66 | 624 |  |
| TCGA-97- A4M3-01A- 11R-A24X-07 | Tumor | LUAD | Not Evaluated | Stage IA | M0 | N0 | T1b | Yes | Alive | FEMALE | WHITE | 69 | 540 |  |
| TCGA-97- A4M5-01A- 11R-A24X-07 | Tumor | LUAD | Not Evaluated | Stage IA | M0 | N0 | T1b | Yes | Alive | MALE | WHITE | 83 | 634 |  |
| TCGA-97- A4M6-01A- 11R-A24X-07 | Tumor | LUAD | Not Evaluated | Stage IA | M0 | N0 | T1a | No | Alive | FEMALE | WHITE | 45 | 568 |  |
| TCGA-97- A4M7-01A- 11R-A24X-07 | Tumor | LUAD | R0 | Stage IA | M0 | N0 | T1b | Yes | Alive | MALE | WHITE | 74 | 629 |  |
| TCGA-99- 7458-01A-11R-  2039-07 | Tumor | LUAD | R0 | Stage IIIA | M0 | N0 | T4 | Yes | Alive | FEMALE | WHITE | 74 | 747 |  |
| TCGA-99- 8025-01A-11R-  2241-07 | Tumor | LUAD | R0 | Stage IIIA | M0 | N2 | T3 | Yes | Alive | FEMALE | BLACK OR AFRICAN AMERICAN | 72 | 1060 |  |
| TCGA-99- 8028-01A-11R-  2241-07 | Tumor | LUAD | R0 | Stage IA | M0 | N0 | T1a | Yes | Alive | FEMALE | BLACK OR AFRICAN AMERICAN | 50 | 1118 |  |
| TCGA-99- 8032-01A-11R-  2241-07 | Tumor | LUAD | R0 | Stage IA | M0 | N0 | T1a | Yes | Alive | MALE | WHITE | 61 | 44 |  |
| TCGA-99- 8033-01A-11R-  2241-07 | Tumor | LUAD | R0 | Stage IV | M1 | NX | TX | No | Alive | FEMALE | WHITE | 74 | 656 |  |
| TCGA-99- AA5R-01A- 11R-A39D-07 | Tumor | LUAD | R0 | Stage IA | M0 | N0 | T1a | Yes | Alive | FEMALE | BLACK OR AFRICAN AMERICAN | 70 | 658 |  |
| TCGA-J2- 8192-01A-11R-  2241-07 | Tumor | LUAD | Not Available | Stage IIA | MX | N1 | T2a | No | Alive | FEMALE | WHITE | 65 | 739 |  |
| TCGA-J2- 8194-01A-11R-  2241-07 | Tumor | LUAD | Not Available | Stage IIB | MX | N0 | T3 | Yes | Alive | FEMALE | WHITE | 69 | 724 |  |
| TCGA-J2- A4AD-01A- 11R-A24H-07 | Tumor | LUAD | RX | Stage IA | MX | N0 | T1a | Yes | Alive | FEMALE | WHITE | 61 | 550 |  |
| TCGA-J2- A4AE-01A- 21R-A24H-07 | Tumor | LUAD | R0 | Stage IA | MX | N0 | T1a | No | Alive | FEMALE | WHITE | 77 | 1079 |  |
| TCGA-J2- A4AG-01A- 11R-A24H-07 | Tumor | LUAD | R0 | Stage IA | MX | N0 | T1b | Yes | Alive | FEMALE | WHITE | 66 | 988 |  |
| TCGA-L4- A4E5-01A-11R- A24X-07 | Tumor | LUAD | R0 | Stage I | M0 | N0 | T1 | Yes | Alive | FEMALE | WHITE | 48 | 578 |  |
| TCGA-L4- A4E6-01A-11R- A24H-07 | Tumor | LUAD | R0 | Stage IA | M0 | N0 | T1 | Yes | Alive | MALE | WHITE | 67 | 435 |  |
| TCGA-L9-  A443-01A-12R- A24H-07 | Tumor | LUAD | R0 | Stage IA | MX | N0 | T1a | Yes | Alive | FEMALE | WHITE | 63 | 193 |  |
| TCGA-L9- A444-01A-21R- A24H-07 | Tumor | LUAD | R0 | Stage IA | MX | N0 | T1a | Yes | Alive | FEMALE | WHITE | 60 | 307 |  |
| TCGA-L9- A50W-01A- 12R-A39D-07 | Tumor | LUAD | R0 | Stage IIA | MX | N1 | T1b | Yes | Alive | MALE | BLACK OR AFRICAN AMERICAN | 75 | 442 |  |
| TCGA-L9- A5IP-01A-21R- A39D-07 | Tumor | LUAD | R1 | Stage IV | M1b | N2 | T3 | Yes | Dead | FEMALE | BLACK OR AFRICAN AMERICAN | 40 | 58 |  |
| TCGA-L9- A743-01A-43R- A39D-07 | Tumor | LUAD | R0 | Stage IIA | M0 | N1 | T2a | Yes | Alive | MALE | BLACK OR AFRICAN AMERICAN | 56 | 664 |  |
| TCGA-L9- A7SV-01A- 11R-A39D-07 | Tumor | LUAD | R0 | Stage IIA | M0 | N1 | T2a | Yes | Alive | MALE | BLACK OR AFRICAN AMERICAN | 69 | 565 |  |
| TCGA-L9- A8F4-01A-11R- A39D-07 | Tumor | LUAD | R0 | Stage IB | MX | N0 | T2a | Yes | Alive | FEMALE | BLACK OR AFRICAN AMERICAN | 64 | 476 |  |
| TCGA-MN- A4N1-01A- 11R-A24X-07 | Tumor | LUAD | R0 | Stage IIA | M0 | N1 | T2a | Yes | Alive | MALE | BLACK OR AFRICAN AMERICAN | 60 | 827 |  |
| TCGA-MN-  A4N4-01A- 12R-A24X-07 | Tumor | LUAD | R0 | Stage IA | M0 | N0 | T1b | Yes | Alive | MALE | WHITE | 57 | 1175 |  |
| TCGA-MN- A4N5-01A- 11R-A24X-07 | Tumor | LUAD | R0 | Stage IA | M0 | N0 | T1a | Yes | Alive | MALE | WHITE | 63 | 84 |  |
| TCGA-MP- A4SV-01A- 11R-A24X-07 | Tumor | LUAD | R0 | Stage IB | M0 | N0 | T2 | Yes | Dead | MALE | Unknown | 67 | 2620 |  |
| TCGA-MP- A4SW-01A- 21R-A24X-07 | Tumor | LUAD | R0 | Stage IIB | M0 | N1 | T2 | Yes | Dead | MALE | WHITE | 53 | 1778 |  |
| TCGA-MP- A4SY-01A- 21R-A24X-07 | Tumor | LUAD | R0 | Stage IIB | M0 | N1 | T2 | Yes | Dead | MALE | WHITE | 61 | 1501 |  |
| TCGA-MP- A4T4-01A-11R- A262-07 | Tumor | LUAD | R0 | Stage IIB | M0 | N1 | T2 | Yes | Dead | FEMALE | WHITE | 68 | 2617 |  |
| TCGA-MP- A4T6-01A-32R- A262-07 | Tumor | LUAD | R0 | Stage IIIA | MX | N2 | T1 | Yes | Dead | FEMALE | WHITE | 76 | 1790 |  |
| TCGA-MP- A4T7-01A-11R- A24X-07 | Tumor | LUAD | R0 | Stage IV | M1 | N0 | T2 | Yes | Dead | FEMALE | Unknown | 75 | 167 |  |
| TCGA-MP- A4T8-01A-11R- A24X-07 | Tumor | LUAD | R0 | Stage IIIA | M0 | N2 | T2 | Yes | Dead | MALE | Unknown | 68 | 161 |  |
| TCGA-MP- A4T9-01A-11R- A24X-07 | Tumor | LUAD | RX | Stage IIIA | MX | N2 | T2 | Yes | Dead | FEMALE | WHITE | 54 | 1265 |  |
| TCGA-MP- A4TA-01A- 21R-A24X-07 | Tumor | LUAD | R0 | Stage IA | M0 | N0 | T1 | Yes | Dead | FEMALE | WHITE | 75 | 950 |  |
| TCGA-MP- A4TC-01A- 11R-A24X-07 | Tumor | LUAD | R0 | Stage IIIA | M0 | N2 | T1 | Yes | Dead | MALE | WHITE | 77 | 74 |  |
| TCGA-MP- A4TD-01A- 32R-A262-07 | Tumor | LUAD | RX | Stage IIIA | M0 | N2 | T2 | Yes | Dead | MALE | WHITE | 71 | 307 |  |
| TCGA-MP- A4TE-01A- 22R-A466-07 | Tumor | LUAD | RX | Stage IIA | MX | N0 | T2b | Yes | Dead | MALE | WHITE | 56 | 896 |  |
| TCGA-MP- A4TF-01A-11R- A262-07 | Tumor | LUAD | R0 | Stage IIA | M0 | N0 | T2b | Yes | Dead | FEMALE | WHITE | 58 | 336 |  |
| TCGA-MP- A4TH-01A- 31R-A262-07 | Tumor | LUAD | R0 | Stage IA | M0 | N0 | T1a | Yes | Alive | FEMALE | WHITE | 70 | 741 |  |
| TCGA-MP- A4TI-01A-21R- A24X-07 | Tumor | LUAD | R0 | Stage IIA | M0 | N1 | T2a | Yes | Dead | MALE | WHITE | 72 | 429 |  |
| TCGA-MP- A4TJ-01A-51R- A262-07 | Tumor | LUAD | R0 | Stage IA | M0 | N0 | T1 | Yes | Dead | FEMALE | Unknown | 62 | 339 |  |
| TCGA-MP- A4TK-01A- 11R-A24X-07 | Tumor | LUAD | R0 | Stage IIB | MX | N1 | T2 | Yes | Dead | FEMALE | Unknown | 56 | 582 |  |
| TCGA-MP- A5C7-01A- 11R-A262-07 | Tumor | LUAD | R0 | Stage IB | M0 | N0 | T2 | Yes | Alive | FEMALE | WHITE | 76 | 2248 |  |
| TCGA-NJ- A4YF-01A- 12R-A262-07 | Tumor | LUAD | Not Evaluated | Stage IA | M0 | N0 | T1 | Yes | Alive | FEMALE | BLACK OR AFRICAN AMERICAN | 50 | 2161 |  |
| TCGA-NJ- A4YG-01A- 22R-A262-07 | Tumor | LUAD | Not Evaluated | Stage IB | M0 | N0 | T2 | Yes | Alive | MALE | WHITE | 65 | 2261 |  |
| TCGA-NJ- A4YI-01A-11R- A262-07 | Tumor | LUAD | Not Evaluated | Stage IIIA | M0 | N2 | T2 | Yes | Dead | FEMALE | WHITE | 87 | 4 |  |
| TCGA-NJ- A4YP-01A- 11R-A262-07 | Tumor | LUAD | Not Evaluated | Stage IB | M0 | N0 | T2a | Yes | Alive | MALE | WHITE | 52 | 50 |  |
| TCGA-NJ- A4YQ-01A- 11R-A262-07 | Tumor | LUAD | RX | Stage IA | M0 | N0 | T1b | Yes | Alive | FEMALE | WHITE | 69 | 1432 |  |
| TCGA-NJ-  A55A-01A-11R- A262-07 | Tumor | LUAD | Not Available | Stage IB | M0 | N0 | T2 | Yes | Alive | FEMALE | WHITE | 76 | 15 |  |
| TCGA-NJ- A55O-01A- 11R-A262-07 | Tumor | LUAD | Not Available | Stage IIA | M0 | N1 | T1b | Yes | Alive | FEMALE | WHITE | 56 | 13 |  |
| TCGA-NJ- A55R-01A- 11R-A262-07 | Tumor | LUAD | Not Available | Stage IA | MX | N0 | T1b | Yes | Alive | MALE | WHITE | 67 | 603 |  |
| TCGA-NJ- A7XG-01A- 12R-A39D-07 | Tumor | LUAD | Not Available | Stage IIIA | M0 | N1 | T4 | Yes | Alive | MALE | BLACK OR AFRICAN AMERICAN | 49 | 617 |  |
| TCGA-O1- A52J-01A-11R- A262-07 | Tumor | LUAD | Not Evaluated | Stage IA | MX | N0 | T1 | Yes | Dead | FEMALE | WHITE | 74 | 1798 |  |
| TCGA-S2- AA1A-01A- 12R-A39D-07 | Tumor | LUAD | R0 | Stage IA | M0 | N0 | T1b | Yes | Alive | FEMALE | BLACK OR AFRICAN AMERICAN | 68 | 513 |  |
| TCGA-18- 3406-01A-01R-  0980-07 | Tumor | LUSC | R0 | Stage IA | M0 | N0 | T1 | Yes | Dead | MALE | WHITE | 67 | 371 |  |
| TCGA-18- 3407-01A-01R-  0980-07 | Tumor | LUSC | R0 | Stage IB | M0 | N0 | T2 | Yes | Dead | MALE | ASIAN | 72 | 136 |  |
| TCGA-18- 3408-01A-01R-  0980-07 | Tumor | LUSC | R0 | Stage IB | M0 | N0 | T2 | Yes | Alive | FEMALE | WHITE | 77 | 2304 |  |
| TCGA-18- 3409-01A-01R-  0980-07 | Tumor | LUSC | R0 | Stage IA | M0 | N0 | T1 | Yes | Alive | MALE | WHITE | 74 | 3747 |  |
| TCGA-18- 3410-01A-01R-  0980-07 | Tumor | LUSC | R0 | Stage IIB | M0 | N0 | T3 | Yes | Dead | MALE | Not Available | 81 | 146 |  |
| TCGA-18- 3411-01A-01R-  0980-07 | Tumor | LUSC | R0 | Stage IIIA | M0 | N2 | T2 | Yes | Alive | FEMALE | Not Available | 63 | 3576 |  |
| TCGA-18- 3412-01A-01R-  0980-07 | Tumor | LUSC | R0 | Stage IB | M0 | N0 | T2 | Yes | Dead | MALE | WHITE | 52 | 345 |  |
| TCGA-18- 3414-01A-01R-  0980-07 | Tumor | LUSC | R0 | Stage IV | M1 | N1 | T4 | Yes | Dead | MALE | ASIAN | 73 | 716 |  |
| TCGA-18- 3415-01A-01R-  0980-07 | Tumor | LUSC | R0 | Stage IB | M0 | N0 | T2 | Yes | Alive | MALE | Not Available | 77 | 2803 |  |
| TCGA-18- 3416-01A-01R-  0980-07 | Tumor | LUSC | R0 | Stage IIB | M0 | N1 | T2 | Yes | Alive | MALE | Not Available | 83 | 973 |  |
| TCGA-18- 3417-01A-01R-  1443-07 | Tumor | LUSC | R0 | Stage IV | M1 | N1 | T2 | Yes | Alive | MALE | Not Available | 65 | 1097 |  |
| TCGA-18- 3419-01A-01R-  0980-07 | Tumor | LUSC | R0 | Stage IIB | M0 | N1 | T2 | Yes | Alive | MALE | Not Available | 73 | 2811 |  |
| TCGA-18- 3421-01A-01R-  0980-07 | Tumor | LUSC | R0 | Stage IB | M0 | N0 | T2 | Yes | Alive | MALE | WHITE | 65 | 2645 |  |
| TCGA-18- 4083-01A-01R-  1100-07 | Tumor | LUSC | R0 | Stage IIB | M0 | N1 | T2 | Yes | Dead | MALE | WHITE | 63 | 188 |  |
| TCGA-18- 4086-01A-01R-  1100-07 | Tumor | LUSC | R0 | Stage IB | M0 | N0 | T2 | Yes | Dead | MALE | Not Available | 64 | 85 |  |
| TCGA-18- 4721-01A-01R-  1443-07 | Tumor | LUSC | R0 | Stage IA | M0 | N0 | T1 | Yes | Alive | MALE | WHITE | 74 | 4694 |  |
| TCGA-18- 5592-01A-01R-  1635-07 | Tumor | LUSC | R0 | Stage IIB | M0 | N0 | T3 | Yes | Alive | MALE | Not Available | 57 | 1519 |  |
| TCGA-18- 5595-01A-01R-  1635-07 | Tumor | LUSC | R0 | Stage IB | M0 | N0 | T2 | No | Dead | MALE | Not Available | 50 | 827 |  |
| TCGA-21- 1070-01A-01R-  0692-07 | Tumor | LUSC | R0 | Stage IIIA | M0 | N0 | T3 | Yes | Alive | FEMALE | BLACK OR AFRICAN AMERICAN | 60 | 3636 |  |
| TCGA-21- 1071-01A-01R-  0692-07 | Tumor | LUSC | R0 | Stage IB | M0 | N0 | T2 | Yes | Dead | MALE | WHITE | 67 | 1426 |  |
| TCGA-21- 1072-01A-01R-  0692-07 | Tumor | LUSC | R0 | Stage IB | M0 | N0 | T2 | Yes | Alive | MALE | WHITE | 75 | 3016 |  |
| TCGA-21- 1075-01A-01R-  0692-07 | Tumor | LUSC | R0 | Stage IIB | M0 | N1 | T2 | Yes | Alive | MALE | WHITE | 57 | 2134 |  |
| TCGA-21- 1076-01A-01R-  0692-07 | Tumor | LUSC | R0 | Stage IB | M0 | N0 | T2 | Yes | Alive | FEMALE | WHITE | 54 | 1852 |  |
| TCGA-21- 1076-01A-02R-  0692-07 | Tumor | LUSC | R0 | Stage IB | M0 | N0 | T2 | Yes | Alive | FEMALE | WHITE | 54 | 1852 |  |
| TCGA-21- 1077-01A-01R-  0692-07 | Tumor | LUSC | R0 | Stage IIB | M0 | N1 | T2 | Yes | Dead | MALE | WHITE | 64 | 1058 |  |
| TCGA-21- 1078-01A-01R-  0692-07 | Tumor | LUSC | R0 | Stage IB | M0 | N0 | T2 | Yes | Dead | MALE | WHITE | 77 | 474 |  |
| TCGA-21- 1079-01A-01R-  0692-07 | Tumor | LUSC | R0 | Stage IIIA | M0 | N0 | T3 | Yes | Dead | MALE | WHITE | 71 | 965 |  |
| TCGA-21- 1080-01A-01R-  0692-07 | Tumor | LUSC | R0 | Stage IB | M0 | N0 | T2 | Yes | Alive | MALE | WHITE | 66 | 3724 |  |
| TCGA-21- 1081-01A-01R-  0692-07 | Tumor | LUSC | R0 | Stage IIB | M0 | N1 | T2 | Yes | Dead | MALE | WHITE | 69 | 284 |  |
| TCGA-21- 1082-01A-01R-  0692-07 | Tumor | LUSC | R0 | Stage IB | M0 | N0 | T2 | Not Available | Alive | MALE | WHITE | 61 | 3644 |  |
| TCGA-21- 1083-01A-01R-  0692-07 | Tumor | LUSC | R0 | Stage IA | M0 | N0 | T1 | Yes | Dead | MALE | WHITE | 75 | 1315 |  |
| TCGA-21- 5782-01A-01R-  1635-07 | Tumor | LUSC | R0 | Stage IB | M0 | N0 | T2 | Yes | Dead | FEMALE | WHITE | 68 | 962 |  |
| TCGA-21- 5783-01A-41R-  2187-07 | Tumor | LUSC | R0 | Stage IB | M0 | N0 | T2 | Yes | Dead | MALE | WHITE | 76 | 2680 |  |
| TCGA-21- 5784-01A-01R-  1635-07 | Tumor | LUSC | R0 | Stage IB | M0 | N0 | T2 | Yes | Alive | FEMALE | WHITE | 80 | 1268 |  |
| TCGA-21- 5786-01A-01R-  1635-07 | Tumor | LUSC | R0 | Stage IB | M0 | N0 | T2 | Yes | Alive | MALE | WHITE | 64 | 1032 |  |
| TCGA-21- 5787-01A-01R-  1635-07 | Tumor | LUSC | R0 | Stage IIIA | M0 | N2 | T2 | Yes | Dead | MALE | BLACK OR AFRICAN AMERICAN | 65 | 329 |  |
| TCGA-21- A5DI-01A-31R- A26W-07 | Tumor | LUSC | R0 | Stage IA | M0 | N0 | T1b | Yes | Alive | MALE | WHITE | 77 | 979 |  |
| TCGA-22- 0940-01A-01R-  0692-07 | Tumor | LUSC | R0 | Stage IIA | M0 | N1 | T1 | Yes | Dead | MALE | WHITE | 71 | 669 |  |
| TCGA-22- 0944-01A-01R-  0692-07 | Tumor | LUSC | R0 | Stage IB | M0 | N0 | T2 | Yes | Dead | MALE | WHITE | 61 | 223 |  |
| TCGA-22-  1000-01A-01R- A32Z-07 | Tumor | LUSC | R0 | Stage IB | M0 | N0 | T2 | Yes | Dead | MALE | WHITE | 76 | 454 |  |
| TCGA-22- 1002-01A-01R-  0692-07 | Tumor | LUSC | R0 | Stage IA | M0 | N0 | T1 | Yes | Dead | MALE | WHITE | 69 | 131 |  |
| TCGA-22- 1005-01A-01R-  0692-07 | Tumor | LUSC | R0 | Stage IA | M0 | N0 | T1 | Yes | Dead | MALE | WHITE | 63 | 1953 |  |
| TCGA-22- 1011-01A-01R-  0692-07 | Tumor | LUSC | R0 | Stage IB | M0 | N0 | T2 | Yes | Dead | MALE | WHITE | 73 | 53 |  |
| TCGA-22- 1012-01A-01R-  0692-07 | Tumor | LUSC | R0 | Stage IB | M0 | N0 | T2 | Yes | Dead | FEMALE | WHITE | 80 | 429 |  |
| TCGA-22- 1016-01A-01R-  0692-07 | Tumor | LUSC | R0 | Stage IB | M0 | N0 | T2 | Yes | Dead | MALE | WHITE | 65 | 822 |  |
| TCGA-22- 1017-01A-01R-  0692-07 | Tumor | LUSC | R0 | Stage IA | M0 | N0 | T1 | Yes | Dead | MALE | WHITE | 62 | 1485 |  |
| TCGA-22- 4591-01A-01R-  1201-07 | Tumor | LUSC | R0 | Stage IIIA | M0 | N2 | T3 | Yes | Dead | MALE | WHITE | 80 | 623 |  |
| TCGA-22- 4593-01A-21R-  1820-07 | Tumor | LUSC | R0 | Stage IIA | M0 | N0 | T2b | Yes | Dead | MALE | WHITE | 77 | 1067 |  |
| TCGA-22- 4593-11A-01R-  1820-07 | Normal | LUSC | R0 | Stage IIA | M0 | N0 | T2b | Yes | Dead | MALE | WHITE | 77 | 1067 |  |
| TCGA-22- 4594-01A-01R-  1201-07 | Tumor | LUSC | R0 | Stage IIIA | M0 | N2 | T3 | Yes | Dead | FEMALE | Not Available | 60 | 1470 |  |
| TCGA-22- 4595-01A-01R-  1201-07 | Tumor | LUSC | R0 | Stage IIIA | Not Available | N2 | T3 | Yes | Dead | MALE | WHITE | 57 | 734 |  |
| TCGA-22- 4596-01A-01R-  1201-07 | Tumor | LUSC | R0 | Stage IB | M0 | N0 | T1b | Yes | Dead | FEMALE | WHITE | 69 | 17 |  |
| TCGA-22- 4599-01A-01R-  1443-07 | Tumor | LUSC | R0 | Stage IB | M0 | N0 | T2a | Yes | Dead | FEMALE | WHITE | 73 | 1161 |  |
| TCGA-22- 4601-01A-01R-  1443-07 | Tumor | LUSC | R0 | Stage IIIA | M0 | N0 | T4 | Yes | Dead | FEMALE | WHITE | 73 | 1057 |  |
| TCGA-22- 4604-01A-01R-  1201-07 | Tumor | LUSC | R0 | Stage IIA | M0 | N1 | T2a | Yes | Dead | MALE | WHITE | 73 | 399 |  |
| TCGA-22- 4605-01A-21R-  2125-07 | Tumor | LUSC | R0 | Stage IB | M0 | N0 | T2 | Yes | Dead | FEMALE | Not Available | 78 | 974 |  |
| TCGA-22- 4607-01A-01R-  1201-07 | Tumor | LUSC | R0 | Stage IB | M0 | N0 | T2a | Yes | Dead | MALE | WHITE | 75 | 587 |  |
| TCGA-22- 4609-01A-21R-  2125-07 | Tumor | LUSC | R0 | Stage IA | M0 | N0 | T1 | Yes | Dead | MALE | WHITE | 81 | 291 |  |
| TCGA-22- 4609-11A-01R-  2125-07 | Normal | LUSC | R0 | Stage IA | M0 | N0 | T1 | Yes | Dead | MALE | WHITE | 81 | 291 |  |
| TCGA-22- 4613-01A-01R-  1443-07 | Tumor | LUSC | R0 | Stage IA | M0 | N0 | T1b | Yes | Dead | FEMALE | WHITE | 73 | 358 |  |
| TCGA-22- 5471-01A-01R-  1635-07 | Tumor | LUSC | R2 | Stage IB | M0 | N0 | T2 | Yes | Alive | MALE | WHITE | 75 | 1845 |  |
| TCGA-22- 5471-11A-01R-  1635-07 | Normal | LUSC | R2 | Stage IB | M0 | N0 | T2 | Yes | Alive | MALE | WHITE | 75 | 1845 |  |
| TCGA-22- 5472-01A-01R-  1635-07 | Tumor | LUSC | R0 | Stage IB | M0 | N0 | T2a | Yes | Dead | MALE | WHITE | 67 | 1975 |  |
| TCGA-22- 5472-11A-11R-  1635-07 | Normal | LUSC | R0 | Stage IB | M0 | N0 | T2a | Yes | Dead | MALE | WHITE | 67 | 1975 |  |
| TCGA-22- 5473-01A-01R-  1635-07 | Tumor | LUSC | R0 | Discrepancy | M0 | N0 | T3 | Yes | Dead | MALE | WHITE | 78 | 1933 |  |
| TCGA-22- 5474-01A-01R-  1635-07 | Tumor | LUSC | R0 | Stage IB | M0 | N0 | T2a | Yes | Dead | MALE | WHITE | 74 | 445 |  |
| TCGA-22- 5477-01A-01R-  1635-07 | Tumor | LUSC | R0 | Stage IA | M0 | N0 | T1 | Yes | Dead | MALE | WHITE | 65 | 1346 |  |
| TCGA-22- 5478-01A-01R-  1635-07 | Tumor | LUSC | R0 | Stage IB | M0 | N0 | T2a | Yes | Dead | MALE | Not Available | 79 | 24 |  |
| TCGA-22- 5478-11A-11R-  1635-07 | Normal | LUSC | R0 | Stage IB | M0 | N0 | T2a | Yes | Dead | MALE | Not Available | 79 | 24 |  |
| TCGA-22- 5479-01A-31R-  1949-07 | Tumor | LUSC | R0 | Stage IB | M0 | N0 | T2 | Yes | Alive | MALE | WHITE | 64 | 2625 |  |
| TCGA-22- 5480-01A-01R-  1635-07 | Tumor | LUSC | R0 | Stage IA | M0 | N0 | T1b | Yes | Dead | FEMALE | WHITE | 66 | 2170 |  |
| TCGA-22- 5481-01A-31R-  1949-07 | Tumor | LUSC | R0 | Stage IIB | M0 | N1 | T2 | Yes | Dead | FEMALE | WHITE | 72 | 2409 |  |
| TCGA-22- 5481-11A-01R-  1949-07 | Normal | LUSC | R0 | Stage IIB | M0 | N1 | T2 | Yes | Dead | FEMALE | WHITE | 72 | 2409 |  |
| TCGA-22- 5482-01A-01R-  1635-07 | Tumor | LUSC | R0 | Stage IB | M0 | N0 | T2a | Yes | Dead | MALE | WHITE | 81 | 357 |  |
| TCGA-22- 5482-11A-01R-  1635-07 | Normal | LUSC | R0 | Stage IB | M0 | N0 | T2a | Yes | Dead | MALE | WHITE | 81 | 357 |  |
| TCGA-22- 5483-01A-01R-  1820-07 | Tumor | LUSC | R0 | Stage IIA | M0 | N1 | T1a | Yes | Dead | MALE | WHITE | 74 | 573 |  |
| TCGA-22- 5483-11A-11R-  1820-07 | Normal | LUSC | R0 | Stage IIA | M0 | N1 | T1a | Yes | Dead | MALE | WHITE | 74 | 573 |  |
| TCGA-22- 5485-01A-01R-  1635-07 | Tumor | LUSC | R0 | Stage IA | M0 | N0 | T1a | Yes | Dead | FEMALE | WHITE | 58 | 916 |  |
| TCGA-22- 5489-01A-01R-  1635-07 | Tumor | LUSC | R0 | Stage IA | M0 | N0 | T1b | Yes | Dead | MALE | WHITE | 64 | 1912 |  |
| TCGA-22- 5489-11A-01R-  1635-07 | Normal | LUSC | R0 | Stage IA | M0 | N0 | T1b | Yes | Dead | MALE | WHITE | 64 | 1912 |  |
| TCGA-22- 5491-01A-01R-  1635-07 | Tumor | LUSC | R0 | Stage IA | M0 | N0 | T1a | Yes | Dead | MALE | WHITE | 74 | 1713 |  |
| TCGA-22- 5491-11A-01R-  1858-07 | Normal | LUSC | R0 | Stage IA | M0 | N0 | T1a | Yes | Dead | MALE | WHITE | 74 | 1713 |  |
| TCGA-22- 5492-01A-01R-  1635-07 | Tumor | LUSC | R0 | Stage IIIA | M0 | N2 | T2a | Yes | Dead | FEMALE | Not Available | 73 | 506 |  |
| TCGA-22- A5C4-01A- 12R-A27Q-07 | Tumor | LUSC | R0 | Stage IIA | M0 | N0 | T2b | Yes | Alive | MALE | WHITE | 70 | 671 |  |
| TCGA-33- 4532-01A-01R-  1201-07 | Tumor | LUSC | R0 | Stage IB | M0 | N0 | T2 | Yes | Alive | MALE | WHITE | 68 | 3924 |  |
| TCGA-33- 4533-01A-01R-  1201-07 | Tumor | LUSC | R0 | Stage IB | M0 | N0 | T2 | Yes | Alive | FEMALE | BLACK OR AFRICAN AMERICAN | 76 | 4068 |  |
| TCGA-33- 4538-01A-01R-  1201-07 | Tumor | LUSC | RX | Stage IIIA | M0 | N2 | T2 | Yes | Dead | MALE | WHITE | 66 | 2979 |  |
| TCGA-33- 4547-01A-01R-  1201-07 | Tumor | LUSC | R0 | Stage IB | M0 | N0 | T2 | Yes | Alive | MALE | WHITE | 68 | 2419 |  |
| TCGA-33- 4566-01A-01R-  1443-07 | Tumor | LUSC | R0 | Stage IB | M0 | N0 | T2 | Yes | Dead | MALE | WHITE | 40 | 5287 |  |
| TCGA-33- 4582-01A-01R-  1443-07 | Tumor | LUSC | R0 | Stage IA | M0 | N0 | T1 | Yes | Dead | MALE | WHITE | 55 | 3149 |  |
| TCGA-33- 4583-01A-01R-  1443-07 | Tumor | LUSC | R0 | Stage IA | M0 | N0 | T1 | Yes | Alive | MALE | WHITE | 73 | 4601 |  |
| TCGA-33- 4586-01A-01R-  1443-07 | Tumor | LUSC | Not Available | Stage IIIA | M0 | N2 | T2 | Yes | Dead | MALE | WHITE | 57 | 428 |  |
| TCGA-33- 4587-01A-11R-  2125-07 | Tumor | LUSC | R0 | Stage IB | MX | N0 | T2 | Yes | Dead | FEMALE | WHITE | 63 | 1656 |  |
| TCGA-33- 4587-11A-01R-  2125-07 | Normal | LUSC | R0 | Stage IB | MX | N0 | T2 | Yes | Dead | FEMALE | WHITE | 63 | 1656 |  |
| TCGA-33- 4589-01A-01R-  1443-07 | Tumor | LUSC | Not Available | Stage IIB | M0 | N1 | T2 | Yes | Dead | FEMALE | WHITE | 62 | 47 |  |
| TCGA-33- 6737-01A-11R-  1820-07 | Tumor | LUSC | Not Available | Stage IIIA | M0 | N2 | T2 | Yes | Dead | MALE | WHITE | 71 | 601 |  |
| TCGA-33- 6737-11A-01R-  1820-07 | Normal | LUSC | Not Available | Stage IIIA | M0 | N2 | T2 | Yes | Dead | MALE | WHITE | 71 | 601 |  |
| TCGA-33- 6738-01A-11R-  1949-07 | Tumor | LUSC | Not Available | Stage IIIA | MX | N2 | T1 | Yes | Alive | MALE | WHITE | 80 | 1927 |  |
| TCGA-33- A4WN-01A- 11R-A262-07 | Tumor | LUSC | R0 | Stage IB | MX | N0 | T2a | Yes | Dead | MALE | WHITE | 60 | 143 |  |
| TCGA-33- A5GW-01A- 11R-A27Q-07 | Tumor | LUSC | R0 | Stage IIA | MX | N1 | T1a | Yes | Alive | MALE | WHITE | 67 | 9 |  |
| TCGA-33- AAS8-01A- 11R-A405-07 | Tumor | LUSC | R0 | Stage IA | MX | N0 | T1 | Yes | Dead | FEMALE | BLACK OR AFRICAN AMERICAN | 59 | 1114 |  |
| TCGA-33- AASB-01A- 11R-A405-07 | Tumor | LUSC | R0 | Stage IB | MX | N0 | T2 | Yes | Dead | MALE | BLACK OR AFRICAN AMERICAN | 66 | 211 |  |
| TCGA-33- AASD-01A- 11R-A405-07 | Tumor | LUSC | R0 | Stage IA | MX | N0 | T1 | Yes | Dead | MALE | BLACK OR AFRICAN AMERICAN | 83 | 3376 |  |
| TCGA-33- AASI-01A-22R- A405-07 | Tumor | LUSC | RX | Stage IIB | MX | N1 | T2 | Yes | Dead | FEMALE | BLACK OR AFRICAN AMERICAN | 65 | 1344 |  |
| TCGA-33- AASJ-01A- 11R-A405-07 | Tumor | LUSC | R0 | Stage IB | MX | N0 | T2 | Yes | Dead | MALE | BLACK OR AFRICAN AMERICAN | 60 | 3600 |  |
| TCGA-33- AASL-01A- 11R-A405-07 | Tumor | LUSC | R0 | Stage IA | MX | N0 | T1 | Yes | Dead | FEMALE | BLACK OR AFRICAN AMERICAN | 57 | 826 |  |
| TCGA-34- 2596-01A-01R-  0851-07 | Tumor | LUSC | R0 | Stage IIB | M0 | N1 | T2 | Yes | Dead | MALE | WHITE | 70 | 80 |  |
| TCGA-34- 2600-01A-01R-  0851-07 | Tumor | LUSC | R0 | Stage IA | M0 | N0 | T1 | Yes | Dead | FEMALE | WHITE | 76 | 1874 |  |
| TCGA-34- 2608-01A-02R-  0851-07 | Tumor | LUSC | R0 | Stage IB | M0 | N0 | T2 | Yes | Dead | MALE | WHITE | 84 | 1000 |  |
| TCGA-34- 5231-01A-21R-  1820-07 | Tumor | LUSC | Not Available | Stage IA | M0 | N0 | T1 | Yes | Alive | MALE | WHITE | 72 | 1984 |  |
| TCGA-34- 5232-01A-21R-  1820-07 | Tumor | LUSC | Not Available | Stage IIA | M0 | N1 | T1 | Not Available | Alive | FEMALE | BLACK OR AFRICAN AMERICAN | 75 | 2471 |  |
| TCGA-34- 5234-01A-01R-  1635-07 | Tumor | LUSC | R0 | Stage IA | M0 | N0 | T1 | Yes | Alive | FEMALE | WHITE | 71 | 2271 |  |
| TCGA-34- 5236-01A-21R-  1820-07 | Tumor | LUSC | Not Available | Stage IIB | M0 | N0 | T3 | Not Available | Dead | MALE | WHITE | 60 | 276 |  |
| TCGA-34- 5239-01A-21R-  1820-07 | Tumor | LUSC | Not Available | Stage IIIA | M0 | N0 | T4 | Not Available | Alive | MALE | WHITE | 75 | 1834 |  |
| TCGA-34- 5240-01A-01R-  1443-07 | Tumor | LUSC | Not Available | Stage IIB | M0 | N1 | T2 | Yes | Alive | FEMALE | WHITE | 73 | 1541 |  |
| TCGA-34- 5241-01A-01R-  1443-07 | Tumor | LUSC | Not Available | Stage IB | M0 | N0 | T2 | Yes | Alive | MALE | WHITE | 79 | 515 |  |
| TCGA-34- 5927-01A-11R-  1820-07 | Tumor | LUSC | Not Available | Stage IA | M0 | N0 | T1 | Not Available | Alive | FEMALE | WHITE | 70 | 1361 |  |
| TCGA-34- 5928-01A-11R-  1820-07 | Tumor | LUSC | Not Available | Stage IIB | M0 | N1 | T2 | Yes | Alive | FEMALE | WHITE | 83 | 1196 |  |
| TCGA-34- 5929-01A-11R-  1820-07 | Tumor | LUSC | Not Available | Stage IB | M0 | N0 | T2 | Yes | Dead | FEMALE | WHITE | 78 | 151 |  |
| TCGA-34- 7107-01A-11R-  1949-07 | Tumor | LUSC | Not Available | Stage II | M0 | N0 | T2a | Yes | Dead | MALE | WHITE | 70 | 34 |  |
| TCGA-34- 7107-11A-01R-  1949-07 | Normal | LUSC | Not Available | Stage II | M0 | N0 | T2a | Yes | Dead | MALE | WHITE | 70 | 34 |  |
| TCGA-34- 8454-01A-11R-  2326-07 | Tumor | LUSC | R0 | Stage IIIA | M0 | N1 | T3 | Yes | Alive | FEMALE | WHITE | 62 | 1180 |  |
| TCGA-34- 8454-11A-01R-  2326-07 | Normal | LUSC | R0 | Stage IIIA | M0 | N1 | T3 | Yes | Alive | FEMALE | WHITE | 62 | 1180 |  |
| TCGA-34- 8455-01A-11R-  2326-07 | Tumor | LUSC | R0 | Stage IV | M1a | N0 | T4 | Yes | Dead | MALE | WHITE | 67 | 123 |  |
| TCGA-34- 8456-01A-21R-  2326-07 | Tumor | LUSC | R0 | Stage IIA | M0 | N1 | T2a | Yes | Alive | FEMALE | WHITE | 71 | 804 |  |
| TCGA-34- A5IX-01A-12R- A27Q-07 | Tumor | LUSC | Not Available | Stage IIB | M0 | N0 | T3 | Yes | Alive | MALE | WHITE | 80 | 1031 |  |
| TCGA-37- 3783-01A-01R-  1201-07 | Tumor | LUSC | R0 | Stage IIIA | M0 | N2 | T3 | Not Available | Alive | MALE | WHITE | 51 | 122 |  |
| TCGA-37- 3789-01A-01R-  0980-07 | Tumor | LUSC | R0 | Stage IB | Not Available | N0 | T2 | No | Alive | MALE | WHITE | 65 | 13 |  |
| TCGA-37- 3792-01A-01R-  0980-07 | Tumor | LUSC | R0 | Stage IB | M0 | N0 | T2 | No | Alive | MALE | WHITE | 69 | 12 |  |
| TCGA-37- 4129-01A-01R-  1100-07 | Tumor | LUSC | R0 | Stage IA | M0 | N0 | T1b | Yes | Alive | FEMALE | WHITE | 52 | 242 |  |
| TCGA-37- 4130-01A-01R-  1100-07 | Tumor | LUSC | R0 | Stage IA | M0 | N0 | T1b | Yes | Alive | MALE | WHITE | 56 | 247 |  |
| TCGA-37- 4132-01A-01R-  1100-07 | Tumor | LUSC | R0 | Stage IV | M1 | N0 | T2 | No | Alive | FEMALE | WHITE | 61 | 227 |  |
| TCGA-37- 4133-01A-01R-  1100-07 | Tumor | LUSC | R0 | Stage IIIA | M0 | N0 | T4 | Yes | Alive | MALE | WHITE | 63 | 238 |  |
| TCGA-37- 4135-01A-01R-  1100-07 | Tumor | LUSC | R0 | Stage IB | M0 | N0 | T2a | Yes | Alive | MALE | WHITE | 68 | 207 |  |
| TCGA-37- 4141-01A-02R-  1100-07 | Tumor | LUSC | R0 | Stage IA | M0 | N0 | T1b | No | Alive | FEMALE | WHITE | 65 | 12 |  |
| TCGA-37- 5819-01A-01R-  1635-07 | Tumor | LUSC | R0 | Stage IIIA | M0 | N2 | T2 | Yes | Alive | MALE | WHITE | 64 | 103 |  |
| TCGA-37- A5EL-01A-11R- A26W-07 | Tumor | LUSC | Not Evaluated | Stage IIB | M0 | N0 | T3 | Unknown | Alive | MALE | WHITE | 53 | 1143 |  |
| TCGA-37- A5EM-01A- 21R-A27Q-07 | Tumor | LUSC | Not Evaluated | Stage II | M0 | N0 | T2 | Unknown | Alive | MALE | WHITE | 49 | 867 |  |
| TCGA-37- A5EN-01A- 21R-A26W-07 | Tumor | LUSC | Not Available | Stage IIIB | M0 | N2 | T4 | Unknown | Alive | MALE | WHITE | 59 | 660 |  |
| TCGA-39- 5011-01A-01R-  1443-07 | Tumor | LUSC | R0 | Stage IA | M0 | N0 | T1b | Yes | Alive | FEMALE | WHITE | 70 | 4053 |  |
| TCGA-39- 5016-01A-01R-  1443-07 | Tumor | LUSC | R0 | Stage IIA | M0 | N1 | T2a | Yes | Alive | MALE | WHITE | 44 | 3850 |  |
| TCGA-39- 5019-01A-01R-  1820-07 | Tumor | LUSC | R0 | Stage IB | M0 | N0 | T2a | Yes | Alive | MALE | WHITE | 70 | 3387 |  |
| TCGA-39- 5021-01A-01R-  1443-07 | Tumor | LUSC | R0 | Stage IB | M0 | N0 | T2a | Yes | Dead | MALE | WHITE | 70 | 2086 |  |
| TCGA-39- 5022-01A-21R-  1820-07 | Tumor | LUSC | R0 | Stage IB | M0 | N0 | T2a | Yes | Dead | MALE | WHITE | 76 | 1679 |  |
| TCGA-39- 5024-01A-21R-  1820-07 | Tumor | LUSC | R0 | Stage IIIA | M0 | N2 | T2a | Yes | Alive | FEMALE | WHITE | 65 | 2510 |  |
| TCGA-39- 5027-01A-21R-  1820-07 | Tumor | LUSC | R0 | Stage IB | M0 | N0 | T2a | Yes | Alive | MALE | WHITE | 73 | 3108 |  |
| TCGA-39- 5028-01A-01R-  1443-07 | Tumor | LUSC | R0 | Stage IIIA | M0 | N1 | T4 | Yes | Dead | MALE | WHITE | 75 | 52 |  |
| TCGA-39- 5029-01A-01R-  1443-07 | Tumor | LUSC | R0 | Stage IIIA | M0 | N2 | T1b | Yes | Dead | MALE | WHITE | 67 | 740 |  |
| TCGA-39- 5030-01A-01R-  1443-07 | Tumor | LUSC | R0 | Stage IIIA | M0 | N2 | T2a | Yes | Dead | FEMALE | ASIAN | 81 | 59 |  |
| TCGA-39- 5031-01A-01R-  1443-07 | Tumor | LUSC | R0 | Stage IA | M0 | N0 | T1a | Yes | Alive | FEMALE | Not Available | 76 | 1841 |  |
| TCGA-39- 5034-01A-01R-  1443-07 | Tumor | LUSC | R0 | Stage IIB | M0 | N0 | T3 | Yes | Dead | FEMALE | WHITE | 73 | 1107 |  |
| TCGA-39- 5035-01A-01R-  1443-07 | Tumor | LUSC | R0 | Stage IA | M0 | N0 | T1b | Yes | Alive | FEMALE | WHITE | 72 | 2080 |  |
| TCGA-39- 5036-01A-01R-  1443-07 | Tumor | LUSC | R0 | Stage IB | M0 | N0 | T2 | Yes | Alive | MALE | WHITE | 73 | 2165 |  |
| TCGA-39- 5037-01A-01R-  1443-07 | Tumor | LUSC | R0 | Stage IIA | M0 | N1 | T1b | Yes | Alive | MALE | WHITE | 65 | 1690 |  |
| TCGA-39- 5039-01A-01R-  1443-07 | Tumor | LUSC | R0 | Stage IIA | M0 | N0 | T2b | Yes | Dead | MALE | WHITE | 76 | 544 |  |
| TCGA-39- 5040-01A-21R-  2125-07 | Tumor | LUSC | R0 | Stage IIIA | M0 | N2 | T2a | Yes | Dead | MALE | WHITE | 59 | 519 |  |
| TCGA-39- 5040-11A-01R-  2125-07 | Normal | LUSC | R0 | Stage IIIA | M0 | N2 | T2a | Yes | Dead | MALE | WHITE | 59 | 519 |  |
| TCGA-43- 2576-01A-01R- A32Z-07 | Tumor | LUSC | R0 | Stage IIIA | M0 | N2 | T2 | Yes | Alive | FEMALE | WHITE | 62 | 1223 |  |
| TCGA-43- 2578-01A-01R-  0851-07 | Tumor | LUSC | R0 | Stage IA | M0 | N0 | T1 | Yes | Alive | FEMALE | WHITE | 59 | 684 |  |
| TCGA-43- 2581-01A-01R-  0851-07 | Tumor | LUSC | R0 | Stage IIIA | M0 | N1 | T3 | Yes | Alive | FEMALE | WHITE | 47 | 1176 |  |
| TCGA-43- 3394-01A-01R-  0980-07 | Tumor | LUSC | R0 | Stage IB | M0 | N0 | T2a | Yes | Alive | MALE | BLACK OR AFRICAN AMERICAN | 52 | 1190 |  |
| TCGA-43- 3920-01A-01R-  0980-07 | Tumor | LUSC | R0 | Stage IB | M0 | N0 | T2 | Yes | Alive | MALE | WHITE | 71 | 1007 |  |
| TCGA-43- 5668-01A-01R-  1635-07 | Tumor | LUSC | Not Available | Stage IIA | M0 | N1 | T1b | Yes | Alive | MALE | WHITE | 78 | 559 |  |
| TCGA-43- 5670-01A-21R-  2125-07 | Tumor | LUSC | Not Available | Stage IIA | M0 | N0 | T2b | Yes | Alive | MALE | WHITE | 70 | 849 |  |
| TCGA-43- 5670-11A-01R-  2125-07 | Normal | LUSC | Not Available | Stage IIA | M0 | N0 | T2b | Yes | Alive | MALE | WHITE | 70 | 849 |  |
| TCGA-43- 6143-01A-11R-  1820-07 | Tumor | LUSC | RX | Stage IB | M0 | N0 | T2 | Yes | Alive | MALE | WHITE | 70 | 699 |  |
| TCGA-43- 6143-11A-01R-  1820-07 | Normal | LUSC | RX | Stage IB | M0 | N0 | T2 | Yes | Alive | MALE | WHITE | 70 | 699 |  |
| TCGA-43- 6647-01A-11R-  1820-07 | Tumor | LUSC | RX | Stage IIB | MX | N1 | T2b | Yes | Alive | FEMALE | WHITE | 69 | 757 |  |
| TCGA-43- 6647-11A-01R-  1820-07 | Normal | LUSC | RX | Stage IIB | MX | N1 | T2b | Yes | Alive | FEMALE | WHITE | 69 | 757 |  |
| TCGA-43- 6770-01A-11R-  1820-07 | Tumor | LUSC | RX | Stage IB | MX | N0 | T2a | Yes | Alive | FEMALE | BLACK OR AFRICAN AMERICAN | 59 | 653 |  |
| TCGA-43- 6771-01A-11R-  1820-07 | Tumor | LUSC | RX | Stage IB | MX | N0 | T2 | Yes | Dead | MALE | WHITE | 85 | 166 |  |
| TCGA-43- 6771-11A-01R-  1820-07 | Normal | LUSC | RX | Stage IB | MX | N0 | T2 | Yes | Dead | MALE | WHITE | 85 | 166 |  |
| TCGA-43- 6773-01A-41R-  1949-07 | Tumor | LUSC | Not Available | Stage IIB | MX | N1 | T2 | Yes | Dead | MALE | WHITE | 76 | 116 |  |
| TCGA-43- 6773-11A-01R-  1949-07 | Normal | LUSC | Not Available | Stage IIB | MX | N1 | T2 | Yes | Dead | MALE | WHITE | 76 | 116 |  |
| TCGA-43- 7656-01A-11R-  2125-07 | Tumor | LUSC | Not Available | Stage IA | MX | N0 | T1b | Yes | Alive | MALE | WHITE | 71 | 596 |  |
| TCGA-43- 7657-01A-31R-  2125-07 | Tumor | LUSC | Not Available | Stage IA | MX | N0 | T1 | Yes | Alive | FEMALE | WHITE | 68 | 236 |  |
| TCGA-43- 7657-11A-01R-  2125-07 | Normal | LUSC | Not Available | Stage IA | MX | N0 | T1 | Yes | Alive | FEMALE | WHITE | 68 | 236 |  |
| TCGA-43- 7658-01A-11R-  2125-07 | Tumor | LUSC | Not Available | Stage IA | M0 | N0 | T1 | Yes | Alive | FEMALE | WHITE | 75 | 2378 |  |
| TCGA-43- 7658-11A-01R-  2125-07 | Normal | LUSC | Not Available | Stage IA | M0 | N0 | T1 | Yes | Alive | FEMALE | WHITE | 75 | 2378 |  |
| TCGA-43- 8115-01A-11R-  2247-07 | Tumor | LUSC | R0 | Stage IIA | MX | N1 | T2a | Yes | Alive | FEMALE | WHITE | 72 | 407 |  |
| TCGA-43- 8116-01A-11R-  2247-07 | Tumor | LUSC | Not Available | Stage IA | M0 | N0 | T1b | Yes | Alive | MALE | WHITE | 73 | 358 |  |
| TCGA-43- 8118-01A-11R-  2403-07 | Tumor | LUSC | Not Evaluated | Stage IA | M0 | N0 | T1b | Yes | Dead | FEMALE | WHITE | 55 | 89 |  |
| TCGA-43- A474-01A-11R- A24H-07 | Tumor | LUSC | R0 | Stage IIA | M0 | N0 | T2b | Yes | Alive | MALE | WHITE | 66 | 353 |  |
| TCGA-43- A475-01A-11R- A24H-07 | Tumor | LUSC | R1 | Stage IIB | M0 | N0 | T3 | Yes | Alive | FEMALE | WHITE | 67 | 296 |  |
| TCGA-43- A56U-01A- 11R-A26W-07 | Tumor | LUSC | R0 | Stage IA | MX | N0 | T1b | Yes | Alive | FEMALE | WHITE | 76 | 432 |  |
| TCGA-43- A56V-01A-11R- A26W-07 | Tumor | LUSC | Not Available | Stage IIIA | M0 | N2 | T2a | Yes | Alive | MALE | BLACK OR AFRICAN AMERICAN | 61 | 366 |  |
| TCGA-46- 3765-01A-01R-  0980-07 | Tumor | LUSC | R0 | Stage IA | M0 | N0 | T1 | Yes | Alive | FEMALE | WHITE | 59 | 405 |  |
| TCGA-46- 3766-01A-01R-  0980-07 | Tumor | LUSC | R0 | Stage IA | M0 | N0 | T1 | Yes | Alive | FEMALE | WHITE | 62 | 370 |  |
| TCGA-46- 3767-01A-01R-  0980-07 | Tumor | LUSC | R0 | Stage IA | M0 | N0 | T1a | Yes | Alive | MALE | WHITE | 76 | 396 |  |
| TCGA-46- 3768-01A-01R-  0980-07 | Tumor | LUSC | R0 | Stage IIIA | M0 | N1 | T3 | Yes | Dead | MALE | WHITE | 58 | 299 |  |
| TCGA-46- 3769-01A-01R-  0980-07 | Tumor | LUSC | R1 | Discrepancy | M0 | N0 | T4 | Yes | Alive | MALE | WHITE | 57 | 135 |  |
| TCGA-46- 6025-01A-11R-  1820-07 | Tumor | LUSC | R0 | Stage IIB | M0 | N1 | T2b | Yes | Alive | MALE | WHITE | 71 | 324 |  |
| TCGA-46- 6026-01A-11R-  1820-07 | Tumor | LUSC | R2 | Stage IIB | M0 | N1 | T2a | Yes | Alive | MALE | WHITE | 81 | 423 |  |
| TCGA-51- 4079-01A-01R-  1100-07 | Tumor | LUSC | R0 | Stage IB | Not Available | N0 | T2 | Yes | Dead | FEMALE | BLACK OR AFRICAN AMERICAN | 73 | 12 |  |
| TCGA-51- 4079-11A-01R-  1758-07 | Normal | LUSC | R0 | Stage IB | Not Available | N0 | T2 | Yes | Dead | FEMALE | BLACK OR AFRICAN AMERICAN | 73 | 12 |  |
| TCGA-51- 4080-01A-01R-  1100-07 | Tumor | LUSC | R0 | Stage IIIB | Not Available | N1 | T4 | Yes | Dead | MALE | BLACK OR AFRICAN AMERICAN | 65 | 12 |  |
| TCGA-51- 4081-01A-01R-  1100-07 | Tumor | LUSC | R0 | Stage IIB | M0 | N1 | T2a | Yes | Alive | MALE | WHITE | 55 | 911 |  |
| TCGA-51- 4081-11A-01R-  1758-07 | Normal | LUSC | R0 | Stage IIB | M0 | N1 | T2a | Yes | Alive | MALE | WHITE | 55 | 911 |  |
| TCGA-51- 6867-01A-11R-  2045-07 | Tumor | LUSC | R0 | Stage I | M0 | N0 | T1 | Yes | Dead | FEMALE | WHITE | 72 | 1856 |  |
| TCGA-52- 7622-01A-11R-  2125-07 | Tumor | LUSC | R0 | Stage IA | M0 | N0 | T1a | Yes | Alive | FEMALE | WHITE | 62 | 862 |  |
| TCGA-52- 7809-01A-21R-  2125-07 | Tumor | LUSC | R0 | Stage IB | M0 | N0 | T2 | Yes | Dead | MALE | WHITE | 74 | 166 |  |
| TCGA-52- 7810-01A-11R-  2125-07 | Tumor | LUSC | Not Available | Stage IIB | M0 | N0 | T3 | Yes | Alive | FEMALE | WHITE | 60 | 923 |  |
| TCGA-52- 7811-01A-11R-  2125-07 | Tumor | LUSC | R0 | Stage IB | M0 | N0 | T2 | Yes | Dead | MALE | WHITE | 67 | 266 |  |
| TCGA-52- 7812-01A-11R-  2125-07 | Tumor | LUSC | R0 | Discrepancy | M0 | N2 | T2 | Yes | Dead | MALE | WHITE | 68 | 835 |  |
| TCGA-56- 1622-01A-01R-  0692-07 | Tumor | LUSC | R0 | Stage IB | M0 | N0 | T2 | Yes | Dead | MALE | WHITE | 58 | 881 |  |
| TCGA-56- 5897-01A-11R-  1635-07 | Tumor | LUSC | Not Available | Stage IA | MX | N0 | T1b | Yes | Alive | MALE | WHITE | 74 | 378 |  |
| TCGA-56- 5898-01A-11R-  1635-07 | Tumor | LUSC | R0 | Stage IA | M0 | N0 | T1b | Yes | Alive | MALE | WHITE | 69 | 555 |  |
| TCGA-56- 6545-01A-11R-  1820-07 | Tumor | LUSC | R0 | Stage IB | M0 | N0 | T2a | Yes | Alive | FEMALE | WHITE | 77 | 666 |  |
| TCGA-56- 6546-01A-11R-  1820-07 | Tumor | LUSC | Not Available | Stage IIA | MX | N0 | T2b | Yes | Alive | MALE | WHITE | 67 |  |  |
| TCGA-56- 7221-01A-11R-  2045-07 | Tumor | LUSC | R0 | Stage IB | M0 | N0 | T2 | Yes | Alive | MALE | WHITE | 79 | 608 |  |
| TCGA-56- 7222-01A-11R-  2045-07 | Tumor | LUSC | Not Available | Stage IB | M0 | N0 | T2a | Yes | Alive | MALE | WHITE | 60 | 562 |  |
| TCGA-56- 7222-11A-01R-  2045-07 | Normal | LUSC | Not Available | Stage IB | M0 | N0 | T2a | Yes | Alive | MALE | WHITE | 60 | 562 |  |
| TCGA-56- 7223-01A-11R-  2045-07 | Tumor | LUSC | R0 | Stage IIIA | MX | N1 | T3 | Yes | Alive | MALE | WHITE | 66 | 442 |  |
| TCGA-56- 7579-01A-11R-  2045-07 | Tumor | LUSC | R0 | Stage IIIA | M0 | N1 | T3 | Yes | Alive | MALE | WHITE | 61 | 951 |  |
| TCGA-56- 7579-11A-01R-  2045-07 | Normal | LUSC | R0 | Stage IIIA | M0 | N1 | T3 | Yes | Alive | MALE | WHITE | 61 | 951 |  |
| TCGA-56- 7580-01A-11R-  2045-07 | Tumor | LUSC | R0 | Stage IB | M0 | N0 | T2a | Yes | Alive | MALE | WHITE | 84 | 925 |  |
| TCGA-56- 7580-11A-01R-  2045-07 | Normal | LUSC | R0 | Stage IB | M0 | N0 | T2a | Yes | Alive | MALE | WHITE | 84 | 925 |  |
| TCGA-56- 7582-01A-11R-  2045-07 | Tumor | LUSC | R0 | Stage IB | M0 | N0 | T2a | Yes | Alive | MALE | WHITE | 83 | 601 |  |
| TCGA-56- 7582-11A-01R-  2045-07 | Normal | LUSC | R0 | Stage IB | M0 | N0 | T2a | Yes | Alive | MALE | WHITE | 83 | 601 |  |
| TCGA-56- 7730-01A-11R-  2125-07 | Tumor | LUSC | R1 | Stage IIA | M0 | N0 | T2b | Yes | Alive | MALE | WHITE | 73 | 198 |  |
| TCGA-56- 7730-11A-01R-  2125-07 | Normal | LUSC | R1 | Stage IIA | M0 | N0 | T2b | Yes | Alive | MALE | WHITE | 73 | 198 |  |
| TCGA-56- 7731-01A-11R-  2125-07 | Tumor | LUSC | Not Available | Stage IB | MX | N0 | T2a | Yes | Alive | FEMALE | WHITE | 66 | 3 |  |
| TCGA-56- 7731-11A-01R-  2125-07 | Normal | LUSC | Not Available | Stage IB | MX | N0 | T2a | Yes | Alive | FEMALE | WHITE | 66 | 3 |  |
| TCGA-56- 7822-01A-11R-  2125-07 | Tumor | LUSC | R0 | Stage IIB | M0 | N1 | T2b | Yes | Alive | MALE | BLACK OR AFRICAN AMERICAN | 75 | 532 |  |
| TCGA-56- 7823-01B-11R-  2247-07 | Tumor | LUSC | Not Available | Stage IIA | M0 | N1 | T1b | Yes | Alive | FEMALE | WHITE | 58 | 1011 |  |
| TCGA-56- 7823-11A-01R-  2247-07 | Normal | LUSC | Not Available | Stage IIA | M0 | N1 | T1b | Yes | Alive | FEMALE | WHITE | 58 | 1011 |  |
| TCGA-56- 8082-01A-11R-  2247-07 | Tumor | LUSC | R0 | Stage IIA | MX | N0 | T2b | Yes | Alive | FEMALE | WHITE | 80 | 455 |  |
| TCGA-56- 8082-11A-01R-  2247-07 | Normal | LUSC | R0 | Stage IIA | MX | N0 | T2b | Yes | Alive | FEMALE | WHITE | 80 | 455 |  |
| TCGA-56- 8083-01A-11R-  2247-07 | Tumor | LUSC | R0 | Stage IB | MX | N0 | T2a | Yes | Alive | MALE | WHITE | 56 | 150 |  |
| TCGA-56- 8083-11A-01R-  2247-07 | Normal | LUSC | R0 | Stage IB | MX | N0 | T2a | Yes | Alive | MALE | WHITE | 56 | 150 |  |
| TCGA-56- 8201-01A-11R-  2247-07 | Tumor | LUSC | R0 | Stage IIB | MX | N0 | T3 | Yes | Alive | MALE | WHITE | 74 | 397 |  |
| TCGA-56- 8201-11A-01R-  2247-07 | Normal | LUSC | R0 | Stage IIB | MX | N0 | T3 | Yes | Alive | MALE | WHITE | 74 | 397 |  |
| TCGA-56- 8304-01A-11R-  2326-07 | Tumor | LUSC | R0 | Stage IA | MX | N0 | T1b | Yes | Alive | FEMALE | WHITE | 73 | 106 |  |
| TCGA-56- 8305-01A-11R-  2296-07 | Tumor | LUSC | R0 | Stage IB | M0 | N0 | T2a | Yes | Alive | MALE | WHITE | 72 | 105 |  |
| TCGA-56- 8307-01A-11R-  2296-07 | Tumor | LUSC | R0 | Stage IIB | M0 | N0 | T3 | Yes | Alive | FEMALE | WHITE | 55 | 818 |  |
| TCGA-56- 8308-01A-11R-  2296-07 | Tumor | LUSC | R1 | Stage IIB | MX | N0 | T3 | Yes | Alive | MALE | WHITE | 79 | 517 |  |
| TCGA-56- 8309-01A-11R-  2296-07 | Tumor | LUSC | R0 | Stage IA | MX | N0 | T1b | Yes | Alive | MALE | WHITE | 66 | 428 |  |
| TCGA-56- 8309-11A-01R-  2296-07 | Normal | LUSC | R0 | Stage IA | MX | N0 | T1b | Yes | Alive | MALE | WHITE | 66 | 428 |  |
| TCGA-56- 8503-01A-11R-  2403-07 | Tumor | LUSC | R0 | Stage IIB | M0 | N0 | T3 | Yes | Alive | FEMALE | WHITE | 76 | 41 |  |
| TCGA-56- 8504-01A-11R-  2403-07 | Tumor | LUSC | R0 | Stage IB | MX | N0 | T2a | Yes | Alive | MALE | WHITE | 74 | 510 |  |
| TCGA-56- 8622-01A-11R-  2403-07 | Tumor | LUSC | R0 | Stage IB | M0 | N0 | T2a | Yes | Alive | MALE | WHITE | 68 | 55 |  |
| TCGA-56- 8623-01A-11R- A28V-07 | Tumor | LUSC | R0 | Stage IB | MX | N0 | T2a | Yes | Alive | MALE | WHITE | 71 | 692 |  |
| TCGA-56- 8623-11A-01R- A28V-07 | Normal | LUSC | R0 | Stage IB | MX | N0 | T2a | Yes | Alive | MALE | WHITE | 71 | 692 |  |
| TCGA-56- 8624-01A-11R-  2403-07 | Tumor | LUSC | R0 | Stage IIB | MX | N0 | T3 | Yes | Alive | MALE | WHITE | 84 | 420 |  |
| TCGA-56- 8625-01A-11R-  2403-07 | Tumor | LUSC | RX | Stage IIIA | MX | N1 | T3 | Yes | Alive | FEMALE | WHITE | 66 | 315 |  |
| TCGA-56- 8626-01A-11R-  2403-07 | Tumor | LUSC | R0 | Stage IA | MX | N0 | T1a | Yes | Alive | MALE | WHITE | 59 | 302 |  |
| TCGA-56- 8628-01A-11R-  2403-07 | Tumor | LUSC | R0 | Stage IA | MX | N0 | T1b | Yes | Alive | MALE | WHITE | 78 | 616 |  |
| TCGA-56- 8629-01A-11R-  2403-07 | Tumor | LUSC | R0 | Stage IIA | MX | N0 | T2b | Yes | Alive | MALE | WHITE | 63 | 481 |  |
| TCGA-56- A49D-01A- 11R-A24H-07 | Tumor | LUSC | R0 | Stage IIIA | MX | N2 | T2a | Yes | Alive | MALE | WHITE | 67 | 637 |  |
| TCGA-56- A4BW-01A- 11R-A24H-07 | Tumor | LUSC | R0 | Stage IIA | M0 | N1 | T2a | Yes | Alive | MALE | WHITE | 55 | 585 |  |
| TCGA-56- A4BX-01A- 11R-A24H-07 | Tumor | LUSC | R0 | Stage IIA | MX | N0 | T2b | Yes | Alive | MALE | WHITE | 70 | 405 |  |
| TCGA-56- A4BY-01A-11R- A24H-07 | Tumor | LUSC | RX | Stage IB | MX | N0 | T2a | Yes | Alive | MALE | WHITE | 66 | 543 |  |
| TCGA-56- A4ZJ-01A-11R- A262-07 | Tumor | LUSC | R0 | Stage IA | M0 | N0 | T1a | Yes | Alive | FEMALE | WHITE | 75 | 640 |  |
| TCGA-56-  A4ZK-01A- 11R-A262-07 | Tumor | LUSC | R1 | Stage IB | M0 | N0 | T2 | Yes | Alive | FEMALE | WHITE | 76 | 570 |  |
| TCGA-56- A5DR-01A- 11R-A27Q-07 | Tumor | LUSC | R0 | Stage IA | MX | N0 | T1a | No | Alive | MALE | WHITE | 81 | 4 |  |
| TCGA-56- A5DS-01A- 11R-A27Q-07 | Tumor | LUSC | R0 | Stage IB | MX | N0 | T2a | Yes | Alive | FEMALE | WHITE | 72 | 8 |  |
| TCGA-56- A62T-01A-11R- A405-07 | Tumor | LUSC | R1 | Stage IIA | MX | N0 | T2b | Yes | Alive | MALE | BLACK OR AFRICAN AMERICAN | 78 | 440 |  |
| TCGA-58- 8386-01A-11R-  2296-07 | Tumor | LUSC | R0 | Stage IV | M1 | NX | T3 | Yes | Dead | MALE | Not Evaluated | 75 | 1 |  |
| TCGA-58- 8386-11A-01R-  2296-07 | Normal | LUSC | R0 | Stage IV | M1 | NX | T3 | Yes | Dead | MALE | Not Evaluated | 75 | 1 |  |
| TCGA-58- 8387-01A-11R-  2296-07 | Tumor | LUSC | R0 | Stage IIA | M0 | N0 | T2b | Yes | Dead | MALE | WHITE | 60 | 403 |  |
| TCGA-58- 8388-01A-11R-  2326-07 | Tumor | LUSC | R0 | Stage IB | M0 | N0 | T2a | Yes | Alive | MALE | WHITE | 60 | 412 |  |
| TCGA-58- 8390-01A-11R-  2326-07 | Tumor | LUSC | R0 | Stage IIA | M0 | N0 | T2b | Yes | Alive | MALE | WHITE | 70 | 911 |  |
| TCGA-58- 8391-01A-11R-  2326-07 | Tumor | LUSC | R0 | Stage IIIA | M0 | N2 | T2 | Yes | Alive | FEMALE | WHITE | 57 | 2167 |  |
| TCGA-58- 8392-01A-11R-  2326-07 | Tumor | LUSC | R0 | Stage IB | M0 | N0 | T2a | Yes | Dead | MALE | WHITE | 70 | 501 |  |
| TCGA-58- 8393-01A-11R-  2326-07 | Tumor | LUSC | R0 | Stage IB | M0 | N0 | T2a | Yes | Alive | FEMALE | WHITE | 68 | 1058 |  |
| TCGA-58- A46J-01A-11R- A24H-07 | Tumor | LUSC | R0 | Stage IIB | M0 | N1 | T2 | Yes | Alive | MALE | WHITE | 64 | 2589 |  |
| TCGA-58-  A46K-01A-11R- A24H-07 | Tumor | LUSC | R0 | Stage IIIA | M0 | N2 | T2 | Yes | Dead | MALE | WHITE | 59 | 1045 |  |
| TCGA-58- A46L-01A-11R- A24H-07 | Tumor | LUSC | R0 | Stage IIIA | M0 | N2 | T2 | Yes | Alive | MALE | WHITE | 73 | 1723 |  |
| TCGA-58- A46M-01A- 11R-A24H-07 | Tumor | LUSC | R0 | Stage IIB | M0 | N1 | T2b | Yes | Alive | MALE | WHITE | 61 | 1072 |  |
| TCGA-58- A46N-01A- 11R-A24H-07 | Tumor | LUSC | R0 | Stage IB | M0 | N0 | T2a | Yes | Alive | MALE | WHITE | 52 | 910 |  |
| TCGA-60- 2695-01A-01R-  0851-07 | Tumor | LUSC | R0 | Stage IB | M0 | N0 | T2 | Yes | Alive | FEMALE | WHITE | 74 | 642 |  |
| TCGA-60- 2696-01A-01R-  0851-07 | Tumor | LUSC | RX | Stage IIA | M0 | N0 | T2 | Yes | Dead | FEMALE | BLACK OR AFRICAN AMERICAN | 76 | 109 |  |
| TCGA-60- 2697-01A-11R-  2125-07 | Tumor | LUSC | RX | Stage IIA | M0 | N2 | T2 | Not Available | Dead | MALE | WHITE | 41 | 372 |  |
| TCGA-60- 2698-01A-01R-  0851-07 | Tumor | LUSC | RX | Stage IIB | M0 | N1 | T2 | Yes | Dead | MALE | WHITE | 62 | 311 |  |
| TCGA-60- 2703-01A-11R-  2045-07 | Tumor | LUSC | R0 | Stage IIB | M0 | N1 | T2 | Yes | Dead | MALE | WHITE | 73 | 2945 |  |
| TCGA-60- 2704-01A-11R-  2045-07 | Tumor | LUSC | R0 | Stage IIB | M0 | N1 | T2 | Yes | Dead | MALE | WHITE | 73 | 1154 |  |
| TCGA-60- 2706-01A-01R-  0851-07 | Tumor | LUSC | Not Available | Stage IA | M0 | N0 | T1 | Yes | Alive | MALE | WHITE | 58 | 2820 |  |
| TCGA-60- 2707-01A-01R-  0851-07 | Tumor | LUSC | RX | Stage IB | M0 | N0 | T2 | Yes | Dead | MALE | Not Available | 70 | 667 |  |
| TCGA-60- 2708-01A-01R-  0851-07 | Tumor | LUSC | R0 | Stage IIB | M0 | N1 | T2 | Yes | Alive | FEMALE | WHITE | 64 | 2447 |  |
| TCGA-60- 2709-01A-21R-  1820-07 | Tumor | LUSC | R0 | Stage IB | MX | N0 | T2 | Yes | Alive | MALE | BLACK OR AFRICAN AMERICAN | 69 | 1505 |  |
| TCGA-60- 2709-11A-01R-  1820-07 | Normal | LUSC | R0 | Stage IB | MX | N0 | T2 | Yes | Alive | MALE | BLACK OR AFRICAN AMERICAN | 69 | 1505 |  |
| TCGA-60- 2710-01A-01R-  0851-07 | Tumor | LUSC | Not Available | Stage IIA | M0 | N1 | T1 | Yes | Alive | FEMALE | WHITE | 67 | 2024 |  |
| TCGA-60- 2711-01A-01R-  0851-07 | Tumor | LUSC | R0 | Stage IB | M0 | N0 | T2 | Yes | Alive | FEMALE | WHITE | 64 | 1260 |  |
| TCGA-60- 2712-01A-01R-  0851-07 | Tumor | LUSC | R0 | Stage IIB | M0 | N1 | T2 | Yes | Dead | FEMALE | WHITE | 79 | 274 |  |
| TCGA-60- 2713-01A-01R-  0851-07 | Tumor | LUSC | R0 | Stage IB | M0 | N0 | T2 | Yes | Alive | MALE | WHITE | 64 | 1731 |  |
| TCGA-60- 2714-01A-01R-  0851-07 | Tumor | LUSC | R0 | Stage IIB | M0 | N1 | T2 | Yes | Alive | FEMALE | WHITE | 66 | 1531 |  |
| TCGA-60- 2715-01A-01R-  0851-07 | Tumor | LUSC | RX | Stage IA | M0 | N0 | T1 | Yes | Dead | MALE | WHITE | 51 | 1075 |  |
| TCGA-60- 2716-01A-01R-  0851-07 | Tumor | LUSC | R0 | Stage IIB | M0 | N1 | T2 | No | Alive | MALE | Not Available | 39 | 1475 |  |
| TCGA-60- 2719-01A-01R-  0851-07 | Tumor | LUSC | R0 | Stage IB | M0 | N0 | T1 | Yes | Alive | FEMALE | WHITE | 83 | 1297 |  |
| TCGA-60- 2720-01A-01R-  0851-07 | Tumor | LUSC | R0 | Stage IB | M0 | N0 | T2 | Yes | Alive | FEMALE | WHITE | 60 | 97 |  |
| TCGA-60- 2721-01A-01R-  0851-07 | Tumor | LUSC | R0 | Stage IB | M0 | N0 | T2 | Yes | Alive | MALE | WHITE | 73 | 983 |  |
| TCGA-60- 2722-01A-01R-  0851-07 | Tumor | LUSC | R0 | Stage IIB | M0 | N1 | T2 | Yes | Alive | MALE | WHITE | 66 | 908 |  |
| TCGA-60- 2723-01A-01R-  0851-07 | Tumor | LUSC | R0 | Stage IB | M0 | N0 | T2 | Yes | Alive | FEMALE | WHITE | 74 | 1092 |  |
| TCGA-60- 2724-01A-01R-  0851-07 | Tumor | LUSC | R0 | Stage IIIA | M0 | N1 | T3 | Yes | Alive | MALE | WHITE | 47 | 717 |  |
| TCGA-60- 2725-01A-01R-  1201-07 | Tumor | LUSC | R0 | Stage IB | M0 | N0 | T2 | Yes | Alive | MALE | WHITE | 74 | 816 |  |
| TCGA-60- 2726-01A-01R-  0851-07 | Tumor | LUSC | R0 | Stage IIA | M0 | N1 | T2 | Yes | Dead | MALE | WHITE | 56 | 358 |  |
| TCGA-63- 5128-01A-01R-  1443-07 | Tumor | LUSC | R0 | Stage IB | M0 | N0 | T2 | Yes | Dead | MALE | Not Available | Not Available |  |  |
| TCGA-63- 5131-01A-01R-  1443-07 | Tumor | LUSC | R0 | Stage IIB | M0 | N1 | T2 | Yes | Dead | MALE | Not Available | Not Available |  |  |
| TCGA-63- 6202-01A-11R-  1820-07 | Tumor | LUSC | R0 | Stage IIA | M0 | N0 | T2 | Yes | Alive | MALE | Not Available | Not Available | 1602 |  |
| TCGA-63- 7020-01A-11R-  1949-07 | Tumor | LUSC | R0 | Stage IA | M0 | N0 | T1 | Yes | Alive | MALE | Not Available | Not Available | 2133 |  |
| TCGA-63- 7021-01A-11R-  1949-07 | Tumor | LUSC | R0 | Stage IA | M0 | N0 | T1 | Yes | Alive | MALE | Not Available | Not Available | 2142 |  |
| TCGA-63- 7022-01A-11R-  1949-07 | Tumor | LUSC | R0 | Stage IA | M0 | N0 | T1 | Yes | Alive | FEMALE | Not Available | Not Available | 2073 |  |
| TCGA-63- 7023-01A-11R-  1949-07 | Tumor | LUSC | R0 | Stage IIA | M0 | N1 | T1 | Yes | Alive | MALE | Not Available | Not Available | 1682 |  |
| TCGA-63- A5M9-01A- 11R-A26W-07 | Tumor | LUSC | RX | Stage IIB | M0 | N1 | T2 | Yes | Alive | FEMALE | Not Evaluated | Not Available | 0 |  |
| TCGA-63-  A5MB-01A- 11R-A26W-07 | Tumor | LUSC | R0 | Stage IB | M0 | N0 | T2 | Yes | Alive | MALE | Not Evaluated | 62 | 3123 |  |
| TCGA-63- A5MG-01A- 12R-A27Q-07 | Tumor | LUSC | R0 | Stage IB | M0 | N0 | T2 | Yes | Alive | MALE | Not Evaluated | 68 | 2148 |  |
| TCGA-63- A5MH-01A- 12R-A27Q-07 | Tumor | LUSC | R0 | Stage IA | M0 | N0 | T1 | Yes | Alive | MALE | Not Evaluated | 68 | 2026 |  |
| TCGA-63- A5MI-01A-12R- A27Q-07 | Tumor | LUSC | R0 | Stage IIIA | M0 | N2 | T2 | Yes | Alive | MALE | Not Evaluated | 65 | 1784 |  |
| TCGA-63- A5MJ-01A- 11R-A27Q-07 | Tumor | LUSC | R0 | Stage IIB | M0 | N1 | T2 | Yes | Alive | MALE | Not Evaluated | 54 | 1824 |  |
| TCGA-63- A5ML-01A- 31R-A27Q-07 | Tumor | LUSC | R0 | Stage IB | M0 | N0 | T2 | Yes | Alive | MALE | Not Evaluated | 68 | 1386 |  |
| TCGA-63- A5MM-01A- 11R-A26W-07 | Tumor | LUSC | R0 | Stage IIB | M0 | N1 | T2 | Yes | Dead | FEMALE | Not Evaluated | 69 | 456 |  |
| TCGA-63-  A5MN-01A- 22R-A27Q-07 | Tumor | LUSC | R1 | Stage IIB | M0 | N0 | T3 | No | Dead | FEMALE | Not Evaluated | 78 | 345 |  |
| TCGA-63- A5MP-01A- 11R-A26W-07 | Tumor | LUSC | R0 | Stage IIB | M0 | N1 | T2 | Yes | Alive | MALE | Not Evaluated | 56 | 769 |  |
| TCGA-63- A5MR-01A- 31R-A27Q-07 | Tumor | LUSC | R0 | Stage IB | M0 | N0 | T2 | Yes | Alive | FEMALE | Not Evaluated | 70 | 2716 |  |
| TCGA-63- A5MS-01A- 11R-A26W-07 | Tumor | LUSC | R0 | Stage IB | M0 | N0 | T2 | Yes | Alive | MALE | Not Evaluated | 78 | 2381 |  |
| TCGA-63- A5MT-01A- 21R-A26W-07 | Tumor | LUSC | R0 | Stage IIB | M0 | N0 | T3 | Yes | Alive | MALE | Not Evaluated | 74 | 498 |  |
| TCGA-63- A5MU-01A- 11R-A26W-07 | Tumor | LUSC | R0 | Stage IIB | M0 | N1 | T2b | Yes | Dead | MALE | Not Evaluated | 48 |  |  |
| TCGA-63- A5MV-01A- 21R-A26W-07 | Tumor | LUSC | R0 | Stage IIA | M0 | N0 | T2b | Yes | Alive | MALE | Not Evaluated | 69 | 1100 |  |
| TCGA-63-  A5MW-01A- 11R-A26W-07 | Tumor | LUSC | R0 | Stage IB | M0 | N0 | T2 | Yes | Alive | MALE | Not Evaluated | 76 | 1639 |  |
| TCGA-63- A5MY-01A- 11R-A26W-07 | Tumor | LUSC | R0 | Stage IA | M0 | N0 | T1b | Yes | Alive | MALE | Not Evaluated | 63 | 1052 |  |
| TCGA-66- 2727-01A-01R-  0980-07 | Tumor | LUSC | R0 | Stage IB | M0 | N0 | T2 | Yes | Dead | FEMALE | Not Available | 55 | 516 |  |
| TCGA-66- 2734-01A-01R-  0980-07 | Tumor | LUSC | R0 | Stage IB | M0 | N0 | T2 | Yes | Alive | FEMALE | Not Available | 62 | 1311 |  |
| TCGA-66- 2737-01A-01R-  0980-07 | Tumor | LUSC | R0 | Stage IIB | M0 | N1 | T2 | Yes | Alive | MALE | Not Available | 72 | 61 |  |
| TCGA-66- 2742-01A-01R-  0980-07 | Tumor | LUSC | R0 | Stage IV | M1 | N1 | T2 | Yes | Alive | MALE | Not Available | 70 | 641 |  |
| TCGA-66- 2744-01A-01R-  0980-07 | Tumor | LUSC | R0 | Stage IIB | M0 | N1 | T2 | Yes | Alive | MALE | Not Available | 71 | 30 |  |
| TCGA-66- 2753-01A-01R-  0980-07 | Tumor | LUSC | R0 | Stage IB | M0 | N0 | T2 | Yes | Alive | MALE | Not Available | 69 | 31 |  |
| TCGA-66- 2754-01A-01R-  0980-07 | Tumor | LUSC | R0 | Stage IIIA | M0 | N2 | T2 | Yes | Alive | MALE | Not Available | 67 | 61 |  |
| TCGA-66- 2755-01A-01R-  0851-07 | Tumor | LUSC | R0 | Stage IB | M0 | N0 | T2 | Yes | Alive | MALE | Not Available | 63 | 28 |  |
| TCGA-66- 2756-01A-01R-  0851-07 | Tumor | LUSC | R0 | Stage IIIB | M0 | N0 | T4 | Yes | Alive | MALE | Not Available | 68 | 30 |  |
| TCGA-66- 2757-01A-01R-  0851-07 | Tumor | LUSC | R0 | Stage IA | M0 | N0 | T1 | Yes | Alive | FEMALE | Not Available | 65 | 1338 |  |
| TCGA-66- 2758-01A-02R-  0851-07 | Tumor | LUSC | R0 | Stage IB | M0 | N0 | T2 | Yes | Alive | MALE | Not Available | 71 | 639 |  |
| TCGA-66- 2759-01A-01R-  0851-07 | Tumor | LUSC | R0 | Stage IIIA | M0 | N2 | T2 | Yes | Alive | MALE | Not Available | 66 | 762 |  |
| TCGA-66- 2763-01A-01R-  0851-07 | Tumor | LUSC | R0 | Stage IB | M0 | N0 | T2 | Yes | Alive | FEMALE | Not Available | 63 | 30 |  |
| TCGA-66- 2765-01A-01R-  0851-07 | Tumor | LUSC | R0 | Stage IB | M0 | N0 | T2 | Yes | Alive | MALE | Not Available | 64 | 61 |  |
| TCGA-66- 2766-01A-01R-  0851-07 | Tumor | LUSC | R0 | Stage IIIA | M0 | N2 | T2 | Yes | Alive | MALE | Not Available | 54 | 31 |  |
| TCGA-66- 2767-01A-01R-  0851-07 | Tumor | LUSC | R0 | Stage IIIB | M0 | N3 | T2 | Yes | Alive | MALE | Not Available | 62 | 61 |  |
| TCGA-66- 2768-01A-01R-  0851-07 | Tumor | LUSC | R0 | Stage IIB | M0 | N1 | T2 | Yes | Alive | MALE | Not Available | 57 | 61 |  |
| TCGA-66- 2769-01A-02R-  0851-07 | Tumor | LUSC | R1 | Stage IIIB | M0 | N0 | T4 | Yes | Dead | MALE | Not Available | 75 | 215 |  |
| TCGA-66- 2770-01A-01R-  0851-07 | Tumor | LUSC | R0 | Stage IB | M0 | N0 | T2 | Yes | Alive | MALE | Not Available | 79 | 700 |  |
| TCGA-66- 2771-01A-01R-  0980-07 | Tumor | LUSC | R0 | Stage IIB | M0 | N1 | T2 | Yes | Alive | MALE | Not Available | 60 | 578 |  |
| TCGA-66- 2773-01A-01R-  1201-07 | Tumor | LUSC | R0 | Stage IB | M0 | N0 | T2 | Yes | Dead | MALE | Not Available | 69 | 92 |  |
| TCGA-66- 2777-01A-01R-  1201-07 | Tumor | LUSC | R0 | Stage IB | M0 | N0 | T2 | Yes | Alive | MALE | Not Available | 71 | 61 |  |
| TCGA-66- 2778-01A-02R-  0851-07 | Tumor | LUSC | R2 | Stage IIIB | M0 | N3 | T2 | Yes | Alive | FEMALE | Not Available | 68 | 578 |  |
| TCGA-66- 2780-01A-01R-  0851-07 | Tumor | LUSC | R0 | Stage IB | M0 | N0 | T2 | Yes | Dead | MALE | Not Available | 65 | 366 |  |
| TCGA-66- 2781-01A-01R-  0851-07 | Tumor | LUSC | R0 | Stage IB | M0 | N0 | T2 | Yes | Alive | MALE | Not Available | 67 | 121 |  |
| TCGA-66- 2782-01A-01R-  0851-07 | Tumor | LUSC | R0 | Stage IIB | M0 | N0 | T3 | Yes | Dead | MALE | Not Available | 71 | 365 |  |
| TCGA-66- 2783-01A-01R-  1201-07 | Tumor | LUSC | R2 | Stage IIIB | M0 | N3 | T2 | Yes | Alive | MALE | Not Available | 67 | 759 |  |
| TCGA-66- 2785-01A-01R-  0851-07 | Tumor | LUSC | R0 | Stage IB | M0 | N0 | T2 | Yes | Alive | MALE | Not Available | 65 | 60 |  |
| TCGA-66- 2786-01A-01R-  0851-07 | Tumor | LUSC | R0 | Stage IA | M0 | N0 | T1 | Yes | Alive | FEMALE | Not Available | 68 | 790 |  |
| TCGA-66- 2787-01A-01R-  0980-07 | Tumor | LUSC | R0 | Stage IA | M0 | N0 | T1 | Yes | Alive | MALE | Not Available | 57 | 1217 |  |
| TCGA-66- 2788-01A-01R-  0980-07 | Tumor | LUSC | R0 | Stage IB | M0 | N0 | T2 | Yes | Alive | MALE | Not Available | 56 | 699 |  |
| TCGA-66- 2789-01A-01R-  0980-07 | Tumor | LUSC | R0 | Stage IIIB | M0 | N3 | T1 | Yes | Dead | MALE | Not Available | 73 | 123 |  |
| TCGA-66- 2790-01A-01R-  0980-07 | Tumor | LUSC | R0 | Stage IIB | M0 | N1 | T2 | Yes | Alive | MALE | Not Available | 72 | 699 |  |
| TCGA-66- 2791-01A-01R-  0980-07 | Tumor | LUSC | R1 | Stage IIIB | M0 | N3 | T2 | Yes | Dead | MALE | Not Available | 66 | 153 |  |
| TCGA-66- 2792-01A-01R-  0980-07 | Tumor | LUSC | R0 | Stage IIB | M0 | N1 | T2 | Yes | Alive | MALE | Not Available | 58 | 913 |  |
| TCGA-66- 2793-01A-01R-  1201-07 | Tumor | LUSC | R0 | Stage IIIB | M0 | N1 | T4 | Yes | Dead | MALE | Not Available | 68 | 306 |  |
| TCGA-66- 2794-01A-01R-  1201-07 | Tumor | LUSC | R0 | Stage IIIB | M0 | N2 | T4 | Yes | Alive | MALE | Not Available | 64 | 1645 |  |
| TCGA-66- 2795-01A-02R-  0980-07 | Tumor | LUSC | R0 | Stage IIIB | M0 | N1 | T4 | Yes | Alive | MALE | Not Available | 68 | 122 |  |
| TCGA-66- 2800-01A-01R-  1201-07 | Tumor | LUSC | R0 | Stage IIIB | M0 | N0 | T4 | Yes | Alive | MALE | Not Available | 70 | 1492 |  |
| TCGA-68- 7755-01A-11R-  2125-07 | Tumor | LUSC | Not Available | Stage IIA | M0 | N1 | T1b | Yes | Alive | FEMALE | WHITE | 60 | 83 |  |
| TCGA-68- 7756-01A-11R-  2125-07 | Tumor | LUSC | Not Available | Stage IIIA | MX | N1 | T4 | Yes | Alive | MALE | WHITE | 84 | 202 |  |
| TCGA-68- 7757-01B-11R-  2296-07 | Tumor | LUSC | Not Available | Stage IA | MX | N0 | T1b | Yes | Alive | MALE | WHITE | 74 | 211 |  |
| TCGA-68- 8250-01A-11R-  2296-07 | Tumor | LUSC | Not Available | Stage IA | MX | N0 | T1a | Yes | Alive | MALE | BLACK OR AFRICAN AMERICAN | 66 | 244 |  |
| TCGA-68- 8251-01A-11R-  2296-07 | Tumor | LUSC | Not Available | Stage IB | M0 | N0 | T2a | Yes | Alive | MALE | WHITE | 78 | 406 |  |
| TCGA-68-A59I- 01A-11R-A262-  07 | Tumor | LUSC | Not Evaluated | Stage IIIA | M0 | N1 | T3 | Yes | Alive | FEMALE | BLACK OR AFRICAN AMERICAN | 73 | 492 |  |
| TCGA-68-  A59J-01A-21R- A26W-07 | Tumor | LUSC | R0 | Stage IB | MX | N0 | T2a | Yes | Alive | FEMALE | WHITE | 74 | 448 |  |
| TCGA-6A- AB49-01A- 12R-A405-07 | Tumor | LUSC | RX | Stage IB | MX | N0 | T2 | Yes | Dead | FEMALE | BLACK OR AFRICAN AMERICAN | 73 |  |  |
| TCGA-70- 6722-01A-11R-  1820-07 | Tumor | LUSC | RX | Stage IIIA | M0 | N1 | T3 | No | Alive | MALE | ASIAN | 47 | 367 |  |
| TCGA-70- 6723-01A-11R-  1820-07 | Tumor | LUSC | RX | Stage IIA | M0 | N0 | T3 | No | Alive | MALE | ASIAN | 65 | 375 |  |
| TCGA-77- 6842-01A-11R-  1949-07 | Tumor | LUSC | R0 | Stage IIB | M0 | N1 | T2 | Yes | Dead | MALE | WHITE | 79 | 899 |  |
| TCGA-77- 6843-01A-11R-  1949-07 | Tumor | LUSC | R0 | Stage IIA | M0 | N1 | T1 | Yes | Dead | MALE | WHITE | 74 | 2224 |  |
| TCGA-77- 6844-01A-11R-  1949-07 | Tumor | LUSC | R0 | Stage IIIA | M0 | N1 | T3 | Yes | Dead | MALE | WHITE | 74 | 2284 |  |
| TCGA-77- 6845-01A-11R-  1949-07 | Tumor | LUSC | R0 | Stage IIB | M0 | N0 | T3 | Yes | Dead | MALE | WHITE | 69 | 708 |  |
| TCGA-77- 7138-01A-41R-  2045-07 | Tumor | LUSC | R0 | Stage IB | M0 | N0 | T2 | Yes | Dead | MALE | Not Available | 67 | 340 |  |
| TCGA-77- 7138-11A-01R-  2045-07 | Normal | LUSC | R0 | Stage IB | M0 | N0 | T2 | Yes | Dead | MALE | Not Available | 67 | 340 |  |
| TCGA-77- 7139-01A-11R-  2045-07 | Tumor | LUSC | R0 | Stage IIB | M0 | N1 | T2 | Yes | Alive | MALE | WHITE | 56 | 4261 |  |
| TCGA-77- 7140-01A-41R-  2045-07 | Tumor | LUSC | R0 | Stage IIB | M0 | N1 | T2 | No | Dead | FEMALE | WHITE | 69 | 632 |  |
| TCGA-77- 7141-01A-11R-  2045-07 | Tumor | LUSC | R0 | Stage IB | M0 | N0 | T2 | Yes | Alive | MALE | WHITE | 64 | 15 |  |
| TCGA-77- 7142-01A-11R-  2045-07 | Tumor | LUSC | R0 | Stage IB | M0 | N0 | T2 | Yes | Alive | FEMALE | WHITE | 59 | 2227 |  |
| TCGA-77- 7142-11A-01R-  2045-07 | Normal | LUSC | R0 | Stage IB | M0 | N0 | T2 | Yes | Alive | FEMALE | WHITE | 59 | 2227 |  |
| TCGA-77- 7335-01A-11R-  2045-07 | Tumor | LUSC | R0 | Stage IIIB | M0 | N2 | T4 | Yes | Dead | FEMALE | WHITE | 62 | 2133 |  |
| TCGA-77- 7335-11A-01R-  2045-07 | Normal | LUSC | R0 | Stage IIIB | M0 | N2 | T4 | Yes | Dead | FEMALE | WHITE | 62 | 2133 |  |
| TCGA-77- 7337-01A-21R-  2045-07 | Tumor | LUSC | R0 | Stage IIB | M0 | N1 | T2 | Yes | Dead | MALE | WHITE | 65 | 3253 |  |
| TCGA-77- 7337-11A-01R-  2045-07 | Normal | LUSC | R0 | Stage IIB | M0 | N1 | T2 | Yes | Dead | MALE | WHITE | 65 | 3253 |  |
| TCGA-77- 7338-01A-11R-  2045-07 | Tumor | LUSC | R1 | Stage IB | M0 | N0 | T2 | Yes | Dead | MALE | WHITE | 64 | 5 |  |
| TCGA-77- 7338-11A-01R-  2045-07 | Normal | LUSC | R1 | Stage IB | M0 | N0 | T2 | Yes | Dead | MALE | WHITE | 64 | 5 |  |
| TCGA-77- 7463-01A-11R-  2045-07 | Tumor | LUSC | R0 | Stage IB | M0 | N0 | T2 | Yes | Dead | MALE | WHITE | 75 | 1423 |  |
| TCGA-77- 7465-01A-11R-  2045-07 | Tumor | LUSC | R0 | Stage IIA | M0 | N1 | T2a | Yes | Alive | MALE | WHITE | 58 | 990 |  |
| TCGA-77- 8007-01A-11R-  2187-07 | Tumor | LUSC | R0 | Stage IIB | M0 | N1 | T2 | Yes | Dead | MALE | Not Available | 68 | 198 |  |
| TCGA-77- 8007-11A-01R-  2187-07 | Normal | LUSC | R0 | Stage IIB | M0 | N1 | T2 | Yes | Dead | MALE | Not Available | 68 | 198 |  |
| TCGA-77- 8008-01A-21R-  2187-07 | Tumor | LUSC | R0 | Stage IB | M0 | N0 | T2 | Yes | Dead | MALE | Not Available | 68 | 2639 |  |
| TCGA-77- 8008-11A-01R-  2187-07 | Normal | LUSC | R0 | Stage IB | M0 | N0 | T2 | Yes | Dead | MALE | Not Available | 68 | 2639 |  |
| TCGA-77- 8009-01A-11R-  2187-07 | Tumor | LUSC | R0 | Stage IIB | M0 | N1 | T2 | Yes | Alive | MALE | Not Available | 68 | 1695 |  |
| TCGA-77- 8128-01A-11R-  2247-07 | Tumor | LUSC | R0 | Stage IIIA | M0 | N2 | T2 | Yes | Dead | MALE | Not Evaluated | 60 | 1150 |  |
| TCGA-77- 8130-01A-11R-  2247-07 | Tumor | LUSC | R0 | Stage IIB | M0 | N1 | T2 | Yes | Alive | MALE | Not Evaluated | 69 | 4765 |  |
| TCGA-77- 8131-01A-11R-  2247-07 | Tumor | LUSC | R0 | Stage IB | M0 | NX | T2 | Yes | Dead | MALE | Not Evaluated | 72 | 383 |  |
| TCGA-77- 8133-01A-12R-  2247-07 | Tumor | LUSC | R0 | Stage IIA | M0 | N1 | T1 | Yes | Dead | MALE | Not Evaluated | 74 | 1640 |  |
| TCGA-77- 8136-01A-11R-  2247-07 | Tumor | LUSC | R0 | Stage IIB | M0 | N1 | T2 | Yes | Dead | FEMALE | Not Evaluated | 74 | 1189 |  |
| TCGA-77- 8138-01A-11R-  2247-07 | Tumor | LUSC | R0 | Stage IB | M0 | N0 | T2 | Yes | Dead | MALE | Not Evaluated | 74 | 539 |  |
| TCGA-77- 8139-01A-11R-  2247-07 | Tumor | LUSC | R0 | Stage IIB | M0 | N0 | T3 | Yes | Alive | MALE | Not Evaluated | 72 | 3166 |  |
| TCGA-77- 8140-01A-11R-  2247-07 | Tumor | LUSC | R0 | Stage IIB | M0 | N1 | T2 | Yes | Dead | FEMALE | Not Evaluated | 66 | 351 |  |
| TCGA-77- 8143-01A-11R-  2247-07 | Tumor | LUSC | R0 | Stage IIIA | M0 | N2 | T2 | Yes | Dead | MALE | Not Evaluated | 76 | 803 |  |
| TCGA-77- 8144-01A-11R-  2247-07 | Tumor | LUSC | R0 | Stage IB | M0 | N0 | T2 | Yes | Alive | MALE | Not Evaluated | 70 | 833 |  |
| TCGA-77- 8145-01A-11R-  2247-07 | Tumor | LUSC | R1 | Stage IIIB | M0 | N1 | T4 | Yes | Dead | MALE | Not Evaluated | 73 | 212 |  |
| TCGA-77- 8146-01A-11R-  2247-07 | Tumor | LUSC | R0 | Stage IA | M0 | N0 | T1 | Yes | Alive | MALE | Not Evaluated | 72 | 3189 |  |
| TCGA-77- 8148-01A-11R-  2247-07 | Tumor | LUSC | R0 | Stage IIIA | M0 | N1 | T3 | Yes | Alive | MALE | Not Evaluated | 68 | 2023 |  |
| TCGA-77- 8150-01A-11R-  2247-07 | Tumor | LUSC | R0 | Stage IIIA | M0 | N1 | T3 | Yes | Dead | MALE | Not Evaluated | 64 | 1655 |  |
| TCGA-77- 8153-01A-11R-  2403-07 | Tumor | LUSC | R0 | Stage IB | M0 | N0 | T2 | Yes | Alive | FEMALE | Not Evaluated | 77 | 1992 |  |
| TCGA-77- 8154-01A-11R-  2247-07 | Tumor | LUSC | R0 | Stage IA | M0 | N0 | T1 | Yes | Alive | MALE | Not Evaluated | 67 | 1841 |  |
| TCGA-77- 8156-01A-11R-  2247-07 | Tumor | LUSC | R0 | Stage IB | M0 | N0 | T2a | Yes | Alive | MALE | Not Evaluated | 60 | 1106 |  |
| TCGA-77- A5FZ-01A- 31R-A27Q-07 | Tumor | LUSC | R0 | Stage IIIB | M0 | N0 | T4 | Yes | Dead | MALE | Not Evaluated | 64 | 3838 |  |
| TCGA-77- A5G1-01A- 11R-A27Q-07 | Tumor | LUSC | R0 | Stage IIIA | M0 | N1 | T3 | Yes | Alive | MALE | Not Evaluated | 75 | 4026 |  |
| TCGA-77- A5G3-01A- 31R-A27Q-07 | Tumor | LUSC | R0 | Stage IIB | M0 | N1 | T2 | Yes | Alive | MALE | Not Evaluated | 63 | 4570 |  |
| TCGA-77-  A5G6-01A- 11R-A27Q-07 | Tumor | LUSC | R0 | Stage IIIA | M0 | N2 | T2 | Yes | Dead | MALE | Not Evaluated | 66 | 678 |  |
| TCGA-77- A5G7-01B- 11R-A27Q-07 | Tumor | LUSC | R0 | Stage IA | M0 | N0 | T1 | Yes | Dead | MALE | Not Evaluated | 63 | 180 |  |
| TCGA-77- A5G8-01B- 11R-A27Q-07 | Tumor | LUSC | R0 | Stage IIB | M0 | N0 | T3 | Yes | Alive | MALE | Not Evaluated | 70 | 1884 |  |
| TCGA-77- A5GA-01A- 11R-A27Q-07 | Tumor | LUSC | R0 | Stage IB | M0 | N0 | T2a | Yes | Alive | MALE | Not Evaluated | 76 | 1280 |  |
| TCGA-77- A5GB-01B- 11R-A27Q-07 | Tumor | LUSC | R0 | Stage IB | M0 | NX | T2a | Yes | Dead | MALE | Not Evaluated | 90 | 937 |  |
| TCGA-77- A5GF-01A- 21R-A27Q-07 | Tumor | LUSC | R0 | Stage IIA | M0 | N1 | T2a | Yes | Alive | MALE | Not Evaluated | 70 | 840 |  |
| TCGA-77- A5GH-01A- 11R-A27Q-07 | Tumor | LUSC | R0 | Stage IB | M0 | N0 | T2a | Yes | Alive | MALE | Not Evaluated | 81 | 1182 |  |
| TCGA-79- 5596-01A-31R-  1949-07 | Tumor | LUSC | R0 | Stage IIIA | M0 | N1 | T3 | Yes | Alive | MALE | Not Available | Not Available |  |  |
| TCGA-85- 6175-01A-11R-  1820-07 | Tumor | LUSC | R0 | Stage IIB | M0 | N0 | T3 | No | Alive | FEMALE | WHITE | 63 | 294 |  |
| TCGA-85- 6560-01A-11R-  1820-07 | Tumor | LUSC | R0 | Stage IIA | M0 | N1 | T1b | Yes | Alive | MALE | WHITE | 59 | 1259 |  |
| TCGA-85- 6561-01A-11R-  1820-07 | Tumor | LUSC | R0 | Stage IB | M0 | NX | T2a | Yes | Alive | MALE | WHITE | 66 | 1224 |  |
| TCGA-85- 6798-01A-11R-  1949-07 | Tumor | LUSC | R0 | Stage IIIA | M0 | N1 | T3 | Yes | Alive | MALE | WHITE | 57 | 195 |  |
| TCGA-85- 7696-01A-11R-  2125-07 | Tumor | LUSC | R0 | Stage IA | M0 | N0 | T1 | Yes | Alive | MALE | WHITE | 64 | 1111 |  |
| TCGA-85- 7697-01A-11R-  2125-07 | Tumor | LUSC | R0 | Stage IIB | M0 | N0 | T3 | Yes | Alive | MALE | WHITE | 49 | 1063 |  |
| TCGA-85- 7698-01A-11R-  2125-07 | Tumor | LUSC | R0 | Stage IA | M0 | N0 | T1b | Yes | Alive | MALE | WHITE | 48 | 952 |  |
| TCGA-85- 7699-01A-11R-  2125-07 | Tumor | LUSC | R0 | Stage IIIA | M0 | N0 | T4 | Yes | Alive | MALE | WHITE | 73 | 1001 |  |
| TCGA-85- 7710-01A-11R-  2125-07 | Tumor | LUSC | Not Available | Stage IA | M0 | N0 | T1b | Yes | Alive | FEMALE | WHITE | 59 | 42 |  |
| TCGA-85- 7710-11A-01R-  2125-07 | Normal | LUSC | Not Available | Stage IA | M0 | N0 | T1b | Yes | Alive | FEMALE | WHITE | 59 | 42 |  |
| TCGA-85- 7843-01A-11R-  2125-07 | Tumor | LUSC | R0 | Stage IIA | M0 | N1 | T2a | Yes | Alive | MALE | WHITE | 50 | 35 |  |
| TCGA-85- 7844-01A-11R-  2125-07 | Tumor | LUSC | R0 | Stage IB | M0 | N0 | T2a | Yes | Alive | MALE | WHITE | 71 | 911 |  |
| TCGA-85- 7950-01A-11R-  2187-07 | Tumor | LUSC | RX | Stage IB | M0 | N0 | T2a | Yes | Alive | MALE | WHITE | 46 | 576 |  |
| TCGA-85- 8048-01A-11R-  2247-07 | Tumor | LUSC | R0 | Stage IA | M0 | N0 | T1 | Yes | Alive | MALE | WHITE | 62 | 765 |  |
| TCGA-85- 8049-01A-11R-  2247-07 | Tumor | LUSC | R0 | Stage IB | M0 | N0 | T2a | No | Alive | MALE | WHITE | 57 | 579 |  |
| TCGA-85- 8052-01A-11R-  2247-07 | Tumor | LUSC | R0 | Stage IIB | M0 | N0 | T3 | Yes | Alive | MALE | WHITE | 53 | 734 |  |
| TCGA-85- 8070-01A-11R-  2247-07 | Tumor | LUSC | R0 | Stage IB | M0 | N0 | T2 | Yes | Alive | MALE | WHITE | 71 | 960 |  |
| TCGA-85- 8071-01A-11R-  2247-07 | Tumor | LUSC | R0 | Stage IIA | M0 | N1 | T1a | Yes | Alive | MALE | WHITE | 52 | 815 |  |
| TCGA-85- 8072-01A-31R-  2247-07 | Tumor | LUSC | R0 | Stage IA | M0 | N0 | T1a | Yes | Alive | MALE | WHITE | 60 | 932 |  |
| TCGA-85- 8276-01A-11R-  2296-07 | Tumor | LUSC | R0 | Stage IIA | M0 | N1 | T1b | Yes | Alive | MALE | WHITE | 62 | 1050 |  |
| TCGA-85- 8277-01A-11R-  2296-07 | Tumor | LUSC | R0 | Stage IIIA | M0 | N1 | T3 | No | Alive | MALE | WHITE | 70 | 307 |  |
| TCGA-85- 8287-01A-11R-  2296-07 | Tumor | LUSC | R0 | Stage IA | M0 | N0 | T1b | Yes | Alive | MALE | WHITE | 72 | 23 |  |
| TCGA-85- 8288-01A-11R-  2296-07 | Tumor | LUSC | R0 | Stage IIA | M0 | N1 | T1b | Yes | Alive | MALE | WHITE | 70 | 402 |  |
| TCGA-85- 8350-01A-11R-  2296-07 | Tumor | LUSC | R0 | Stage IA | M0 | N0 | T1b | Yes | Alive | MALE | WHITE | 61 | 683 |  |
| TCGA-85- 8351-01A-11R-  2296-07 | Tumor | LUSC | R0 | Stage IIA | M0 | N1 | T2a | Yes | Alive | MALE | WHITE | 72 | 510 |  |
| TCGA-85- 8352-01A-31R-  2326-07 | Tumor | LUSC | R0 | Stage IIIA | M0 | N1 | T3 | Yes | Alive | MALE | WHITE | 67 | 161 |  |
| TCGA-85- 8353-01A-21R-  2296-07 | Tumor | LUSC | R0 | Stage IIIA | M0 | N1 | T3 | Yes | Alive | MALE | WHITE | 72 | 94 |  |
| TCGA-85- 8354-01A-31R-  2326-07 | Tumor | LUSC | R0 | Stage IB | M0 | N0 | T2a | Yes | Alive | MALE | WHITE | 53 | 995 |  |
| TCGA-85- 8355-01A-11R-  2296-07 | Tumor | LUSC | R0 | Stage IA | M0 | N0 | T1a | No | Alive | MALE | WHITE | 63 | 61 |  |
| TCGA-85- 8479-01A-11R-  2326-07 | Tumor | LUSC | R0 | Stage IA | M0 | N0 | T1a | Yes | Alive | MALE | WHITE | 66 | 468 |  |
| TCGA-85- 8481-01A-11R-  2326-07 | Tumor | LUSC | R0 | Stage IIB | M0 | N0 | T3 | Yes | Alive | MALE | WHITE | 70 | 236 |  |
| TCGA-85- 8580-01A-31R-  2403-07 | Tumor | LUSC | R0 | Stage IB | M0 | N0 | T2a | Yes | Alive | FEMALE | WHITE | 52 | 1113 |  |
| TCGA-85- 8582-01A-21R-  2403-07 | Tumor | LUSC | R0 | Stage IA | M0 | N0 | T1a | Yes | Alive | MALE | WHITE | 49 | 1160 |  |
| TCGA-85- 8584-01A-11R-  2403-07 | Tumor | LUSC | R0 | Stage IIA | M0 | N1 | T2a | Yes | Alive | MALE | WHITE | 71 | 383 |  |
| TCGA-85- 8664-01A-11R-  2403-07 | Tumor | LUSC | R0 | Stage IIB | M0 | N1 | T2b | Yes | Alive | MALE | WHITE | 73 | 550 |  |
| TCGA-85- 8666-01A-11R-  2403-07 | Tumor | LUSC | R0 | Stage IB | M0 | N0 | T2a | Yes | Alive | MALE | WHITE | 65 | 687 |  |
| TCGA-85- A4CL-01A- 41R-A26W-07 | Tumor | LUSC | R0 | Stage IA | M0 | N0 | T1b | Yes | Alive | MALE | WHITE | 65 | 921 |  |
| TCGA-85- A4CN-01A- 11R-A24H-07 | Tumor | LUSC | R0 | Stage IIB | M0 | N1 | T2b | Yes | Alive | FEMALE | WHITE | 56 | 1038 |  |
| TCGA-85- A4JB-01A-51R- A262-07 | Tumor | LUSC | R0 | Stage IIB | M0 | N0 | T3 | Yes | Alive | MALE | WHITE | 74 | 942 |  |
| TCGA-85- A4JC-01A-11R- A24Z-07 | Tumor | LUSC | R0 | Stage IIA | M0 | N0 | T2b | Yes | Alive | MALE | WHITE | 84 | 604 |  |
| TCGA-85- A4PA-01A-11R- A24Z-07 | Tumor | LUSC | R0 | Stage IB | M0 | N0 | T2a | Yes | Alive | MALE | WHITE | 61 | 741 |  |
| TCGA-85-  A4QQ-01A- 41R-A262-07 | Tumor | LUSC | R0 | Stage IB | M0 | N0 | T2a | Yes | Alive | MALE | WHITE | 68 | 927 |  |
| TCGA-85- A4QR-01A- 11R-A24Z-07 | Tumor | LUSC | R0 | Stage IB | M0 | N0 | T2a | Yes | Alive | MALE | WHITE | 67 | 600 |  |
| TCGA-85- A50M-01A- 21R-A262-07 | Tumor | LUSC | R0 | Stage IIA | M0 | N0 | T2b | Yes | Alive | MALE | ASIAN | 47 | 826 |  |
| TCGA-85- A50Z-01A-21R- A262-07 | Tumor | LUSC | R0 | Stage IIA | M0 | N0 | T2b | Yes | Alive | MALE | WHITE | 57 | 493 |  |
| TCGA-85- A510-01A-11R- A26W-07 | Tumor | LUSC | R0 | Stage IIB | M0 | N1 | T2b | Yes | Alive | FEMALE | WHITE | 74 | 482 |  |
| TCGA-85- A511-01A-21R- A262-07 | Tumor | LUSC | R0 | Stage IIB | M0 | N1 | T2b | Yes | Alive | MALE | WHITE | 62 | 455 |  |
| TCGA-85- A512-01A-11R- A26W-07 | Tumor | LUSC | R0 | Stage IIA | M0 | N1 | T1b | Yes | Alive | MALE | WHITE | 46 | 465 |  |
| TCGA-85-  A513-01A-12R- A26W-07 | Tumor | LUSC | R0 | Stage IA | M0 | NX | T1a | No | Alive | FEMALE | ASIAN | 60 | 910 |  |
| TCGA-85- A53L-01A-21R- A26W-07 | Tumor | LUSC | R0 | Stage IIA | M0 | N0 | T2b | Yes | Alive | MALE | ASIAN | 63 | 377 |  |
| TCGA-85- A5B5-01A- 21R-A26W-07 | Tumor | LUSC | R0 | Stage IA | M0 | N0 | T1b | Yes | Alive | MALE | WHITE | 58 | 111 |  |
| TCGA-90- 6837-01A-11R-  1949-07 | Tumor | LUSC | R0 | Stage IIB | MX | N0 | T3 | Yes | Alive | MALE | WHITE | 64 | 758 |  |
| TCGA-90- 6837-11A-01R-  1949-07 | Normal | LUSC | R0 | Stage IIB | MX | N0 | T3 | Yes | Alive | MALE | WHITE | 64 | 758 |  |
| TCGA-90- 7766-01A-21R-  2125-07 | Tumor | LUSC | R0 | Stage IA | MX | N0 | T1b | Yes | Alive | FEMALE | WHITE | 66 | 289 |  |
| TCGA-90- 7767-01A-11R-  2125-07 | Tumor | LUSC | R0 | Stage IIB | MX | N1 | T2b | Yes | Alive | MALE | WHITE | 56 | 89 |  |
| TCGA-90- 7767-11A-01R-  2125-07 | Normal | LUSC | R0 | Stage IIB | MX | N1 | T2b | Yes | Alive | MALE | WHITE | 56 | 89 |  |
| TCGA-90- 7769-01A-11R-  2125-07 | Tumor | LUSC | R0 | Stage IIB | MX | N1 | T2b | Yes | Alive | MALE | WHITE | 55 | 358 |  |
| TCGA-90- 7964-01A-21R-  2187-07 | Tumor | LUSC | R0 | Stage IB | MX | N0 | T2a | Yes | Alive | MALE | WHITE | 70 | 428 |  |
| TCGA-90- A4ED-01A- 31R-A24Z-07 | Tumor | LUSC | Not Evaluated | Stage IB | MX | N0 | T2a | Yes | Alive | MALE | WHITE | 69 | 615 |  |
| TCGA-90- A4EE-01A- 11R-A24Z-07 | Tumor | LUSC | Not Evaluated | Stage IIA | MX | N1 | T2a | Yes | Alive | MALE | WHITE | 53 | 688 |  |
| TCGA-90- A59Q-01A- 11R-A26W-07 | Tumor | LUSC | R0 | Stage IIA | MX | N1 | T2a | Yes | Alive | FEMALE | WHITE | 61 | 322 |  |
| TCGA-92- 7340-01A-21R-  2045-07 | Tumor | LUSC | R1 | Stage IIA | MX | N1 | T2a | Yes | Alive | FEMALE | WHITE | 45 | 82 |  |
| TCGA-92- 7340-11A-01R-  2045-07 | Normal | LUSC | R1 | Stage IIA | MX | N1 | T2a | Yes | Alive | FEMALE | WHITE | 45 | 82 |  |
| TCGA-92- 7341-01A-31R-  2045-07 | Tumor | LUSC | R0 | Stage IB | MX | N0 | T2a | Yes | Alive | MALE | WHITE | 71 | 106 |  |
| TCGA-92- 8063-01A-11R-  2247-07 | Tumor | LUSC | RX | Stage IIIA | MX | N2 | T2b | Yes | Alive | MALE | WHITE | 52 | 122 |  |
| TCGA-92- 8064-01A-11R-  2247-07 | Tumor | LUSC | RX | Discrepancy | MX | N0 | T2b | Yes | Alive | MALE | WHITE | 58 | 160 |  |
| TCGA-92- 8065-01A-11R-  2247-07 | Tumor | LUSC | RX | Stage IIB | MX | N0 | T3 | Yes | Alive | FEMALE | WHITE | 74 | 70 |  |
| TCGA-94- 7033-01A-11R-  1949-07 | Tumor | LUSC | R0 | Stage IB | MX | N0 | T2 | Yes | Alive | MALE | WHITE | 73 | 640 |  |
| TCGA-94- 7557-01A-11R-  2125-07 | Tumor | LUSC | Not Available | Stage IB | M0 | N0 | T2 | Yes | Dead | MALE | BLACK OR AFRICAN AMERICAN | 73 | 5 |  |
| TCGA-94- 7943-01A-11R-  2187-07 | Tumor | LUSC | R0 | Stage IA | MX | NX | T1b | Yes | Alive | MALE | WHITE | 80 | 559 |  |
| TCGA-94- 8035-01A-11R-  2247-07 | Tumor | LUSC | R0 | Stage IIB | MX | N0 | T3 | Yes | Alive | MALE | WHITE | 64 | 122 |  |
| TCGA-94- 8490-01A-11R-  2326-07 | Tumor | LUSC | R0 | Stage IIB | M0 | N0 | T3 | Yes | Alive | MALE | WHITE | 70 | 153 |  |
| TCGA-94- 8491-01A-11R-  2326-07 | Tumor | LUSC | Not Available | Stage IIA | M0 | N1 | T2a | Yes | Alive | MALE | WHITE | 73 | 810 |  |
| TCGA-94- A4VJ-01A-11R- A24Z-07 | Tumor | LUSC | Not Available | Stage IA | M0 | N0 | T1b | Yes | Alive | FEMALE | WHITE | 71 | 430 |  |
| TCGA-94-A5I4- 01A-11R- A26W-07 | Tumor | LUSC | RX | Stage IIA | MX | N1 | T2a | Yes | Alive | MALE | WHITE | 61 | 491 |  |
| TCGA-94-A5I6-  01A-21R- A27Q-07 | Tumor | LUSC | RX | Stage IIB | M0 | N0 | T3 | Yes | Alive | MALE | WHITE | 62 | 538 |  |
| TCGA-96- 7544-01A-11R-  2045-07 | Tumor | LUSC | Not Available | Stage IIB | MX | N1 | T2 | Yes | Alive | MALE | WHITE | 83 | 2160 |  |
| TCGA-96- 7545-01A-21R-  2045-07 | Tumor | LUSC | Not Available | Stage IA | MX | N0 | T1 | Yes | Alive | MALE | WHITE | 73 | 1736 |  |
| TCGA-96- 8169-01A-11R-  2296-07 | Tumor | LUSC | Not Available | Stage IA | M0 | N0 | T1a | Yes | Alive | FEMALE | WHITE | 67 | 557 |  |
| TCGA-96- 8170-01A-11R-  2296-07 | Tumor | LUSC | Not Available | Stage IIA | M0 | N1 | T1a | Yes | Alive | FEMALE | WHITE | 75 | 531 |  |
| TCGA-96- A4JK-01A-11R- A24Z-07 | Tumor | LUSC | R0 | Stage IIA | M0 | N1 | T2a | Yes | Alive | MALE | WHITE | 65 | 589 |  |
| TCGA-96- A4JL-01A-11R- A24Z-07 | Tumor | LUSC | R0 | Stage IIA | M0 | N1 | T2a | No | Alive | FEMALE | ASIAN | 78 | 842 |  |
| TCGA-98- 7454-01A-11R-  2045-07 | Tumor | LUSC | R0 | Stage IB | M0 | N0 | T2a | Yes | Alive | MALE | WHITE | 73 | 652 |  |
| TCGA-98- 8020-01A-11R-  2247-07 | Tumor | LUSC | R0 | Stage IIIA | M0 | N2 | T2 | No | Dead | FEMALE | BLACK OR AFRICAN AMERICAN | 56 | 84 |  |
| TCGA-98- 8021-01A-11R-  2247-07 | Tumor | LUSC | R0 | Stage IA | M0 | N0 | T1a | Yes | Alive | FEMALE | WHITE | 75 | 937 |  |
| TCGA-98- 8022-01A-11R-  2247-07 | Tumor | LUSC | R0 | Stage IA | M0 | N0 | T1a | Yes | Alive | MALE | WHITE | 61 | 933 |  |
| TCGA-98- 8023-01A-11R-  2247-07 | Tumor | LUSC | R0 | Stage IIIA | M0 | N1 | T3 | Yes | Alive | MALE | WHITE | 70 | 649 |  |
| TCGA-98- A538-01A-11R- A262-07 | Tumor | LUSC | R0 | Stage IIB | M0 | N0 | T3 | Yes | Alive | MALE | WHITE | 67 | 826 |  |
| TCGA-98-  A539-01A-31R- A262-07 | Tumor | LUSC | R0 | Stage IIB | M0 | N0 | T3 | Yes | Alive | MALE | WHITE | 63 | 173 |  |
| TCGA-98- A53A-01A-11R- A262-07 | Tumor | LUSC | R0 | Stage IB | M0 | N0 | T2a | Yes | Alive | MALE | BLACK OR AFRICAN AMERICAN | 70 | 552 |  |
| TCGA-98- A53B-01A-11R- A262-07 | Tumor | LUSC | R0 | Stage IB | M0 | N0 | T2a | Yes | Dead | MALE | WHITE | 69 | 61 |  |
| TCGA-98- A53C-01A- 11R-A262-07 | Tumor | LUSC | R0 | Stage IA | M0 | N0 | T1a | Yes | Alive | FEMALE | WHITE | 77 | 822 |  |
| TCGA-98- A53D-01A- 32R-A262-07 | Tumor | LUSC | R0 | Stage IIB | M0 | N0 | T3 | Yes | Alive | MALE | WHITE | 68 | 645 |  |
| TCGA-98- A53H-01A- 12R-A262-07 | Tumor | LUSC | R0 | Stage IA | M0 | N0 | T1a | Yes | Alive | FEMALE | WHITE | 76 | 618 |  |
| TCGA-98-A53I- 01A-31R-A262-  07 | Tumor | LUSC | R0 | Stage IIA | M0 | N1 | T2a | Yes | Alive | MALE | WHITE | 64 | 565 |  |
| TCGA-98- A53J-01A-11R- A26W-07 | Tumor | LUSC | R0 | Stage IB | M0 | N0 | T2a | Yes | Alive | MALE | WHITE | 77 | 630 |  |
| TCGA-J1- A4AH-01A- 31R-A24H-07 | Tumor | LUSC | R0 | Stage IIA | MX | N0 | T2b | Yes | Alive | MALE | WHITE | 70 | 581 |  |
| TCGA-L3- A4E7-01A-11R- A24Z-07 | Tumor | LUSC | R0 | Stage IB | M0 | N0 | T2a | Yes | Alive | MALE | WHITE | 71 | 392 |  |
| TCGA-L3- A524-01A-11R- A262-07 | Tumor | LUSC | R0 | Stage IIB | M0 | N0 | T3 | Yes | Alive | FEMALE | WHITE | 45 | 490 |  |
| TCGA-LA- A446-01A-21R- A24Z-07 | Tumor | LUSC | R0 | Stage IA | MX | N0 | T1b | Yes | Alive | MALE | WHITE | 68 | 401 |  |
| TCGA-LA- A7SW-01A- 11R-A405-07 | Tumor | LUSC | R0 | Stage IIIA | MX | N1 | T3 | Yes | Alive | MALE | BLACK OR AFRICAN AMERICAN | 71 | 408 |  |
| TCGA-MF- A522-01A-11R- A262-07 | Tumor | LUSC | Not Available | Stage IB | MX | N0 | T2a | Yes | Alive | MALE | WHITE | 54 | 360 |  |
| TCGA-NC- A5HD-01A- 11R-A26W-07 | Tumor | LUSC | R0 | Stage IIB | M0 | N0 | T3 | Yes | Dead | MALE | WHITE | 79 | 2 |  |
| TCGA-NC- A5HE-01A- 11R-A26W-07 | Tumor | LUSC | R0 | Stage IIB | M0 | N1 | T2 | Yes | Alive | MALE | WHITE | 60 | 2336 |  |
| TCGA-NC- A5HF-01A- 11R-A26W-07 | Tumor | LUSC | R0 | Stage IIIB | MX | N0 | T4 | Yes | Dead | MALE | WHITE | 74 | 138 |  |
| TCGA-NC- A5HG-01A- 11R-A26W-07 | Tumor | LUSC | R0 | Stage IIIA | M0 | N2 | T2 | Yes | Alive | MALE | WHITE | 59 | 1963 |  |
| TCGA-NC- A5HH-01A- 11R-A26W-07 | Tumor | LUSC | R0 | Stage IA | M0 | N0 | T1 | Yes | Alive | MALE | WHITE | 53 | 37 |  |
| TCGA-NC- A5HI-01A-11R- A26W-07 | Tumor | LUSC | R0 | Stage IB | M0 | N0 | T2 | Yes | Alive | FEMALE | WHITE | 68 | 1743 |  |
| TCGA-NC- A5HJ-01A-11R- A26W-07 | Tumor | LUSC | R0 | Stage IIB | M0 | N0 | T3 | Yes | Dead | MALE | WHITE | 59 | 418 |  |
| TCGA-NC- A5HK-01A- 11R-A26W-07 | Tumor | LUSC | R0 | Stage IIB | M0 | N0 | T3 | Yes | Alive | FEMALE | WHITE | 58 | 128 |  |
| TCGA-NC- A5HL-01A- 11R-A26W-07 | Tumor | LUSC | R0 | Stage IIA | M0 | N0 | T2b | Yes | Dead | MALE | WHITE | 73 | 88 |  |
| TCGA-NC- A5HM-01A- 12R-A26W-07 | Tumor | LUSC | R0 | Stage IB | M0 | N0 | T2a | Yes | Alive | MALE | WHITE | 76 | 1212 |  |
| TCGA-NC- A5HN-01A- 11R-A26W-07 | Tumor | LUSC | R0 | Stage IIA | M0 | N1 | T2a | Yes | Alive | MALE | WHITE | 77 | 1499 |  |
| TCGA-NC- A5HO-01A- 11R-A26W-07 | Tumor | LUSC | Not Evaluated | Stage IIIA | M0 | N1 | T3 | Yes | Alive | FEMALE | WHITE | 70 | 1336 |  |
| TCGA-NC- A5HP-01A- 11R-A26W-07 | Tumor | LUSC | R0 | Stage IV | M1b | N0 | T2a | Yes | Alive | MALE | WHITE | 69 | 770 |  |
| TCGA-NC- A5HQ-01A- 11R-A26W-07 | Tumor | LUSC | R0 | Stage IIIA | M0 | N2 | T3 | Yes | Dead | MALE | WHITE | 70 | 448 |  |
| TCGA-NC- A5HR-01A- 21R-A26W-07 | Tumor | LUSC | R0 | Stage IIA | M0 | N1 | T2a | Yes | Alive | FEMALE | WHITE | 75 | 1244 |  |
| TCGA-NC- A5HT-01A- 11R-A26W-07 | Tumor | LUSC | R0 | Stage IIIA | M0 | N1 | T3 | Yes | Alive | MALE | WHITE | 69 | 804 |  |
| TCGA-NK- A5CR-01A-  11R-A26W-07 | Tumor | LUSC | Not Evaluated | Stage IB | MX | N0 | T2 | Yes | Alive | MALE | Unknown | 77 | 2542 |  |
| TCGA-NK- A5CT-01A- 31R-A26W-07 | Tumor | LUSC | Not Evaluated | Stage IA | M0 | N0 | T1 | Discrepa ncy | Alive | MALE | WHITE | 70 | 1997 |  |
| TCGA-NK- A5CX-01A- 11R-A26W-07 | Tumor | LUSC | Not Evaluated | Stage IIA | MX | N0 | T2b | Yes | Alive | MALE | WHITE | 73 | 111 |  |
| TCGA-NK- A5D1-01A- 11R-A26W-07 | Tumor | LUSC | Not Evaluated | Stage IIA | M0 | N1 | T2a | Discrepa ncy | Alive | MALE | WHITE | 57 | 511 |  |
| TCGA-NK- A7XE-01A- 12R-A405-07 | Tumor | LUSC | Not Available | Stage IIIB | M0 | N2 | T4 | Yes | Alive | MALE | BLACK OR AFRICAN AMERICAN | 66 | 13 |  |
| TCGA-O2- A52N-01A- 11R-A26W-07 | Tumor | LUSC | Not Available | Stage I | MX | N0 | T2 | Yes | Dead | MALE | WHITE | 78 | 1006 |  |
| TCGA-O2- A52Q-01A- 11R-A26W-07 | Tumor | LUSC | Not Evaluated | Stage III | MX | N1 | T3 | Yes | Dead | FEMALE | WHITE | 44 | 113 |  |
| TCGA-O2-  A52S-01A-11R- A262-07 | Tumor | LUSC | Not Evaluated | Stage III | MX | N2 | T4 | Yes | Dead | FEMALE | WHITE | 57 | 387 |  |
| TCGA-O2- A52V-01A-31R- A262-07 | Tumor | LUSC | Not Evaluated | Stage II | MX | N0 | T3 | Yes | Dead | FEMALE | BLACK OR AFRICAN AMERICAN | 75 | 1335 |  |
| TCGA-O2- A52W-01A- 11R-A26W-07 | Tumor | LUSC | Not Evaluated | Stage I | MX | N0 | T2 | Yes | Dead | MALE | BLACK OR AFRICAN AMERICAN | 63 | 261 |  |
| TCGA-O2- A5IB-01A-11R- A27Q-07 | Tumor | LUSC | Not Evaluated | Stage III | MX | N1 | T3 | Yes | Dead | FEMALE | WHITE | 71 | 340 |  |
| TCGA-XC- AA0X-01A- 32R-A405-07 | Tumor | LUSC | R0 | Stage IA | M0 | N0 | T1a | Yes | Dead | FEMALE | BLACK OR AFRICAN AMERICAN | 77 | 6 |  |

**Table S2.** Clinicopathological Characteristics in 100 Patients with LUAD and 60 Patients with LUSC.

| Characteristics |  | LUAD Patients (n=100) | LUSC Patients  (n=60) |
| --- | --- | --- | --- |
| Age (years) | <=65 | 37 | 21 |
| >65 | 63 | 39 |
| Gender | Male | 60 | 47 |
| Female | 40 | 13 |
| Smoker | Ever | 81 | 56 |
| Never | 19 | 4 |
| T stage | T1 | 23 | 12 |
| T2 | 57 | 23 |
| T3 | 13 | 17 |
| T4 | 7 | 8 |
| N stage | N0 | 55 | 23 |
| N1 | 30 | 24 |
| N2 | 10 | 8 |
| N3 | 5 | 5 |
| M stage | M0 | 92 | 57 |
| M1 | 8 | 3 |
| Pathologic stage | I | 45 | 25 |
| II | 27 | 21 |
| III | 18 | 10 |
| IV | 10 | 4 |
| Differentiation | Well | 25 | 17 |
| Moderate | 42 | 28 |
| Poor | 33 | 15 |
| DEPDC1B Expression |  |  |  |
| tumor tissue | No or low expression | 41 | 27 |
| high expression | 59 | 33 |
| normal tissue | No or low expression | 96 | 58 |
| high expression | 4 | 2 |

DEPDC1B, DEP domain-containing 1 B; LUAD, lung adenocarcinoma. LUSC, lung [squamous cell carcinoma](https://www.cancer.gov/Common/PopUps/popDefinition.aspx?id=CDR0000046595&version=Patient&language=English)
